# Supplementary material for: Exploring the Diversity of Plant-Associated Viruses and Related Viruses in Riverine Freshwater Samples Collected in Berlin, Germany
Source: MDPI journal article supplement (doi:10.3390/pathogens12121458), 2023-12-15
Supplement: s1 [file s1]

## **Supplementary material**

### **Exploring the diversity of plant-associated viruses and related viruses in riverine freshwater samples collected in Berlin, Germany**

**Roland Zell<sup>1</sup>, Marco Groth<sup>2</sup>, Lukas Selinka<sup>1</sup>, Hans-Christoph Selinka<sup>3</sup>**

## Legends to Supplementary Figures:

**Supplementary Figure S1: Phylogenetic analysis of tombus-like viruses.** The dataset includes 518 RdRp sequences and is comprised of 282 Teltow Canal tombus-like viruses (TC-Tombus-LV, printed in red), 75 Havel River tombus-like viruses (H-Tombus-LV, printed in red), 99 unclassified tombus-like viruses downloaded from GenBank (printed in blue), 57 reference viruses of the *Tolivirales* and 5 reference viruses of the *Nodamuvirales* (printed in black). Amino acid sequences were aligned with MEGA and used for tree inference with IQTREE 2 (optimal substitution model: VT+F+R10; 10,000 ultrafast replications). The tree was arbitrarily rooted with nodaviruses. The scale bar indicates substitutions per site. Presented are GenBank accession numbers, virus names, and – if available – genus names, (sub-)family names, order names. Yellow and ochre boxes identify viruses which use translation table 6 and express a viral methyltransferase, respectively. Numbers at nodes indicate ultrafast bootstrap support greater 75%.

**Supplementary Figure S2: Phylogenetic analysis of capsid proteins with similarity to peptidase A 21.** CP sequences of 11 reference viruses of the *Alphatetraviridae*, *Carmotetraviridae*, and *Permutotetraviridae* families (printed in black) were aligned with CP sequences of this study (printed in red) and unclassified viruses retrieved from GenBank (printed in blue). Amino acid sequences were aligned with MEGA and used for tree inference with IQTREE 2 (optimal substitution model: Q-pfam+F+G4; 1000 replications). Numbers at nodes indicate bootstrap support. The scale bar indicates substitutions per site. Presented are GenBank accession numbers, family names (in bold letters), genus names, virus names and strain designations if two or three viruses of a species were included in the alignment.

**Supplementary Figure S3: Phylogenetic analysis of 165 capsid protein sequences.** The alignment included 54 amino acid sequences of Teltow Canal tombus-like viruses (TC-Tombus-LV, printed in red), 27 sequences of Havel tombus-like viruses (H-Tombus-LV, printed in red), 68 reference viruses of the *Tombusviridae* and *Solemoviridae* (printed in black) and 16 sequences of unclassified viruses (printed in blue). IQTREE2 was used for tree inference (optimal substitution model: Q.pfam+F+R5; 1000 bootstrap replications). The tree was arbitrarily rooted with sequences of the pfam00894 cluster. The scale bar indicates substitutions per site. Presented are GenBank accession numbers, virus names, and – if available – genus names and family names. Numbers at nodes indicate bootstrap support greater 50%. Square brackets indicate the protein family (pfam) annotation. Yellow boxes highlight viruses which use translation table 6. Numbers at nodes indicate ultrafast bootstrap support greater 75%.

**Supplementary Figure S4: Phylogenetic analysis of solemo-like viruses.** The dataset includes 144 RdRp sequences and is comprised of 48 Teltow Canal solemo-like viruses (TC-solemo-LV, printed in red), 24 Havel River solemo-like viruses (H-Solemo-LV, printed in red), 28 unclassified viruses downloaded from GenBank (printed in blue), 35 reference viruses of the *Solemoviridae* (printed in black), 5 reference viruses of the *Tombusviridae* (printed in black), 2 reference viruses of the *Alvernaviridae* (printed in black), and 1 reference virus of the *Barnaviridae* (printed in black). Amino acid sequences were aligned with MEGA and used for tree inference with IQTREE 2 (optimal substitution model: VT+F+R9; 10,000 ultrafast replications). The tree was arbitrarily rooted with tombusviruses. The scale bar indicates substitutions per site. Presented are GenBank accession numbers, virus names, and – if available – genus names, family names, order names. Yellow boxes highlight viruses of solemo-like clade A. The strong yellow box marks viruses with presumed proteinase activity of their capsid protein, the light yellow box distinguishes viruses with similarity to

peptidase A6 but lacking proteinase activity. Brown boxes highlight viruses with barna-like RdRp (cd23184), i.e., barnavirus, Tk-Solemo-LV-63, and solemo-like clades B and C. Numbers at nodes indicate ultrafast bootstrap support greater 75%.

**Supplementary Figure S5: Phylogenetic analysis of solemo-like clade A capsid proteins.** CP sequences of 10 solemo-like clade A viruses (printed in red) were aligned with CP sequences of five alphanodaviruses (printed in black). The yellow box indicates three viruses with presumed peptidase A6 activity as judged from the presence of the active site aspartic acid (D<sub>86</sub> according to flock house virus numbering) and the cleavage site at asparagine 363 (according to flock house virus numbering). Tree inference was conducted with IQTREE2 (substitution model: Q.pfam+F+I+G4, 1000 replications). The tree was arbitrarily rooted with nodaviruses. Numbers at nodes indicate bootstrap support greater 50%. Abbreviations: H-Solemo-LV, Havel River solemo-like virus; TC-Solemo-LV, Teltow Canal solemo-like virus.

**Supplementary Figure S6: Phylogenetic analysis of partiti-like viruses. (A) RdRp analysis.** The dataset includes 90 RdRp sequences comprised of 12 partiti-like viruses of Teltow Canal, 38 reference viruses of the *Partitiviridae*, and 40 sequences of unclassified partiti-like viruses downloaded from GenBank. Amino acid sequences were aligned with MEGA and used for tree inference with IQTREE 2 (optimal substitution model: VT+F+R6; 1000 replications). The tree was arbitrarily rooted with betapartitiviruses. Square brackets indicate the members of the five partitivirus genera. **(B) - (D) Capsid protein analysis.** CP sequences of 18 betapartitivirus reference strains, 4 unclassified viruses and Havel partiti-like virus 1 **(B)**, 9 gammapartitiviruses, 4 unclassified viruses and Teltow Canal partiti-like virus 4 **(C)**, and 5 deltapartitiviruses, 5 unclassified viruses and Teltow Canal partiti-like virus 6 **(D)** were aligned with MEGA and used for tree inference with IQTREE2 (optimal substitution models: Q.pfam+F+R4 in **(B)**, LG+F+G4 **(C)**, Q.pfam+F+G4 **(D)**; 1000 replications). Presented are unrooted trees.

Numbers at nodes indicate bootstrap support greater 50%. The scale bar indicates substitutions per site. Color code: red, partiti-like viruses from Teltow Canal and Havel River; black, reference viruses; blue, unclassified viruses from GenBank.

**Supplementary Figure S7: Phylogenetic analysis of alphaflexi-like viruses.** RdRp **(A)** and helicase sequences **(B)** of Teltow Canal pepino mosaic viruses (printed in red) and 34 reference viruses (*Alphaflexiviridae*, *Betaflexiviridae*, *Deltaflexiviridae*, *Gammaflexiviridae*, and *Tymoviridae*; printed in black) were aligned with MEGA and used for tree inference with IQTREE2 (optimal substitution model: Q.pfam+F+I+G4 **(A)**, Q.pfam+I+G4 **(B)**; 1000 replications). The tree was arbitrarily rooted with the deltaflexiviruses. Presented are GenBank acc. nos., virus names and genus designations. Square brackets indicate families. Numbers at nodes indicate bootstrap support greater 50%. The scale bar indicates substitutions per site.

**Supplementary Figure S8: Genome layouts.** The genomes of *Procedovirinae/Tombusviridae* **(A)**, *Regressovirinae/Tombusviridae* **(B)**, and viruses of tombus-like clade A **(C)**, tombus-like viruses with methyltransferase **(D)**, and solemo-like clades A, B and C **(E)** of Teltow Canal and Havel River are presented with the aid of selected sequences. In **(A)**, **(B)** and **(E)**, the genome organization of reference viruses is included. Thick lines represent the genomes with boxes indicating open reading frames. The lengths of genomes is given. Short arrows and vertical lines indicate the position of readthrough termination codons of *Procedovirinae* members. -1FS and vertical lines indicate the position of -1-frameshift signals of *Regressovirinae* members. Abbreviations: CP, capsid protein; MP, movement protein; ORF, open reading frame; pept, peptidase; PLA2, phospholipase A2; RdRp, RNA-dependent RNA polymerase; Trp2, trypsin-like peptidase family 2; VMeTr, viral methyltransferase.

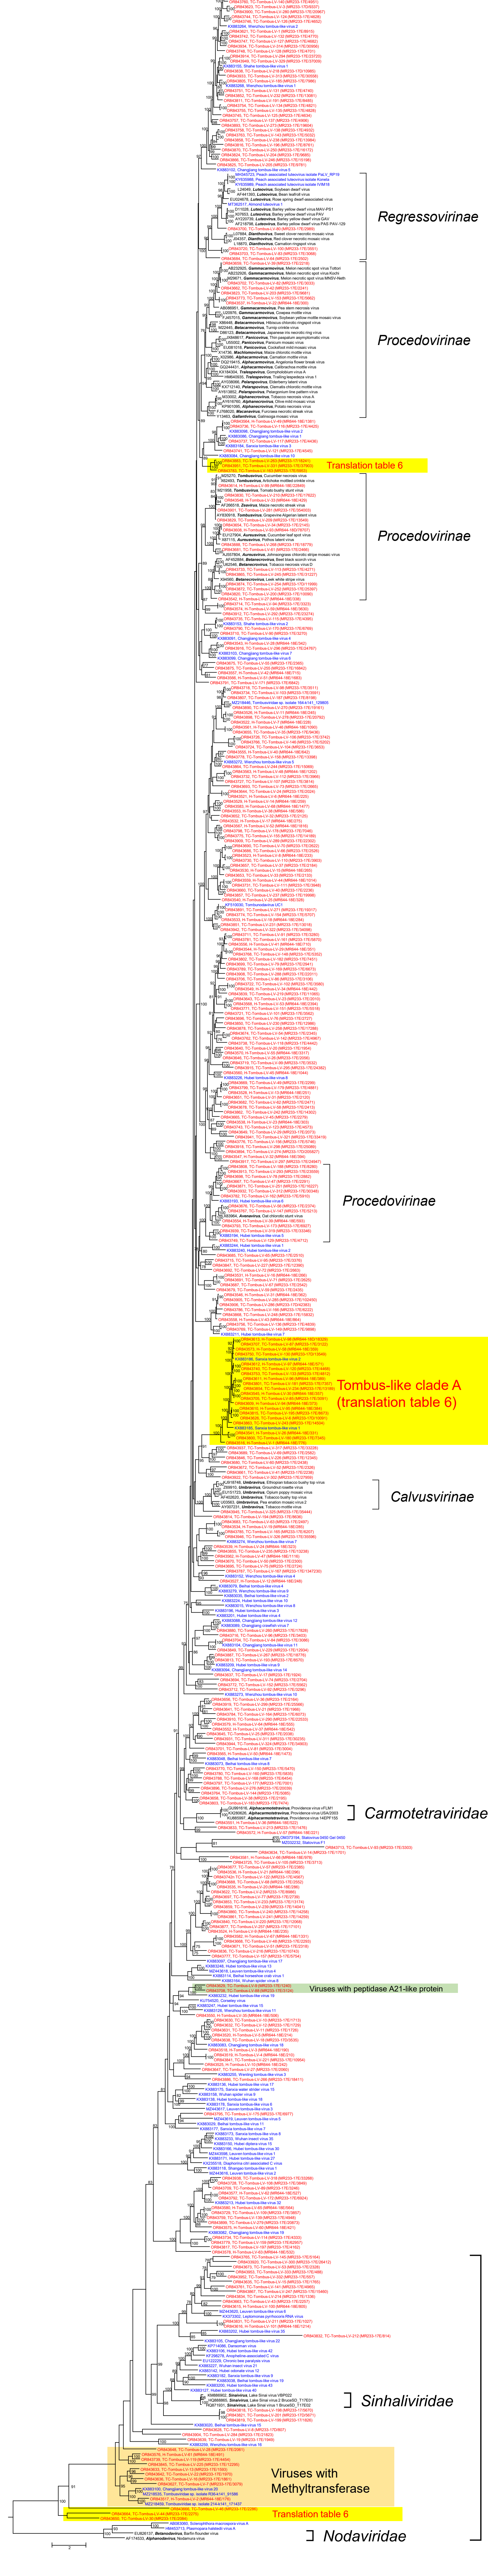



Figure S2

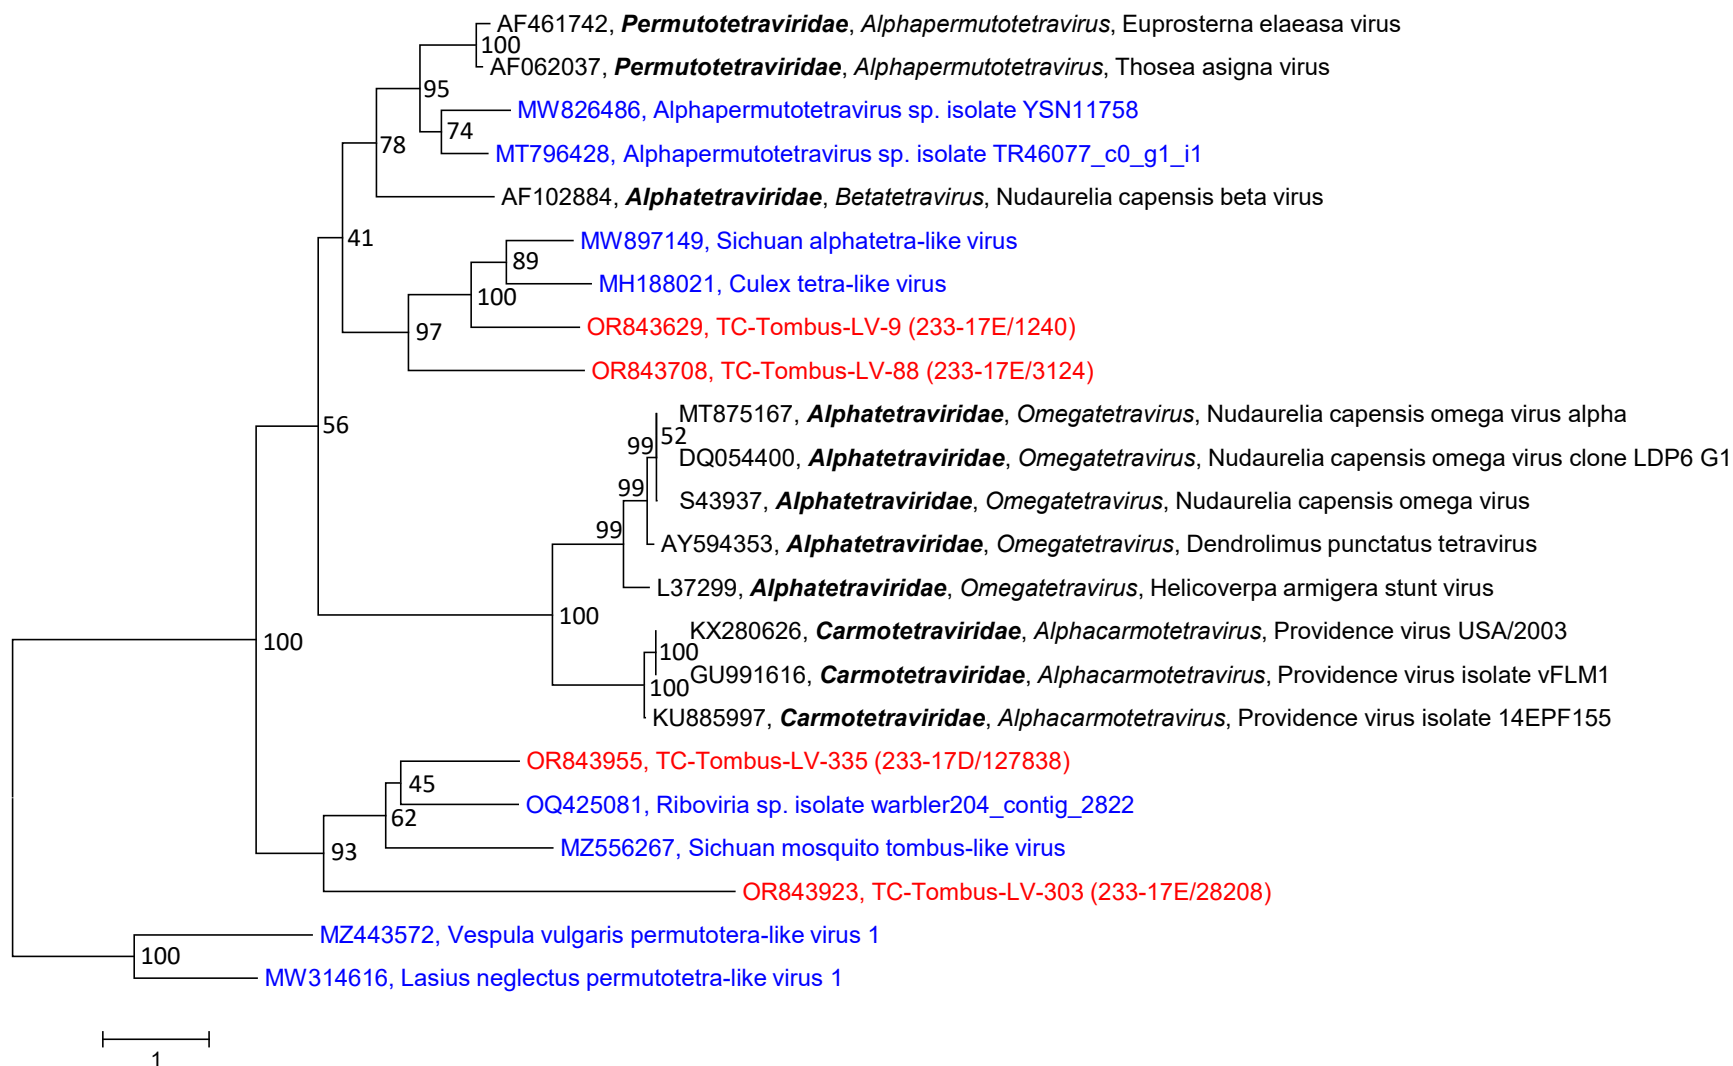

Figure S3

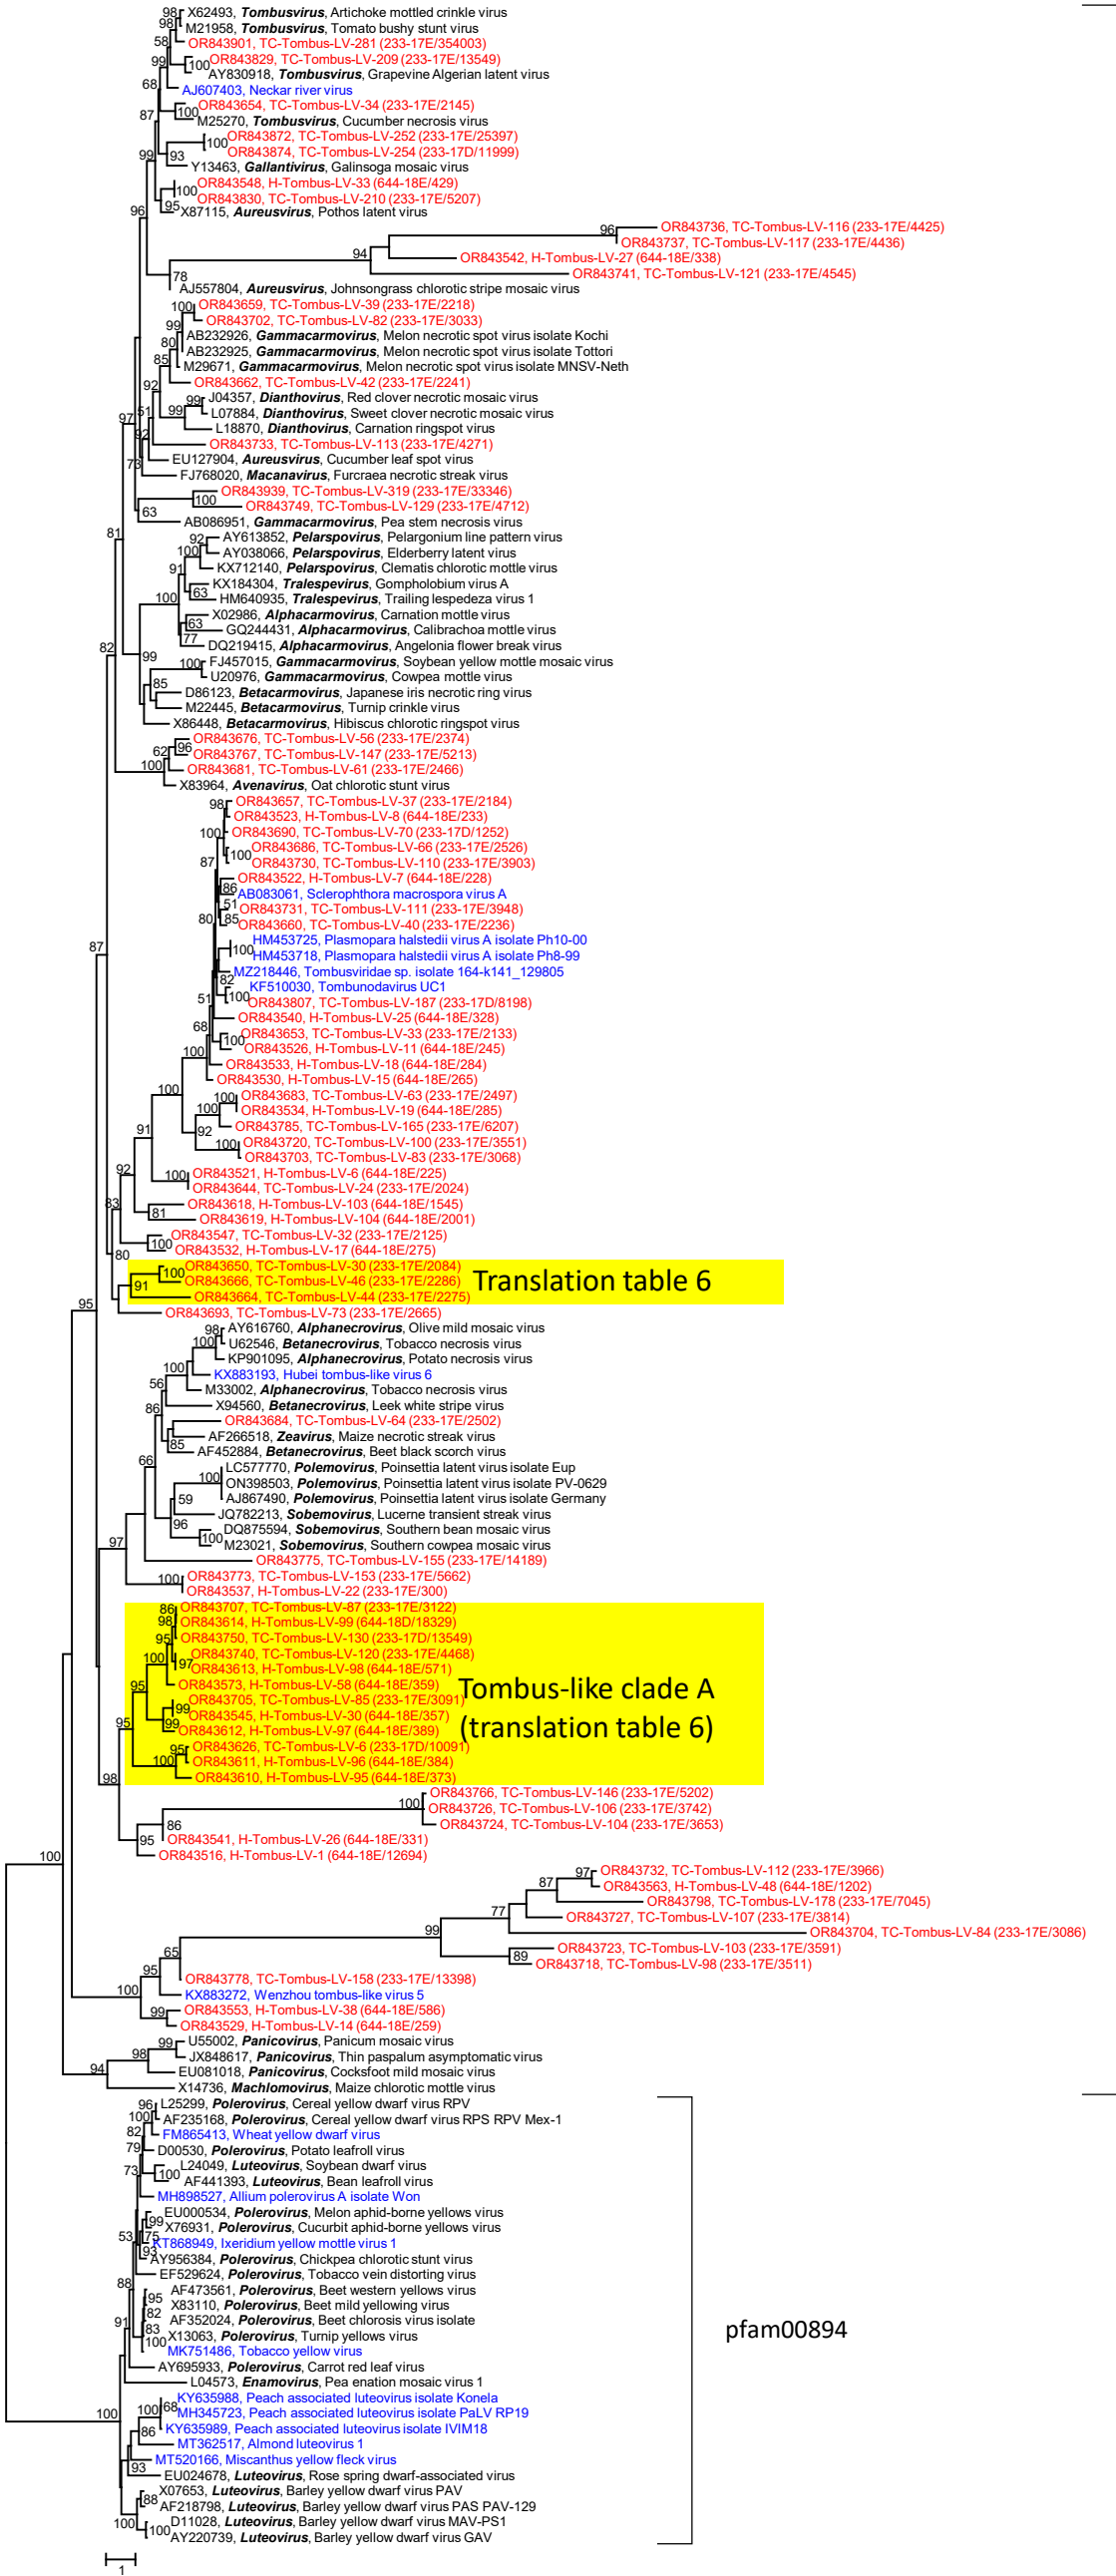

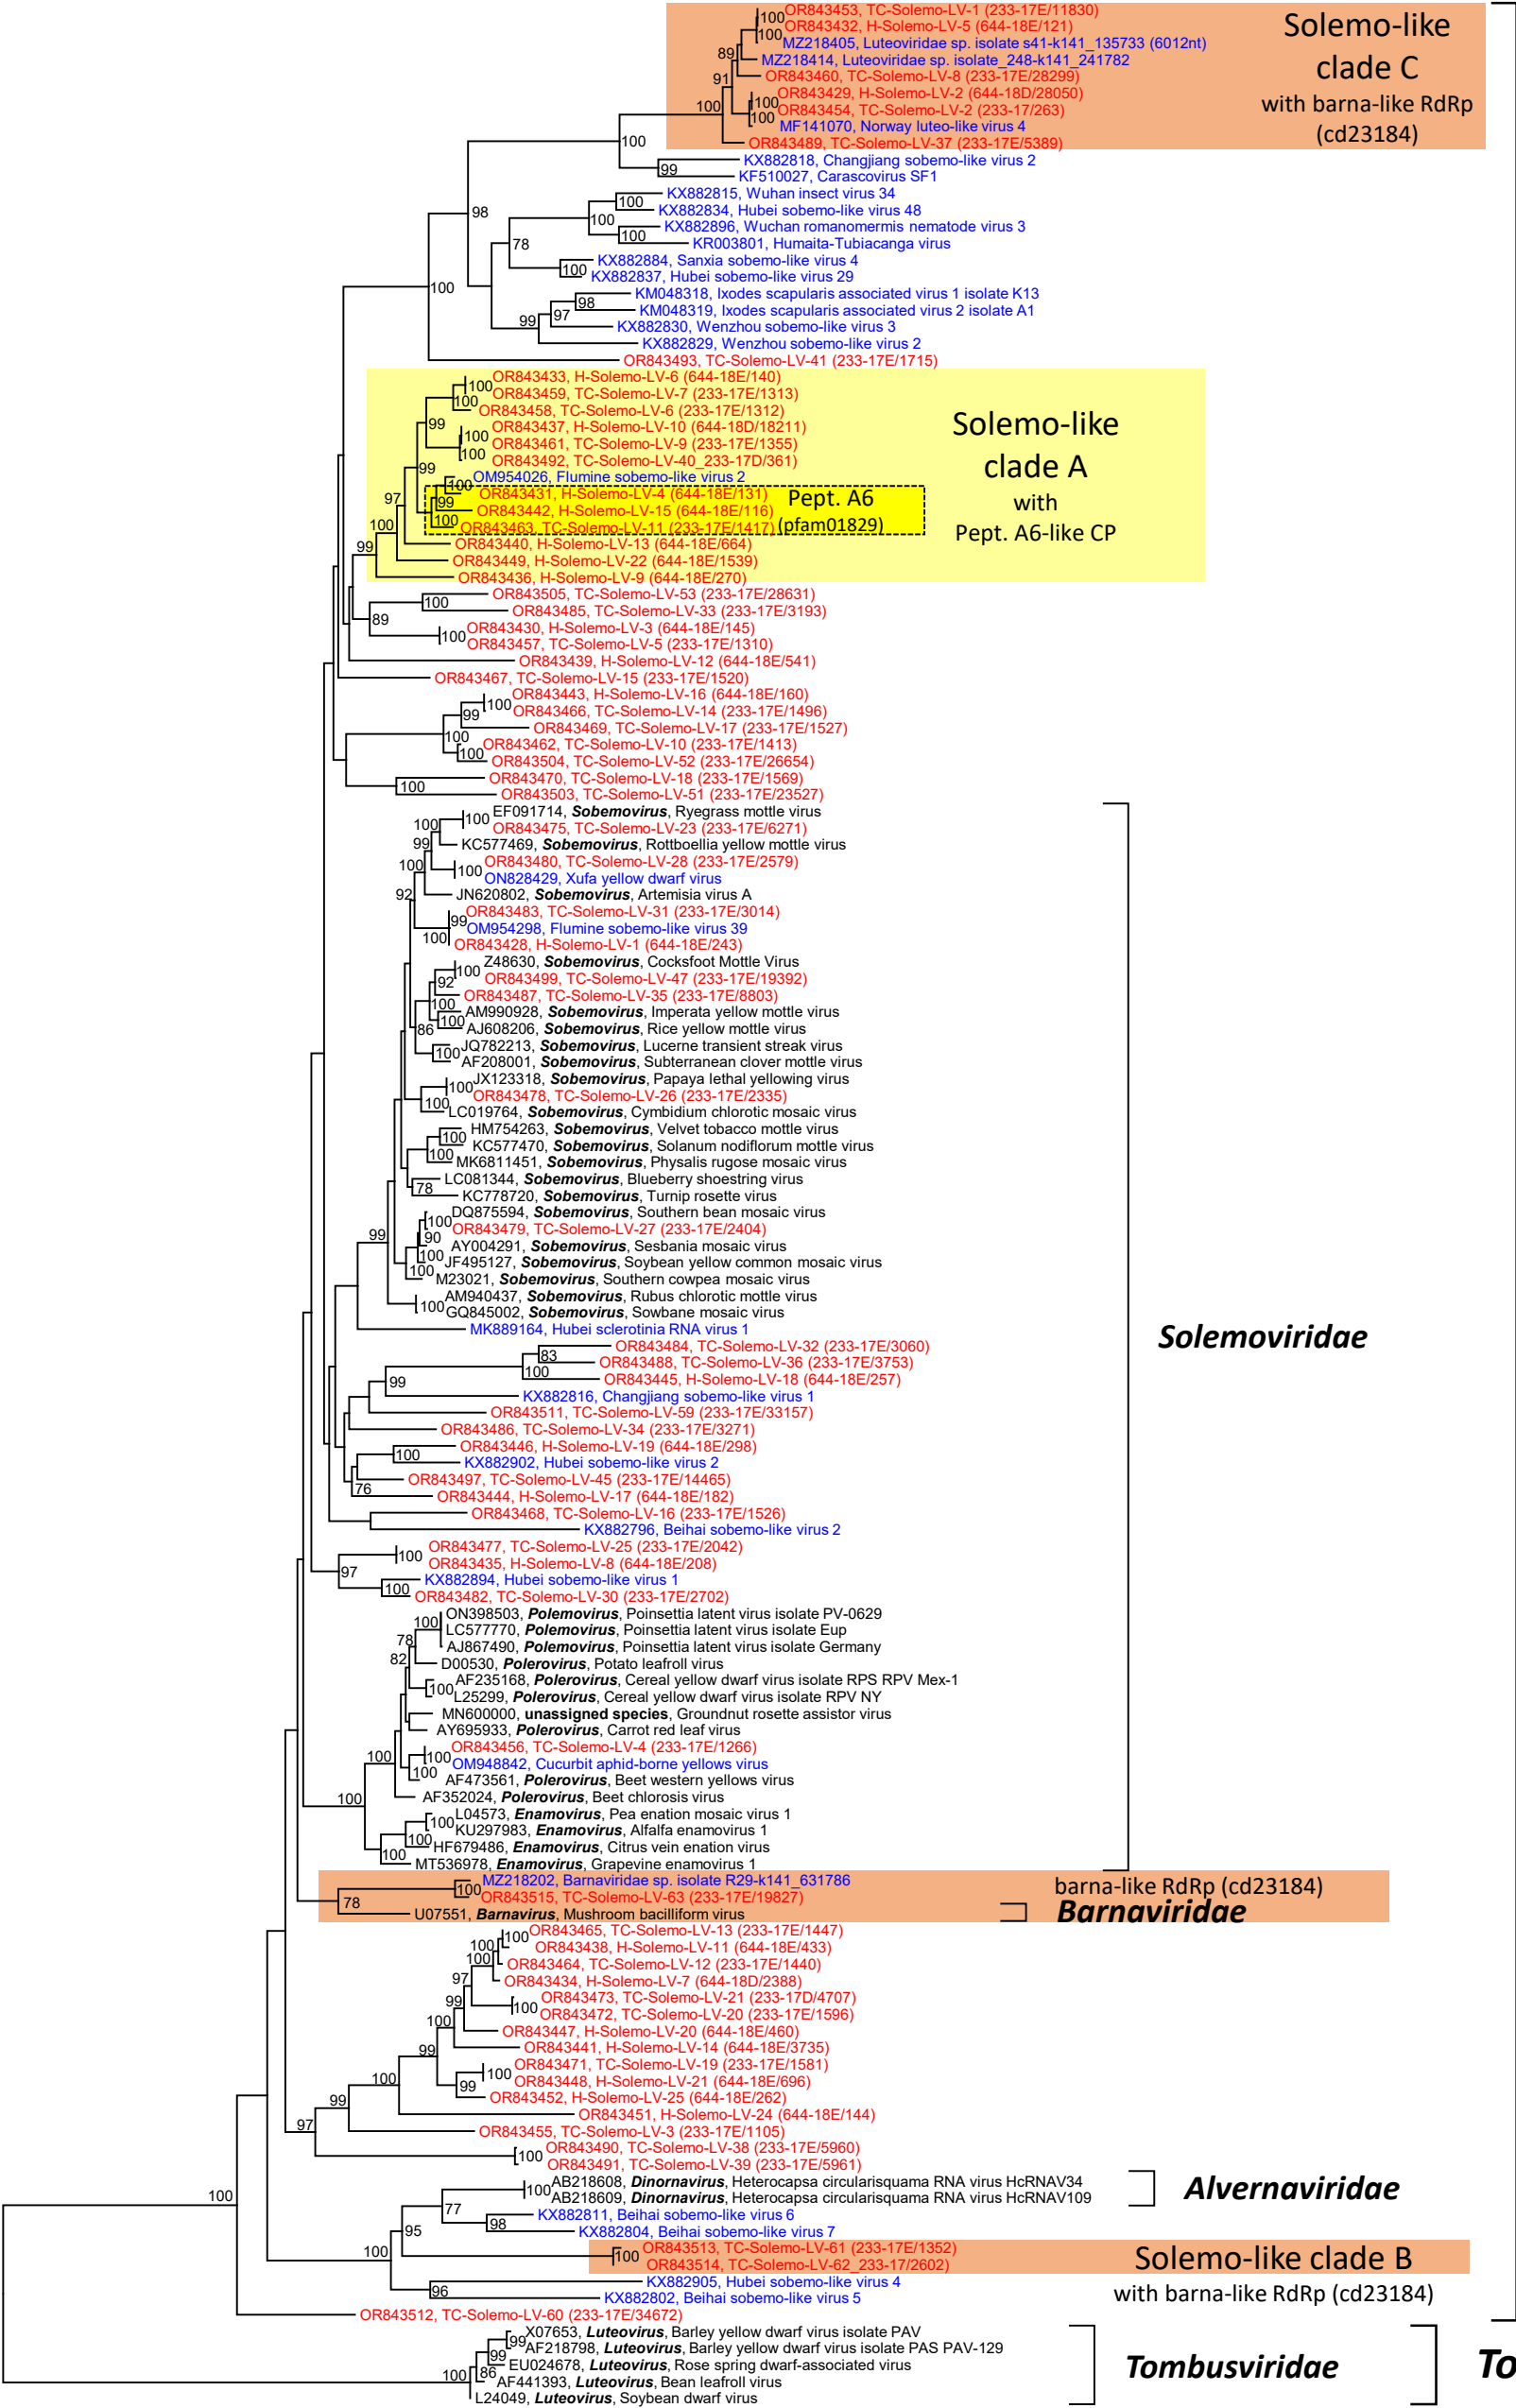

Figure S5

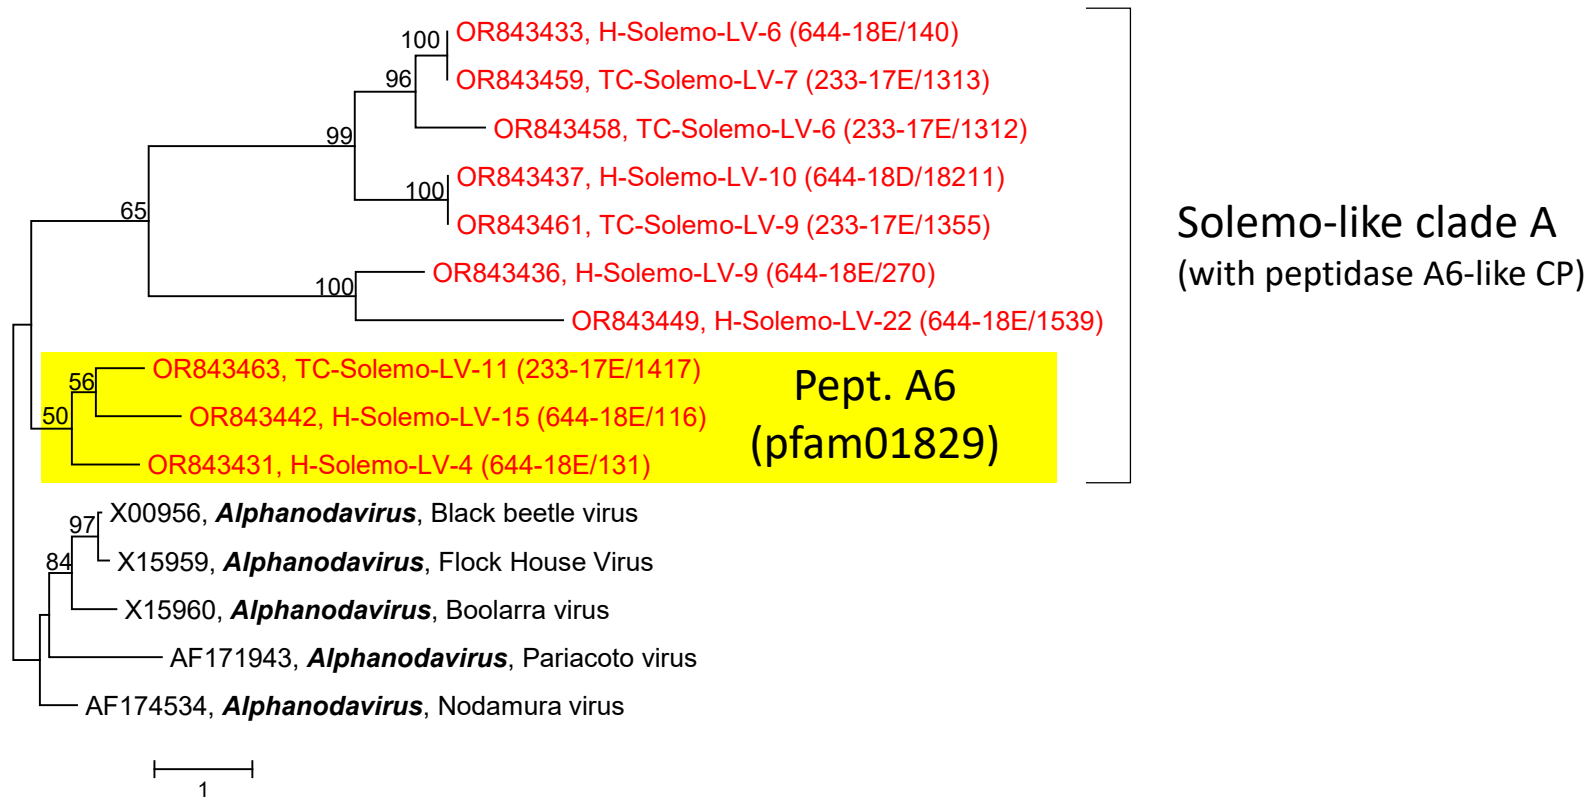



Figure S6 A

A

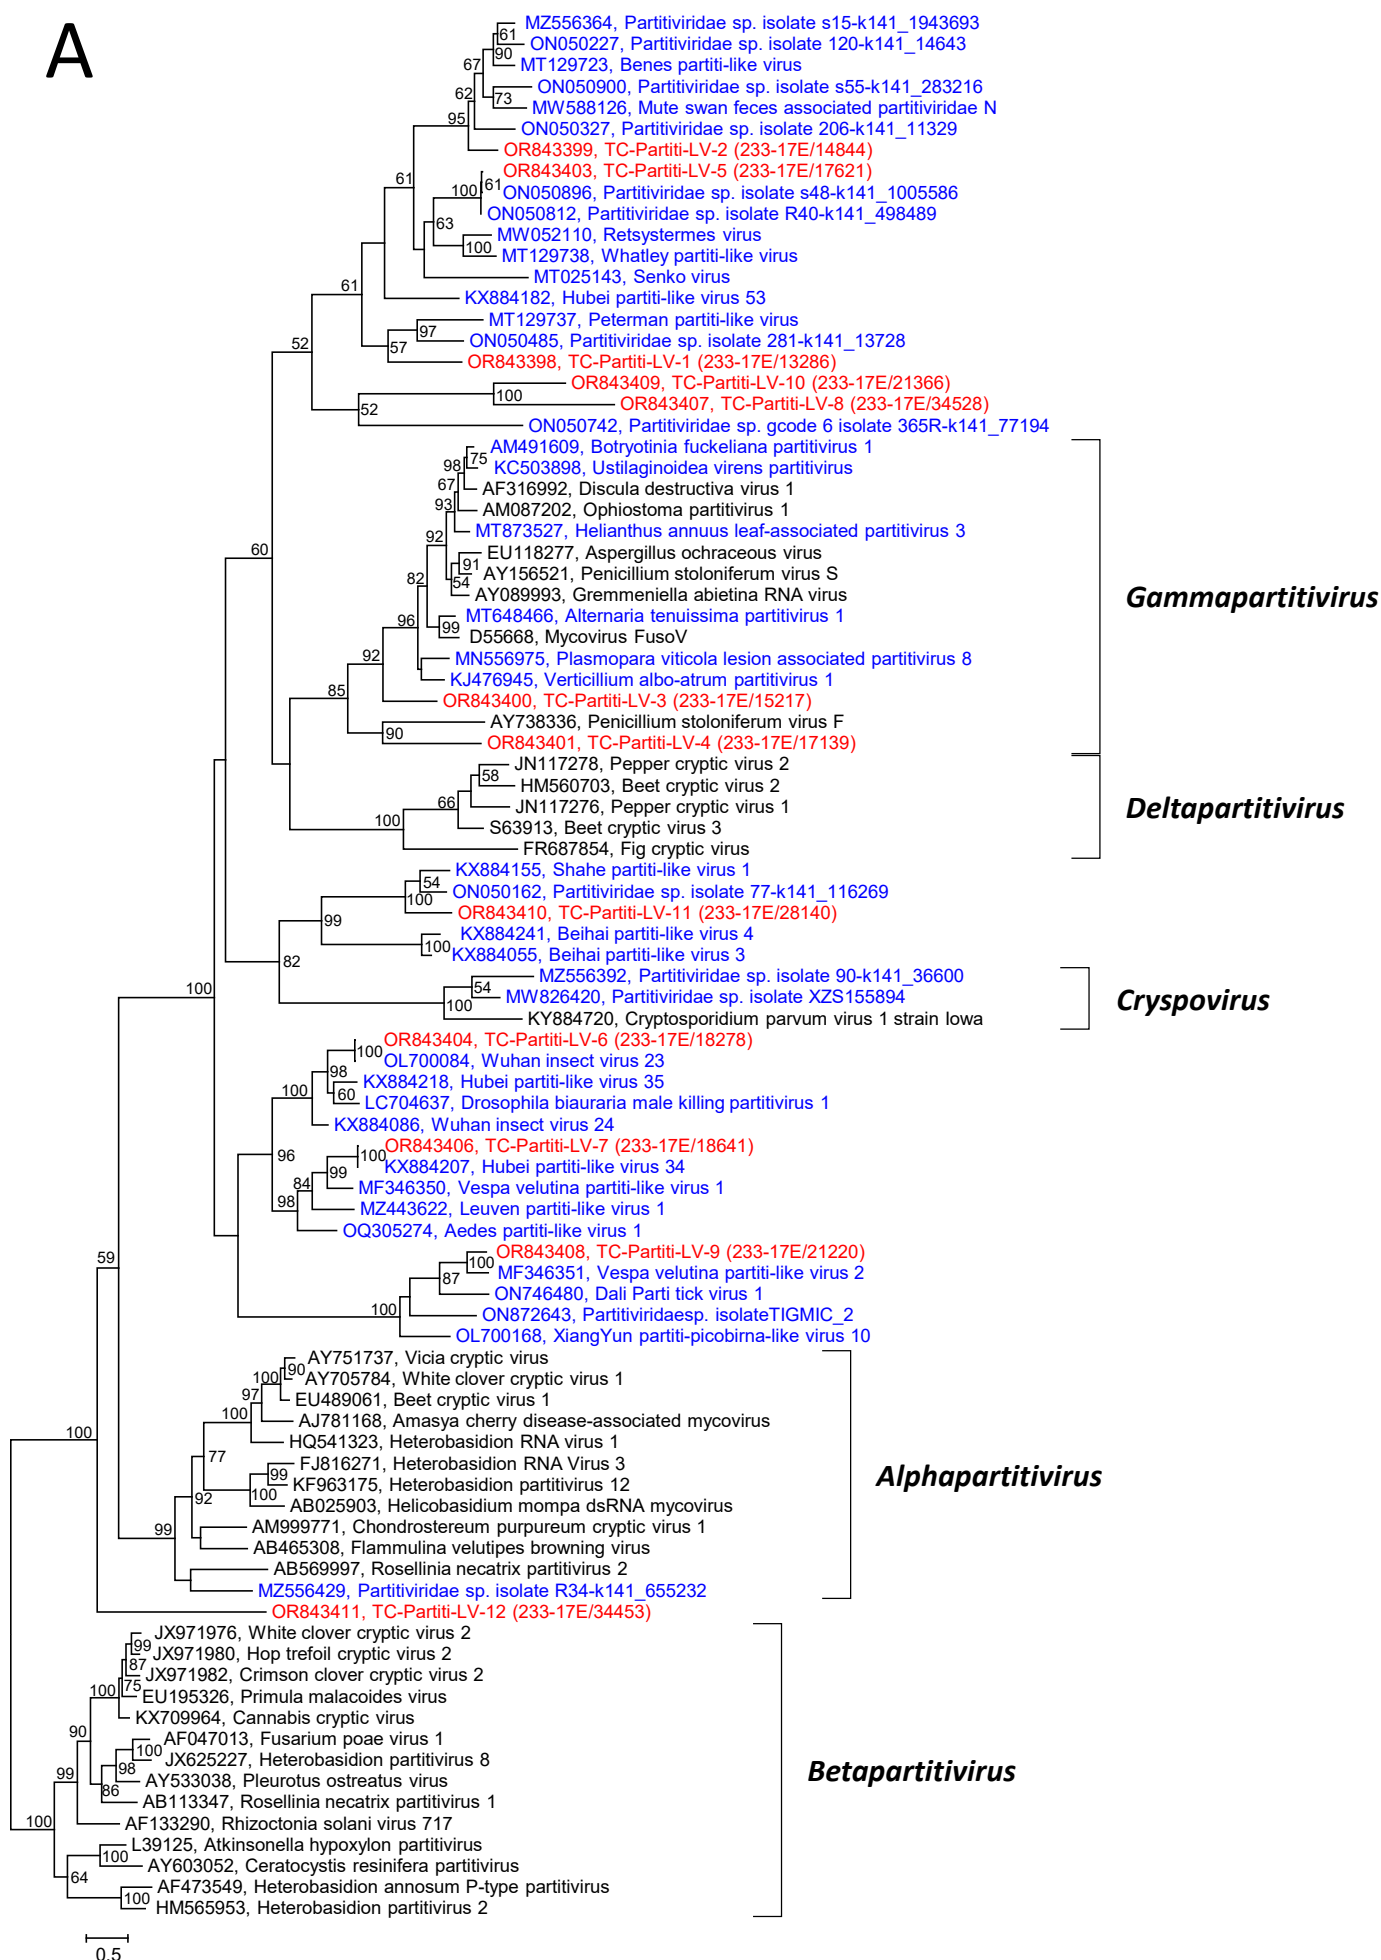

**B**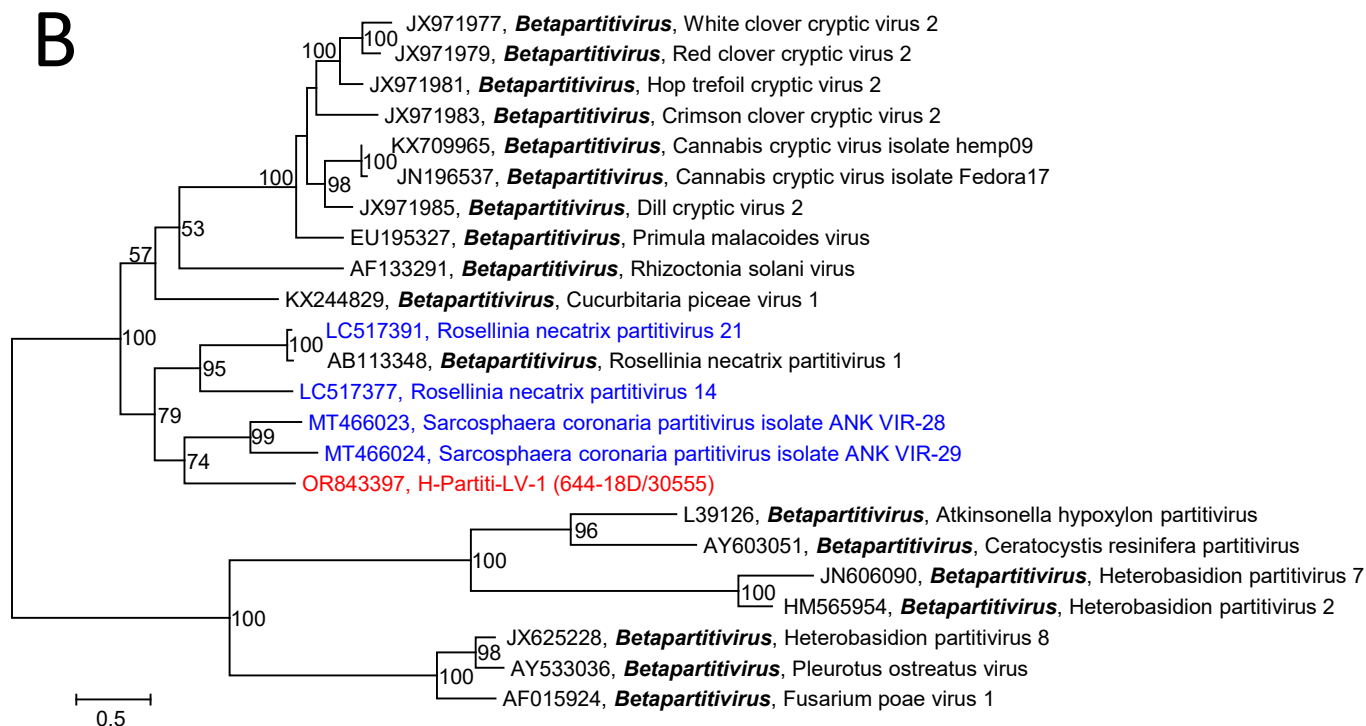**C**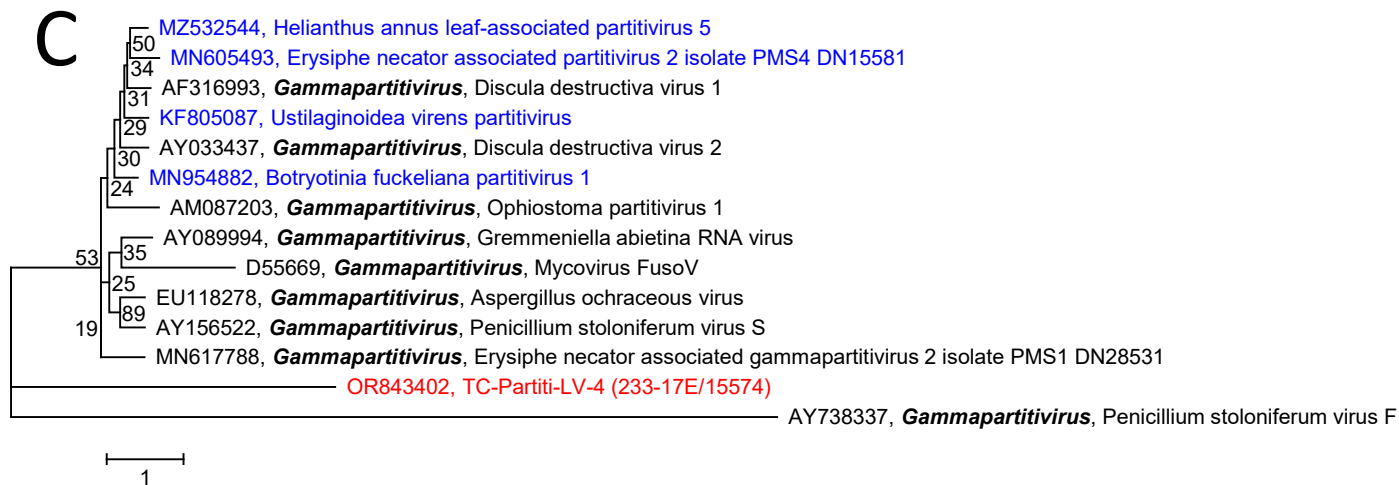**D**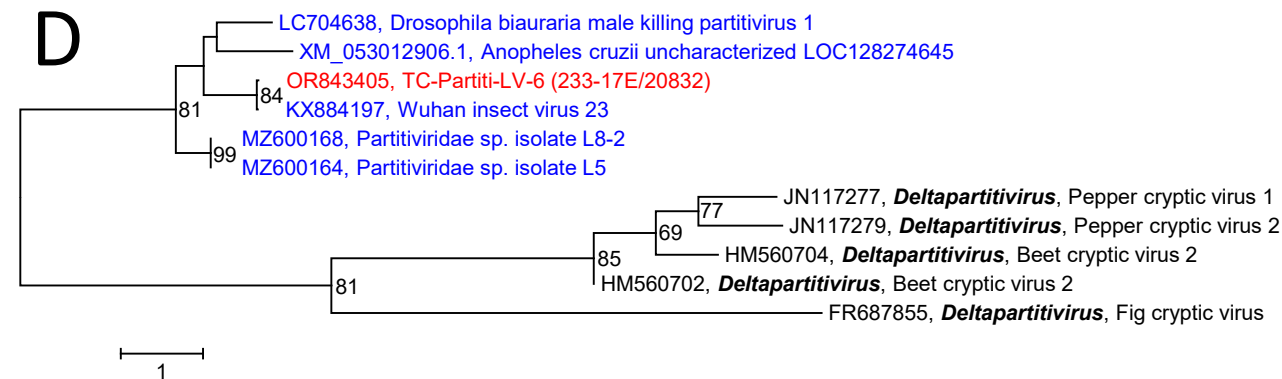

A

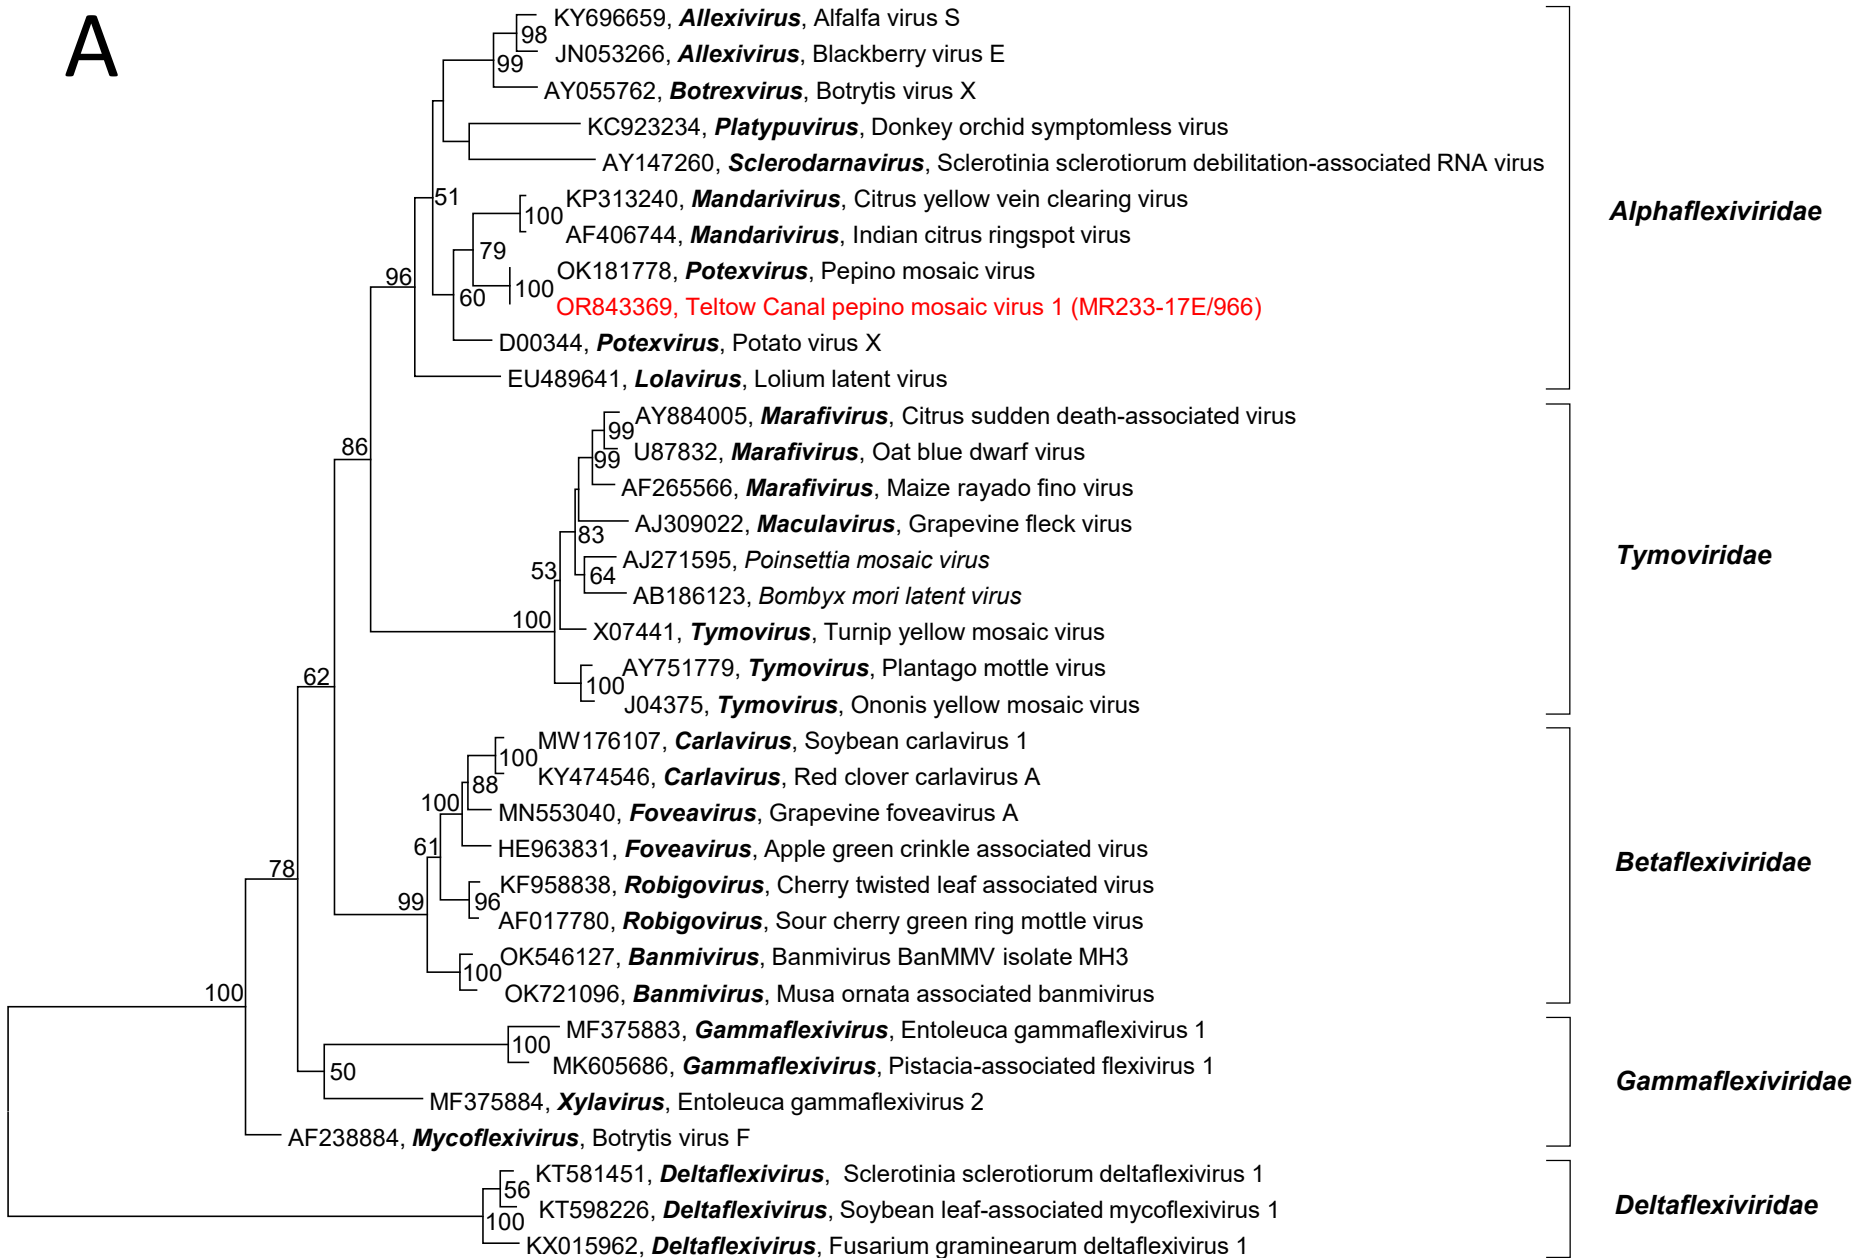

B

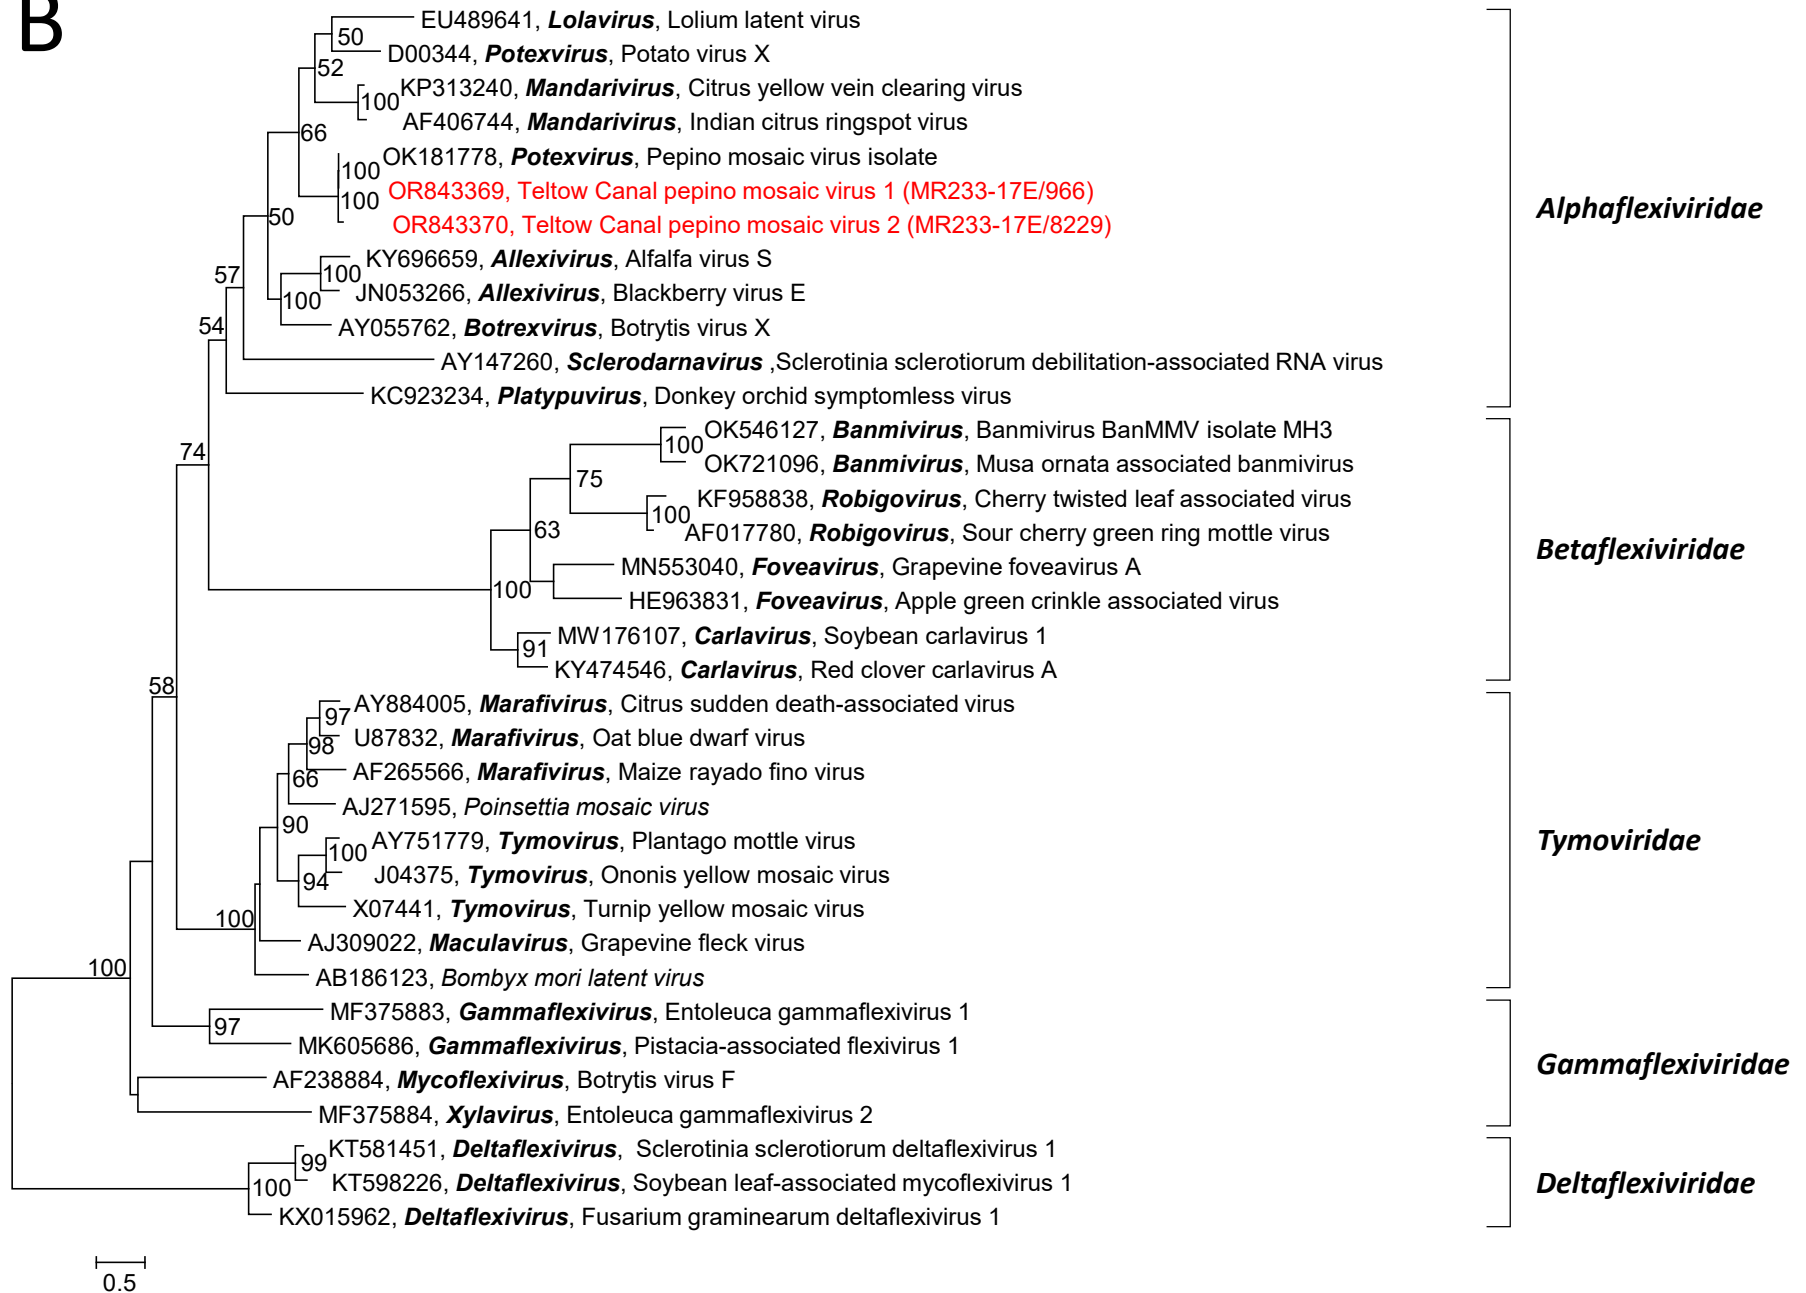

A

***Aureusvirus*****Pothos latent virus (X87115)**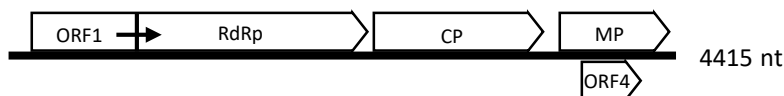**TC-Tombus-LV-34 (OR843654)**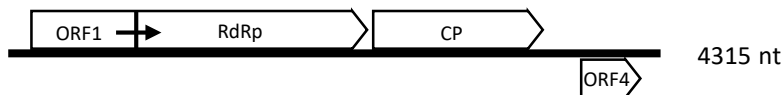**TC-Tombus-LV-61 (OR843681)**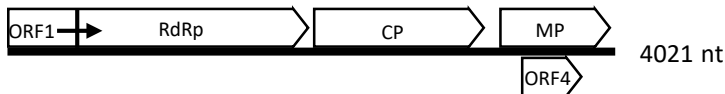***Avenavirus*****Oat chlorotic stunt virus (X83964)**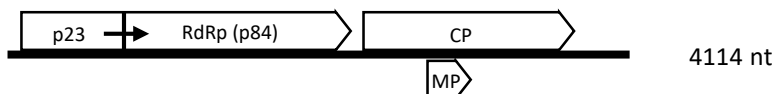**TC-Tombus-LV-47 (OR843667)**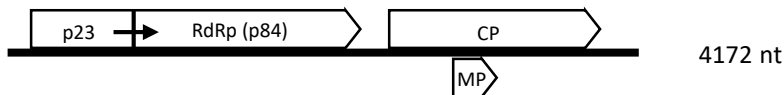**TC-Tombus-LV-162 (OR843782)**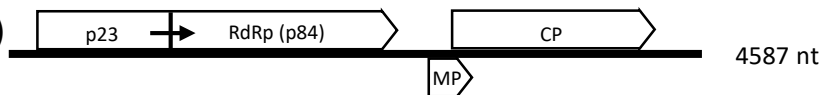***Betanecrovirus*****Beet black scorch virus (AF452884)**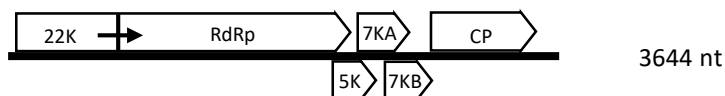**H-Tombus-LV-27 (OR843542)**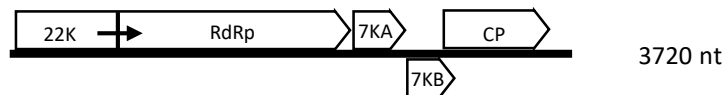***Gammacarmovirus*****Melon necrotic spot virus (M29671)**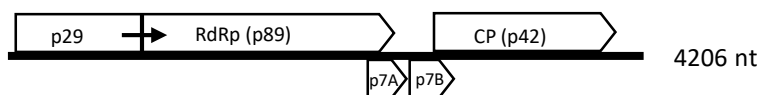**H-Tombus-LV-22 (OR843537)**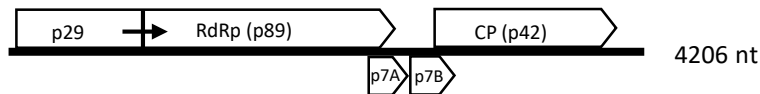***Tombusvirus*****Tomato bushy stunt virus (M21958)**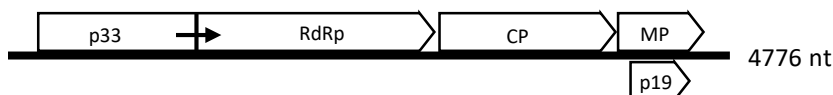**H-Tombus-LV-33 (OR843538)**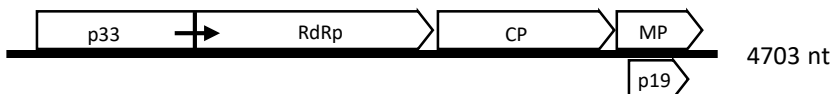



B *Luteovirus*

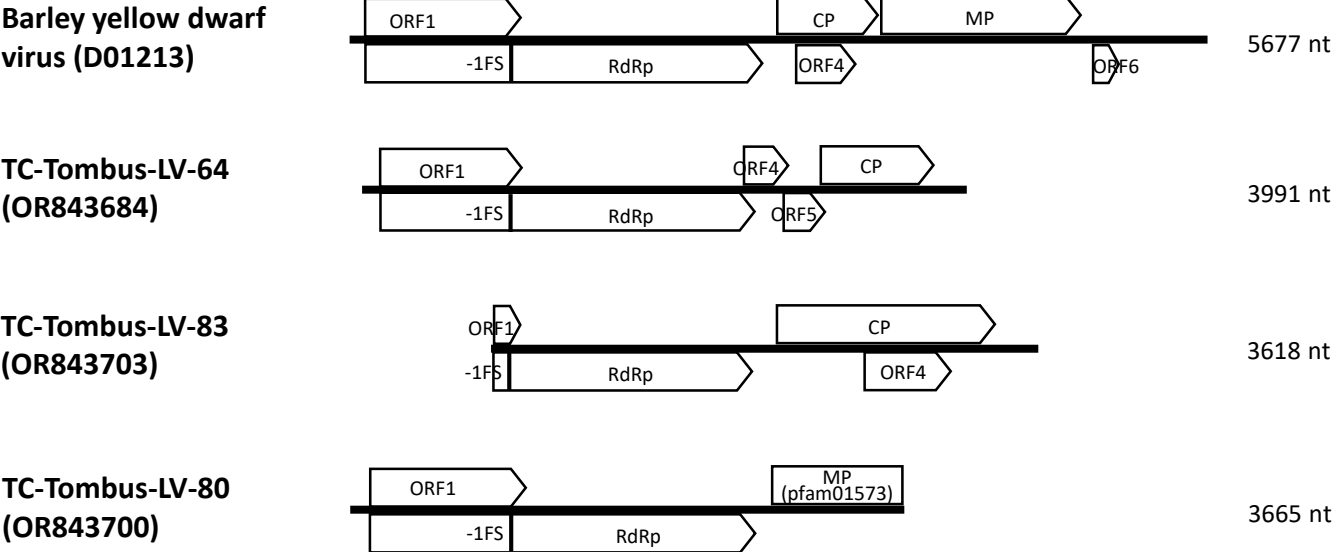

*Umbravirus*

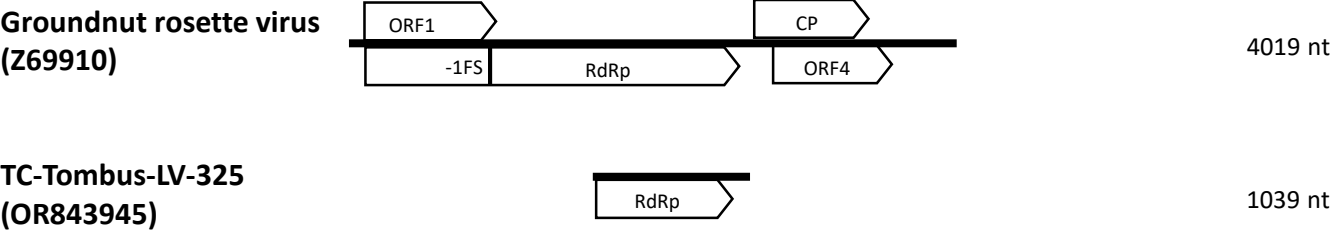

C Tombus-like clade A

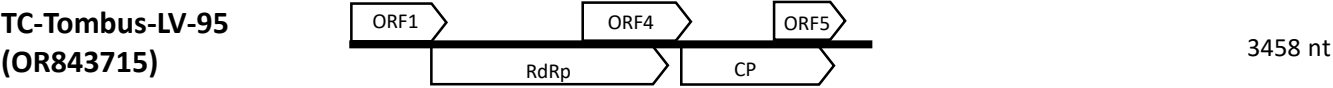

D Tombus-like viruses with methyltransferase

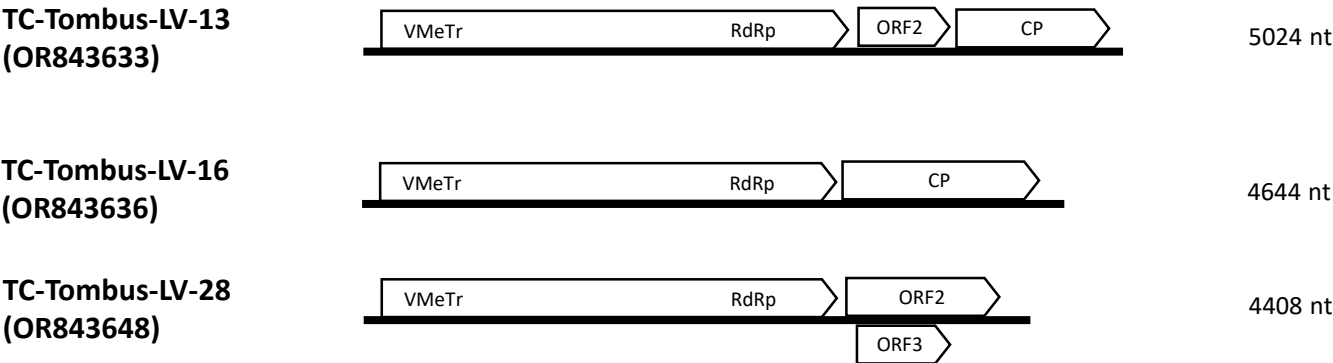

# E

## Solemo-like viruses

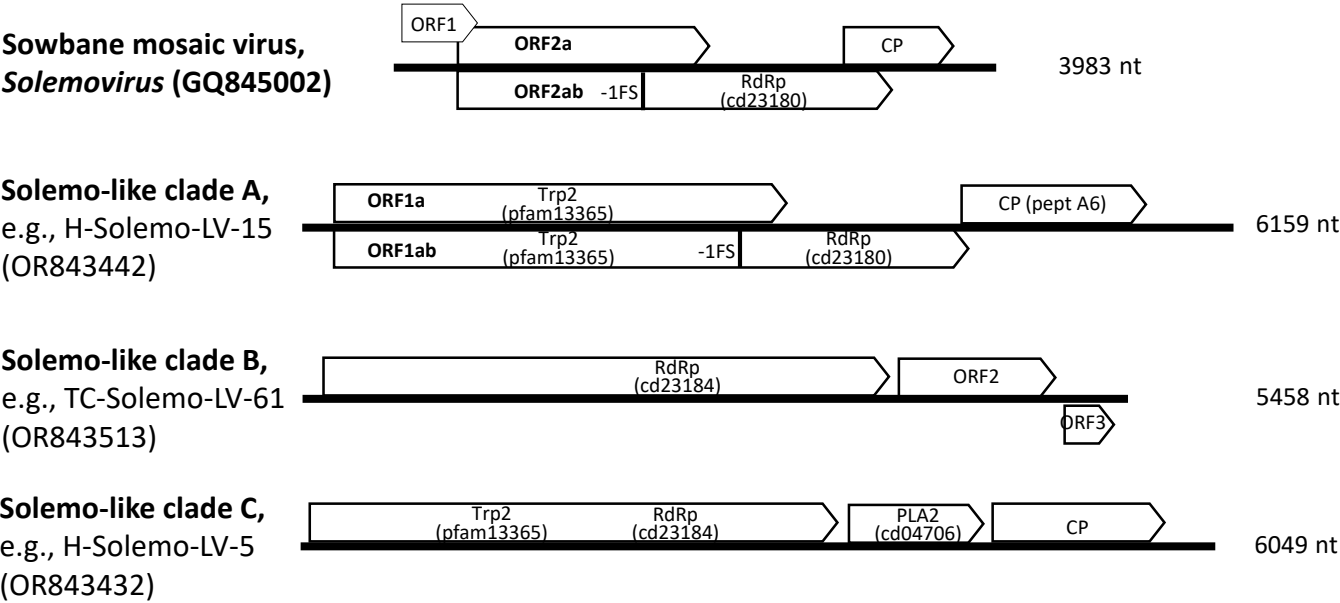

| Supplementary Table      |                                    |                  |          |                  |          |              |                                                                                                                                                                                     |
|--------------------------|------------------------------------|------------------|----------|------------------|----------|--------------|-------------------------------------------------------------------------------------------------------------------------------------------------------------------------------------|
| Related Genus/Family     | Virus                              | Strain           | Length   | GenBank acc. no. | Coverage | Mapped reads | Comment                                                                                                                                                                             |
| <b>Albetovirus</b>       | H-Albeto-LV-1                      | MR644-18E/2952   | 1312 nt  | OR843342         | 16.3948  | 160          | orf1: CP (pfam03898, cd00259); orf2-par                                                                                                                                             |
|                          | H-Albeto-LV-2                      | MR644-18E/4748   | 1093 nt  | OR843343         | 15.0192  | 120          | orf-par: CP (pfam03898, cd00259)                                                                                                                                                    |
|                          | H-Albeto-LV-3                      | MR644-18E/7375   | 909 nt   | OR843344         | 8.94939  | 58           | orf: CP (pfam03898, cd00259)                                                                                                                                                        |
|                          | H-Albeto-LV-4                      | MR644-18E/23463  | 556 nt   | OR843345         | 6.46583  | 30           | orf-par: CP (pfam03898, cd00259)                                                                                                                                                    |
|                          | TC-Albeto-LV-1                     | MR233-17E/23417  | 1272 nt  | OR843346         | 110.7660 | 998          | UGA readthrough; orf: CP (pfam03898, cd00259)                                                                                                                                       |
|                          | TC-Albeto-LV-2                     | MR233-17E/26183  | 1204 nt  | OR843347         | 26.0399  | 224          | orf-par: CP (pfam03898, cd00259)                                                                                                                                                    |
|                          | TC-Albeto-LV-3                     | MR233-17E/28086  | 1163 nt  | OR843348         | 64.8126  | 548          | orf-par: CP (pfam03898, cd00259)                                                                                                                                                    |
|                          | TC-Albeto-LV-4                     | MR233-17E/28659  | 1151 nt  | OR843349         | 21.6429  | 178          | orf: CP (pfam03898, cd00259)                                                                                                                                                        |
|                          | TC-Albeto-LV-5                     | MR233-17E/31420  | 1180 nt  | OR843350         | 13.2941  | 112          | orf-par: CP (pfam03898, cd00259)                                                                                                                                                    |
|                          | TC-Albeto-LV-6                     | MR233-17E/32763  | 1079 nt  | OR843351         | 10.873   | 82           | orf-par: CP (pfam03898, cd00259)                                                                                                                                                    |
|                          | TC-Albeto-LV-7                     | MR233-17E/33731  | 1064 nt  | OR843352         | 13.2397  | 100          | orf: CP (pfam03898, cd00259)                                                                                                                                                        |
|                          | TC-Albeto-LV-8                     | MR233-17E/41695  | 961 nt   | OR843353         | 6.29136  | 44           | orf: CP (pfam03898, cd00259)                                                                                                                                                        |
|                          | TC-Albeto-LV-9                     | MR233-17D/16470  | 1257 nt  | OR843354         | 109.527  | 986          | orf: CP (pfam03898, cd00259)                                                                                                                                                        |
|                          | TC-Albeto-LV-10                    | MR233-17D/4056   | 1220 nt  | OR843355         | 39.4475  | 352          | UGA readthrough; orf: CP (pfam03898, cd00259)                                                                                                                                       |
|                          | TC-Albeto-LV-11                    | MR233-17D/85089  | 934 nt   | OR843356         | 10.7398  | 70           | orf: CP (pfam03898, cd00259)                                                                                                                                                        |
|                          | TC-Albeto-LV-12                    | MR233-17E/64990  | 763 nt   | OR843357         | 3.82045  | 20           | orf: CP (pfam03898, cd00259)                                                                                                                                                        |
|                          | TC-Albeto-LV-13                    | MR233-17D/384198 | 873 nt   | OR843358         | 4.70218  | 30           | orf: CP (pfam03898, cd00259)                                                                                                                                                        |
|                          | TC-Albeto-LV-14                    | MR233-17E/73956  | 711 nt   | OR843359         | 5.68917  | 30           | orf-par: CP (pfam03898, cd00259)                                                                                                                                                    |
|                          | TC-Albeto-LV-15                    | MR233-17E/22895  | 1897 nt  | OR843360         | 188.807  | 2574         | orf-par: CP (pfam03898, cd00259)                                                                                                                                                    |
|                          | TC-Albeto-LV-16                    | MR233-17E/88685  | 644 nt   | OR843361         | 12.0373  | 56           | orf-par: CP (pfam03898, cd00259)                                                                                                                                                    |
|                          | TC-Albeto-LV-17                    | MR233-17E/93272  | 627 nt   | OR843362         | 6.6236   | 28           | orf-par: CP (pfam03898, cd00259)                                                                                                                                                    |
|                          | TC-Albeto-LV-18                    | MR233-17D/327169 | 595 nt   | OR843363         | 2.18487  | 10           | orf-par: CP (pfam03898, cd00259)                                                                                                                                                    |
|                          | TC-Albeto-LV-19                    | MR233-17D/8875   | 1247 nt  | OR843364         | 123.363  | 1112         | orf-par: CP (pfam03898, cd00259)                                                                                                                                                    |
|                          | TC-Albeto-LV-20                    | MR233-17E/138842 | 506 nt   | OR843365         | 2.31621  | 8            | orf-par: CP (pfam03898, cd00259)                                                                                                                                                    |
|                          | TC-Albeto-LV-21                    | MR233-17E/135569 | 901 nt   | OR843366         | 5.05882  | 30           | orf: CP (pfam03898, cd00259)                                                                                                                                                        |
|                          | TC-Albeto-LV-22                    | MR233-17E/28400  | 1156 nt  | OR843367         | 40.0882  | 334          | orf: CP (pfam03898, cd00259)                                                                                                                                                        |
|                          | TC-Albeto-LV-23                    | MR233-17D/56545  | 730 nt   | OR843368         | 3.60137  | 18           | orf: CP (pfam03898, cd00259)                                                                                                                                                        |
| <b>Alphaflexiviridae</b> | Teltow Canal pepino mosaic virus 1 | MR233-17E/966    | 6317 nt  | OR843369         | 20.9242  | 936          | orf1: VMethylTr (pfam01660), Hel1 (pfam01443), RdRp2 (pfam00978, cd23246); orf2: TRP1 (Hel1 pfam01443); orf3: TRP2 (MP pfam01307); orf4: TRP3 (pfam02495); orf5-par: CP (pfam00286) |
|                          | Teltow Canal pepino mosaic virus 2 | MR233-17E/8229   | 2153 nt  | OR843370         | 5.6828   | 86           | orf1-par: Hel1 (pfam01443)                                                                                                                                                          |
| <b>Aspiviridae</b>       | H-Aspi-LV-1                        | MR644-18D/11828  | 7284 nt  | OR843371         | 23.4395  | 1234         | RNA1; orf-par: RdRp (pfam00946)                                                                                                                                                     |
|                          | TC-Aspi-LV-1                       | MR233-17E/774    | 7082 nt  | OR843372         | 24.2749  | 1248         | RNA1; orf: RdRp (pfam00946)                                                                                                                                                         |
|                          | TC-Aspi-LV-2                       | MR233-17E/24594  | 1242 nt  | OR843373         | 4.5709   | 38           | RNA1; orf-par: RdRp (pfam00946)                                                                                                                                                     |
|                          | TC-Aspi-LV-3                       | MR233-17E/8303   | 2142 nt  | OR843374         | 5.1881   | 82           | RNA1; orf-par: RdRp (pfam00946)                                                                                                                                                     |
| <b>Bromoviridae</b>      | TC-Bromo-LV-1                      | MR233-17E/20882  | 1344 nt  | OR843375         | 33.7723  | 320          | RNA3; orf: movement protein (pfam01573)                                                                                                                                             |
|                          | TC-Bromo-LV-2                      | MR233-17E22280   | 1303 nt  | OR843376         | 34.8734  | 330          | RNA3; orf-par: movement protein (pfam01573)                                                                                                                                         |
| <b>Endornaviridae</b>    | TC-Endorna-LV-1                    | MR233-17E/63     | 15160 nt | OR843377         | 948.767  | 104848       | orf1-par: RdRp2 (pfam00978, cd23255); orf2-par                                                                                                                                      |
|                          | TC-Endorna-LV-2                    | MR233-17E/76     | 14026 nt | OR843378         | 76.1062  | 7712         | orf-par: Hel1 (pfam01443), RdRp2 (pfam00978, cd23255)                                                                                                                               |
|                          | TC-Endorna-LV-3                    | MR233-17E/80     | 13469 nt | OR843379         | 29.2984  | 2878         | orf-par: Hel1 (pfam01443), UDP-glycosyltransferase (cd03784, COG1819), RdRp2 (pfam00978, cd23255)                                                                                   |
|                          | TC-Endorna-LV-4                    | MR233-17E/81     | 13449 nt | OR843380         | 140.376  | 13534        | orf-par: Hel1 (pfam01443), RdRp2 (pfam00978, cd23255)                                                                                                                               |
|                          | TC-Endorna-LV-5                    | MR233-17E/93     | 13085 nt | OR843381         | 23.2727  | 2198         | orf-par: Hel1 (pfam01443), RdRp2 (pfam00978, cd23255)                                                                                                                               |
|                          | TC-Endorna-LV-6                    | MR233-17E/847    | 6769 nt  | OR843382         | 52.3021  | 2526         | suppression of UAG and UAA codons; orf-par: Hel1 (pfam01443)                                                                                                                        |
|                          | TC-Endorna-LV-7                    | MR233-17E/1061   | 6083 nt  | OR843383         | 76.1093  | 3284         | orf-par: RdRp2 (pfam00978, cd23255)                                                                                                                                                 |
|                          | TC-Endorna-LV-8                    | MR233-17E/1548   | 5088 nt  | OR843384         | 12.2415  | 450          | suppression of UAG and UAA codons; orf-par: Hel1 (pfam01443)                                                                                                                        |
|                          | TC-Endorna-LV-9                    | MR233-17E/1838   | 4676 nt  | OR843385         | 12.2062  | 410          | orf-par: Hel1 (pfam01443)                                                                                                                                                           |
|                          | TC-Endorna-LV-10                   | MR233-17E/1990   | 4480 nt  | OR843386         | 30.3272  | 992          | orf-par: RdRp2 (pfam00978, cd23255)                                                                                                                                                 |
|                          | TC-Endorna-LV-11                   | MR233-17E/2180   | 4283 nt  | OR843387         | 20.834   | 638          | suppression of UAG and UAA codons; orf-par                                                                                                                                          |
|                          | TC-Endorna-LV-12                   | MR233-17E/2372   | 4091 nt  | OR843388         | 29.4632  | 870          | suppression of UAG and UAA codons; orf-par: RdRp2 (pfam00978, cd23255)                                                                                                              |
|                          | TC-Endorna-LV-13                   | MR233-17E/2418   | 4059 nt  | OR843389         | 121.735  | 3536         | suppression of UAG and UAA codons + UGA readthrough; orf-par: RdRp2 (pfam00978, cd23255)                                                                                            |
|                          | TC-Endorna-LV-14                   | MR233-17E/4097   | 3124 nt  | OR843390         | 14.3857  | 330          | orf-par: Hel1 (pfam01443)                                                                                                                                                           |
|                          | TC-Endorna-LV-15                   | MR233-17E/4432   | 2984 nt  | OR843391         | 33.51.91 | 716          | suppression of UAG and UAA codons; orf-par: RdRp2 (pfam00978, cd23255)                                                                                                              |
|                          | TC-Endorna-LV-16                   | MR233-17E/5308   | 2278 nt  | OR843392         | 11.1173  | 218          | orf-par: RdRp2 (pfam00978, cd23255)                                                                                                                                                 |
|                          | TC-Endorna-LV-17                   | MR233-17E/7446   | 2268 nt  | OR843393         | 16.4101  | 270          | orf-par: RdRp2 (pfam00978, cd23255)                                                                                                                                                 |
|                          | TC-Endorna-LV-18                   | MR233-17E/9238   | 2030 nt  | OR843394         | 17.8906  | 262          | orf-par: RdRp2 (pfam00978, cd23255)                                                                                                                                                 |

|                       |                  |                 |          |          |         |        |                                                                                                                                                        |
|-----------------------|------------------|-----------------|----------|----------|---------|--------|--------------------------------------------------------------------------------------------------------------------------------------------------------|
|                       | TC-Endorna-LV-19 | MR233-17E/133   | 11565 nt | OR843395 | 24.6337 | 2020   | suppression of UAG and UAA codons + UGA readthrough; orf-par: Hel1 (pfam01443), UDP-glycosyltransferase (cd03784, COG1819); RdRp2 (pfam00978, cd23255) |
|                       | TC-Endorna-LV-20 | MR233-17E/206   | 10286 nt | OR843396 | 23.1245 | 1728   | suppression of UAG and UAA codons; orf-par: UDP-glycosyltransferase (cd03784, COG1819), RdRp2 (pfam00978, cd23255)                                     |
| <b>Partitiviridae</b> | H-Partiti-LV-1   | MR644-18D/30555 | 1805 nt  | OR843397 | 7.33407 | 94     | dsRNA2; orf-par: CP                                                                                                                                    |
|                       | TC-Partiti-LV1   | MR233-17E/13286 | 1689 nt  | OR843398 | 33.5565 | 430    | dsRNA1; orf: RdRp1 (pfam00680, cd01699)                                                                                                                |
|                       | TC-Partiti-LV-2  | MR233-17E/14844 | 1595 nt  | OR843399 | 47.4517 | 624    | dsRNA1; orf: RdRp1 (pfam00680, cd01699)                                                                                                                |
|                       | TC-Partiti-LV-3  | MR233-17E/15217 | 1576 nt  | OR843400 | 17.7747 | 204    | dsRNA1; orf-par: RdRp1 (pfam00680, cd01699)                                                                                                            |
|                       | TC-Partiti-LV-4  | MR233-17E/17139 | 1485 nt  | OR843401 | 9.96162 | 104    | dsRNA1; orf-par: RdRp1 (pfam00680, cd01699)                                                                                                            |
|                       |                  | MR233-17E/15574 | 1559 nt  | OR843402 | 17.771  | 206    | dsRNA2; orf: CP                                                                                                                                        |
|                       | TC-Partiti-LV-5  | MR233-17E/17621 | 1465 nt  | OR843403 | 142.902 | 1608   | dsRNA1; orf: RdRp1 (pfam00680, cd01699)                                                                                                                |
|                       | TC-Partiti-LV-6  | MR233-17E/18278 | 1438 nt  | OR843404 | 11.8039 | 118    | dsRNA1; orf-par: RdRp1 (pfam00680, cd01699)                                                                                                            |
|                       |                  | MR233-17E/20832 | 1346 nt  | OR843405 | 11.9354 | 118    | dsRNA2; orf-par: CP                                                                                                                                    |
|                       | TC-Partiti-LV-7  | MR233-17E/18641 | 1424 nt  | OR843406 | 22.4796 | 226    | dsRNA1; orf: RdRp1 (pfam00680, cd01699)                                                                                                                |
|                       | TC-Partiti-LV-8  | MR233-17E/34528 | 1052 nt  | OR843407 | 8.23954 | 64     | dsRNA1; orf-par: RdRp1 (pfam00680, cd01699)                                                                                                            |
|                       | TC-Partiti-LV-9  | MR233-17E/21220 | 1334 nt  | OR843408 | 41.4798 | 402    | dsRNA1; orf: RdRp1 (pfam00680, cd01699)                                                                                                                |
|                       | TC-Partiti-LV-10 | MR233-17E/21366 | 1330 nt  | OR843409 | 12.7053 | 120    | dsRNA1; orf-par: RdRp1 (pfam00680, cd01699)                                                                                                            |
| <b>Potyviridae</b>    | TC-Partiti-LV-11 | MR233-17E/28140 | 1162 nt  | OR843410 | 11.6291 | 94     | dsRNA1; orf-par: RdRp1 (pfam00680, cd01699)                                                                                                            |
|                       | TC-Partiti-LV-12 | MR233-17E/34453 | 1605 nt  | OR843411 | 10.5768 | 116    | dsRNA1; orf: RdRp1 (pfam00680, cd01699)                                                                                                                |
|                       | TC-Poty-LV-1     | MR233-17E/846   | 6770 nt  | OR843412 | 81.3059 | 3918   | orf1-par: prot (G <sub>1033</sub> XCGxxxxxxxxxxxxGxH); orf2: RdRp1 (pfam00680, cd01699), CP (pfam00729)                                                |
|                       | TC-Poty-LV-2     | MR233-17E/11278 | 5912 nt  | OR843413 | 11.9545 | 496    | orf1-par: prot (G <sub>837</sub> XCGxxxxxxxxxxxxGxH); orf2: RdRp1 (pfam00680, cd23175)                                                                 |
|                       | TC-Poty-LV-3     | MR233-17E/7275  | 2296 nt  | OR843414 | 6.56228 | 110    | orf1-par: RdRp1 (pfam00680, cd01699); orf2-par: CP (pfam00729); orf3                                                                                   |
|                       | TC-Poty-LV-4     | MR233-17E/629   | 7838 nt  | OR843415 | 2411.83 | 134754 | orf1-par: trypsin 2 (pfam13365), RdRp1 (pfam00680, cd01699); orf2                                                                                      |
|                       | TC-Poty-LV-5     | MR233-17E/706   | 7389 nt  | OR843416 | 53.4595 | 2816   | orf1-par: prot (G <sub>1203</sub> XCGxxxxxxxxxxxxxxxxxxxxxxxxGxH); orf2: RdRp1 (pfam00680, cd23175)                                                    |
|                       | TC-Poty-LV-6     | MR233-17E/749   | 7140 nt  | OR843417 | 39.6062 | 2020   | orf1-par: prot? (G <sub>342</sub> XSG); orf2: RdRp1 (pfam00680, cd23175), CP (pfam00729)                                                               |
|                       | TC-Poty-LV-7     | MR233-17E/790   | 6983 nt  | OR843418 | 31.0443 | 1546   | orf1-par; orf2: RdRp1 (pfam00680, cd23175), CP (pfam00729)                                                                                             |
|                       | TC-Poty-LV-8     | MR233-17E/798   | 6947 nt  | OR843419 | 116.926 | 5832   | orf1-par; orf2: RdRp1 (pfam00680, cd23175), CP (pfam00729)                                                                                             |
|                       | TC-Poty-LV-9     | MR233-17E/794   | 6969 nt  | OR843420 | 46.267  | 2310   | orf1-par; orf2: RdRp1 (pfam00680, cd23175), CP (pfam00729)                                                                                             |
|                       | TC-Poty-LV-10    | MR233-17E/860   | 6718 nt  | OR843421 | 533.091 | 25662  | orf1-par; orf2: RdRp1 (pfam00680, cd01699), CP (pfam00729)                                                                                             |
|                       | TC-Poty-LV-11    | MR233-17E/915   | 6524 nt  | OR843422 | 49.7784 | 2310   | orf1-par; orf2: RdRp1 (pfam00680, cd23175), CP (pfam00729)                                                                                             |
|                       | TC-Poty-LV-12    | MR233-17E/1300  | 5548 nt  | OR843423 | 27.0319 | 1076   | orf-par: RdRp1 (pfam00680, cd23175), CP (pfam00729)                                                                                                    |
|                       | TC-Poty-LV-13    | MR233-17E/1549  | 5082 nt  | OR843424 | 16.06   | 584    | orf1: Peptidase C4 (pfam00863); orf2-par: RdRp1 (pfam00680, cd23175), CP (pfam00729)                                                                   |
|                       | TC-Poty-LV-14    | MR233-17E/2352  | 7221 nt  | OR843425 | 78.8446 | 4100   | orf1-par; orf2: RdRp1 (pfam00680, cd23169), CP (pfam00729)                                                                                             |
|                       | TC-Poty-LV-15    | MR233-17E/3501  | 4053 nt  | OR843426 | 15.586  | 452    | orf1-par: trypsin 2 (pfam13365); orf2: RdRp1 (pfam00680, cd23175); orf3                                                                                |
|                       | TC-Poty-LV-16    | MR233-17E/11552 | 2281 nt  | OR843427 | 16.2679 | 262    | orf1-par; orf2-par: RdRp1 (pfam00680, cd23175)                                                                                                         |
| <b>Solemoviridae</b>  | H-Solemo-LV-1    | MR644-18E/243   | 4297 nt  | OR843428 | 30.9367 | 968    | orf1; orf2: Trypsin 2 (pfam13365); orf3: RdRp4 (pfam02123, cd23180); orf4: CP (pfam00729)                                                              |
|                       | H-Solemo-LV-2    | MR644-18D/28050 | 5913 nt  | OR843429 | 13.0908 | 554    | orf1: Barnaviridae-RdRp (cd23184); orf2: parvo coat N (pfam08398); orf3-par: CP (pfam00729)                                                            |
|                       | H-Solemo-LV-3    | MR644-18E/145   | 5532 nt  | OR843430 | 63.9817 | 2596   | orf2-par; orf3: RdRp4 (pfam02123, cd23180); orf4                                                                                                       |
|                       | H-Solemo-LV-4    | MR644-18E/131   | 5710 nt  | OR843431 | 39.2278 | 1676   | orf1: Trypsin 2 (pfam13365); orf2: RdRp4 (pfam02123, cd23180); orf3: Peptidase A6 (pfam01829)                                                          |
|                       | H-Solemo-LV-5    | MR644-18E/121   | 6049 nt  | OR843432 | 93.0665 | 4198   | orf1: Trypsin 2 (pfam13365), Barnaviridae-RdRp (cd23184); orf2: phospholipase A2-like (cd04706); orf3: CP (pfam00729)                                  |
|                       | H-Solemo-LV-6    | MR644-18E/140   | 5584 nt  | OR843433 | 186.344 | 7846   | orf1: Peptidase S39 (pfam02122); orf2: RdRp4 (pfam02123, cd23180); orf3                                                                                |
|                       | H-Solemo-LV-7    | MR644-18D/2388  | 5554 nt  | OR843434 | 94.7533 | 3816   | orf1-par; orf2: RdRp4 (pfam02123, cd23180); orf3: CP (pfam00729)                                                                                       |
|                       | H-Solemo-LV-8    | MR644-18E/208   | 4641 nt  | OR843435 | 37.526  | 1254   | orf1-par: Trypsin 2 (pfam13365); orf2: RdRp4 (pfam02123, cd23180); orf3: CP (pfam00729)                                                                |
|                       | H-Solemo-LV-9    | MR644-18E/270   | 4135 nt  | OR843436 | 10.9241 | 326    | orf1-par: Trypsin 2 (pfam13365); orf2: RdRp4 (pfam02123, cd23180); orf3-par                                                                            |
|                       | H-Solemo-LV-10   | MR644-18D/18211 | 5376 nt  | OR843437 | 63.4407 | 2462   | orf1: Trypsin 2 (pfam13365); orf2: RdRp4 (pfam02123, cd23180); orf3                                                                                    |
|                       | H-Solemo-LV-11   | MR644-18E/433   | 5386 nt  | OR843438 | 147.962 | 5814   | orf1-par; orf2: RdRp (cd23180); orf3: CP (pfam00729)                                                                                                   |
|                       | H-Solemo-LV-12   | MR644-18/541    | 2888 nt  | OR843439 | 15.2961 | 316    | orf-par: RdRp4 (pfam02123, cd23180), CP (pfam00729)                                                                                                    |
|                       | H-Solemo-LV-13   | MR644-18E/664   | 2571 nt  | OR843440 | 12.942  | 244    | orf1-par: Protease? (G <sub>83</sub> XSGxxxxxxxxxxxxGxH), orf2-par: RdRp4 (pfam02123, cd23180)                                                         |
|                       | H-Solemo-LV-14   | MR644-18E/3735  | 1195 nt  | OR843441 | 4.9523  | 42     | orf-par: RdRp4 (pfam02123, cd23180)                                                                                                                    |

|                 |                 |         |          |         |         |                                                                                                                                                                                                  |
|-----------------|-----------------|---------|----------|---------|---------|--------------------------------------------------------------------------------------------------------------------------------------------------------------------------------------------------|
| H-Solemo-LV-15  | MR644-18E/116   | 6159 nt | OR843442 | 50.4269 | 2274    | orf1: Trypsin 2 (pfam13365); orf2: RdRp4 (pfam02123, cd23180); orf3: Peptidase A6 (pfam01829)                                                                                                    |
| H-Solemo-LV-16  | MR644-18E/160   | 5245 nt | OR843443 | 227.527 | 8892    | orf2-par; orf3: RdRp4 (pfam02123, cd23180); orf4                                                                                                                                                 |
| H-Solemo-LV-17  | MR644-18E/182   | 4936 nt | OR843444 | 219.137 | 7830    | orf1: Trypsin 2 (pfam13365); orf2: RdRp4 (pfam02123, cd23180); orf3: CP (pfam00729)                                                                                                              |
| H-Solemo-LV-18  | MR644-18E/257   | 4209 nt | OR843445 | 75.4688 | 2314    | orf1; orf2: RdRp (cd23180); orf3                                                                                                                                                                 |
| H-Solemo-LV-19  | MR644-18E/298   | 3934 nt | OR843446 | 36.457  | 1042    | orf1-par: Trypsin 2 (pfam13365); orf2: RdRp4 (pfam02123, cd23180); orf3                                                                                                                          |
| H-Solemo-LV-20  | MR644-18E/460   | 3118 nt | OR843447 | 13.1947 | 296     | orf1-par; orf2-par: RdRp (cd23180)                                                                                                                                                               |
| H-Solemo-LV-21  | MR644-18D/30335 | 3258 nt | OR843448 | 9.76182 | 230     | orf1-par; orf2: RdRp4 (pfam02123, cd23180); orf3-par: CP (pfam00729)                                                                                                                             |
| H-Solemo-LV-22  | MR644-18E/1539  | 1709 nt | OR843449 | 9.05442 | 110     | orf1-par: RdRp4 (pfam02123, cd23123); orf2-par                                                                                                                                                   |
| H-Solemo-LV-23  | MR644-18E/2695  | 1356 nt | OR843450 | 10.1202 | 100     | orf1: CP (pfam00729); orf2                                                                                                                                                                       |
| H-Solemo-LV-24  | MR644-18E/144   | 5542 nt | OR843451 | 50.5754 | 2062    | orf1-par; orf2: RdRp (cd23180); orf3: CP (pfam00729)                                                                                                                                             |
| H-Solemo-LV-25  | MR644-18E/262   | 4184 nt | OR843452 | 11.1379 | 332     | orf1-par; orf2: RdRp (cd23180); orf3: CP (pfam00729)                                                                                                                                             |
| TC-Solemo-LV-1  | MR233-17E/11830 | 5919 nt | OR843453 | 12.8332 | 540     | orf1: Trypsin 2 (pfam13365), Barnaviridae-RdRp (cd23184); orf2; orf3: CP (pfam00729)                                                                                                             |
| TC-Solemo-LV-2  | MR233-17/263    | 5830 nt | OR843454 | 3620.59 | 150862  | orf1-par: Barnaviridae-RdRp (cd23184); orf2: Parvo coat N (pfam08398); orf3: CP (pfam00729)                                                                                                      |
| TC-Solemo-LV-3  | MR233-17E/1105  | 5994 nt | OR843455 | 105.307 | 4464    | orf1-par: Protease? (G834xSGxxxxxxxxxxxxGxH); orf2: RdRp4 (pfam02123, cd23180); orf3: CP (pfam00729)                                                                                             |
| TC-Solemo-LV-4  | MR233-17E/1266  | 5632 nt | OR843456 | 16.6928 | 672     | orf0-par: silencing repressor (pfam04662); orf1: Peptidase S39 (pfam02122); orf2: RdRp4 (pfam02123, cd23180); orf3: CP (pfam00894); orf3a: readthrough protein (pfam01690); orf4: MP (pfam01659) |
| TC-Solemo-LV-5  | MR233-17E/1310  | 5537 nt | OR843457 | 1769.97 | 69788   | orf1-par; orf2: RdRp4 (pfam02123, cd23180); orf3                                                                                                                                                 |
| TC-Solemo-LV-6  | MR233-17E/1312  | 5533 nt | OR843458 | 1323.6  | 52394   | orf1: Trypsin 2 (pfam13365); orf2: RdRp4 (pfam02123, cd23180); orf3                                                                                                                              |
| TC-Solemo-LV-7  | MR233-17E/1313  | 5531 nt | OR843459 | 350.563 | 13852   | orf1: Peptidase S39 (pfam02122); orf2: RdRp4 (pfam02123, cd23180); orf3                                                                                                                          |
| TC-Solemo-LV-8  | MR233-17E/28299 | 1159 nt | OR843460 | 6.50733 | 56      | orf-par: RdRp (cd23167)                                                                                                                                                                          |
| TC-Solemo-LV-9  | MR233-17E/1355  | 5453 nt | OR843461 | 29928.8 | 1165420 | orf1: Trypsin 2 (pfam13365); orf2: RdRp4 (pfam02123, cd23180); orf3                                                                                                                              |
| TC-Solemo-LV-10 | MR233-17E/1413  | 5332 nt | OR843462 | 579.733 | 21948   | orf1: Protease? (G364xSGxxxxxxxxxxxxGxH); orf2: RdRp4 (pfam02123, cd23180); orf3                                                                                                                 |
| TC-Solemo-LV-11 | MR233-17E/1417  | 5318 nt | OR843463 | 25.9199 | 988     | orf1-par: Trypsin 2 (pfam13365); orf2: RdRp4 (pfam02123, cd23180); orf3: Peptidase A6 (pfam01829)                                                                                                |
| TC-Solemo-LV-12 | MR233-17D/27512 | 5545 nt | OR843464 | 54.4023 | 2152    | orf1-par; orf2: RdRp1 (pfam00680, cd23180); orf3: CP (pfam00729)                                                                                                                                 |
| TC-Solemo-LV-13 | MR233-17D/12247 | 5540 nt | OR843465 | 51.0439 | 2020    | orf1-par: Protease? (G542xSGxxxxxxxxxxxxGxH); orf2: RdRp1 (pfam00680, cd23180); orf3: CP (pfam00729)                                                                                             |
| TC-Solemo-LV-14 | MR233-17E/1496  | 5173 nt | OR843466 | 246.722 | 9078    | orf1-par: Protease? (G370xSGxxxxxxxxxxxxGxH); orf2: RdRp4 (pfam02123, cd23180); orf3                                                                                                             |
| TC-Solemo-LV-15 | MR233-17E/1520  | 5125 nt | OR843467 | 17.7982 | 648     | orf1-par: Protease? (G489xSGxxxxxxxxxxxxGxH); orf2-par: RdRp4 (pfam02123, cd23180)                                                                                                               |
| TC-Solemo-LV-16 | MR233-17E/1526  | 5110 nt | OR843468 | 102.269 | 3734    | orf1: Trypsin 2 (pfam13365); orf2: RdRp4 (pfam02123, cd23180); orf3: CP (pfam00729)                                                                                                              |
| TC-Solemo-LV-17 | MR233-17E/1527  | 5109 nt | OR843469 | 17.2312 | 618     | orf1-par; orf2: RdRp4 (pfam02123, cd23180); orf3                                                                                                                                                 |
| TC-Solemo-LV-18 | MR233-17E/1569  | 5061 nt | OR843470 | 89.8295 | 3226    | orf1; orf2: RdRp4 (pfam02123, cd23180); orf3                                                                                                                                                     |
| TC-Solemo-LV-19 | MR233-17E/1581  | 5043 nt | OR843471 | 122.684 | 4434    | orf1-par: Protease? (G518xSGxxxxxxxxxxxxGxH); orf2: RdRp (cd23180); orf3: CP (pfam00729)                                                                                                         |
| TC-Solemo-LV-20 | MR233-17E/1596  | 5021 nt | OR843472 | 23.3989 | 1048    | orf1-par; orf2: RdRp4 (pfam02123, cd23180); orf3: CP (pfam00729)                                                                                                                                 |
| TC-Solemo-LV-21 | MR233-17D/4707  | 5547 nt | OR843473 | 79.9751 | 3156    | orf1-par: Protease? (G587xSGxxxxxxxxxxxxGxH); orf2: RdRp4 (pfam02123, cd23180); orf3                                                                                                             |
| TC-Solemo-LV-22 | MR233-17E/6087  | 2523 nt | OR843474 | 12.9564 | 232     | orf1-par; orf2-par: RdRp3 (pfam00998, cd23179)                                                                                                                                                   |
| TC-Solemo-LV-23 | MR233-17E/6271  | 2485 nt | OR843475 | 15.6036 | 276     | orf1-par: Peptidase S39 (pfam02122); orf2: RdRp4 (pfam02123, cd23180)                                                                                                                            |
| TC-Solemo-LV-24 | MR233-17E/6795  | 2380 nt | OR843476 | 20.1672 | 346     | orf1; orf2: Peptidase S39 (pfam02122); orf3-par: RdRp4 (pfam02123, cd23180)                                                                                                                      |
| TC-Solemo-LV-25 | MR233-17E/2042  | 4427 nt | OR843477 | 41.7836 | 1312    | orf1-par: Trypsin 2 (pfam13365); orf2: RdRp4 (pfam02123, cd23180); orf3: CP (pfam00729)                                                                                                          |
| TC-Solemo-LV-26 | MR233-17E/2335  | 4130 nt | OR843478 | 112.371 | 3310    | orf1; orf2: Peptidase S39 (pfam02122); orf3: RdRp4 (pfam02123, cd23180); orf4: CP (pfam00729)                                                                                                    |
| TC-Solemo-LV-27 | MR233-17E/2404  | 4068 nt | OR843479 | 26.9299 | 778     | orf1: Silencing suppressor; orf2: Peptidase S39 (pfam02122); orf3: RdRp4 (pfam02123, cd23180); orf4: CP (pfam00729)                                                                              |
| TC-Solemo-LV-28 | MR233-17/2579   | 4054 nt | OR843480 | 16.3389 | 474     | orf1: Trypsin 2 (pfam13365); orf2: RdRp4 (pfam02123, cd23180); orf3: CP (pfam00729)                                                                                                              |
| TC-Solemo-LV-29 | MR233-17E/36496 | 1025 nt | OR843481 | 9.51805 | 70      | orf1-par; orf2-par: RdRp4 (pfam02123, cd23180)                                                                                                                                                   |



|                 |                 |         |          |         |       |                                                                                                               |
|-----------------|-----------------|---------|----------|---------|-------|---------------------------------------------------------------------------------------------------------------|
| TC-Solemo-LV-30 | MR233-17E/2702  | 3847 nt | OR843482 | 577.937 | 15720 | orf1-par: Peptidase S39 (pfam02122); orf2: RdRp4 (pfam02123, cd23180); orf3                                   |
| TC-Solemo-LV-31 | MR233-17E/3014  | 4293 nt | OR843483 | 45.1372 | 1382  | orf1; orf2: Trypsin 2 (pfam13365); orf3: RdRp4 (pfam02123, cd23180); orf4: CP (pfam00729)                     |
| TC-Solemo-LV-32 | MR233-17E/3060  | 3622 nt | OR843484 | 13.0555 | 334   | orf1-par; orf2: Barnaviridae-RdRp (cd23184); orf3                                                             |
| TC-Solemo-LV-33 | MR233-17E/3193  | 3552 nt | OR843485 | 11.7424 | 298   | orf1-par; orf2: RdRp4 (pfam02123, cd23180); orf3-par: CP (pfam00729)                                          |
| TC-Solemo-LV-34 | MR233-17E/3271  | 4219 nt | OR843486 | 12.233  | 364   | orf1-par: Trypsin 2 (pfam13365); orf2: RdRp4 (pfam02123, cd23180); orf3                                       |
| TC-Solemo-LV-35 | MR233-17E/8803  | 2076 nt | OR843487 | 10.5048 | 154   | orf1-par: RdRp4 (pfam02123, cd23180); orf2: CP (pfam00729)                                                    |
| TC-Solemo-LV-36 | MR233-17E/3753  | 3279 nt | OR843488 | 24.2897 | 566   | orf1-par; orf2: Barnaviridae-RdRp (cd23184); orf3                                                             |
| TC-Solemo-LV-37 | MR233-17E/5389  | 2699 nt | OR843489 | 11.1423 | 216   | orf1-par: RdRp1 (pfam00680, cd01699); orf2                                                                    |
| TC-Solemo-LV-38 | MR233-17E/5960  | 3753 nt | OR843490 | 28.3893 | 764   | orf1-par; orf2: RdR4 (pfam02123, cd23180)                                                                     |
| TC-Solemo-LV-39 | MR233-17E/5961  | 2553 nt | OR843491 | 24.7932 | 448   | orf-par: RdRp4 (pfam02123, cd23180)                                                                           |
| TC-Solemo-LV-40 | MR233-17D/361   | 1710 nt | OR843492 | 5098.56 | 63036 | orf: RdRp4 (pfam02123, cd23180)                                                                               |
| TC-Solemo-LV-41 | MR233-17E/1715  | 4848 nt | OR843493 | 28.0243 | 962   | orf1-par; orf2: RdRp1 (pfam00680, cd23180); orf3                                                              |
| TC-Solemo-LV-42 | MR233-17E/11509 | 1817 nt | OR843494 | 7.58008 | 98    | orf-par: RdRp4 (pfam02123, cd23180), CP (pfam00729)                                                           |
| TC-Solemo-LV-43 | MR233-17E/6842  | 4014 nt | OR843495 | 213.603 | 6082  | orf1-par: RdRp3 (pfam00998, cd23242); orf2: CP (pfam00729); orf3                                              |
| TC-Solemo-LV-44 | MR233-17E/13244 | 1692 nt | OR843496 | 8.80095 | 104   | orf1-par: Peptidase S39 (pfam02122); orf2-par                                                                 |
| TC-Solemo-LV-45 | MR233-17E/14465 | 1616 nt | OR843497 | 5.64233 | 64    | orf-par: RdRp4 (pfam02123, cd23180), CP (pfam00729)                                                           |
| TC-Solemo-LV-46 | MR233-17E/17111 | 1486 nt | OR843498 | 21.0868 | 224   | orf1-par: CP (pfam00729); orf2                                                                                |
| TC-Solemo-LV-47 | MR233-17E/19393 | 1396 nt | OR843499 | 16.8259 | 170   | orf1-par: RdRp4 (pfam02123, cd23180); orf2-par: CP (pfam00729)                                                |
| TC-Solemo-LV-48 | MR233-17D/2000  | 1359 nt | OR843500 | 250.399 | 2422  | orf1: CP (pfam00729); orf2                                                                                    |
| TC-Solemo-LV-49 | MR233-17E/21734 | 1320 nt | OR843501 | 6.09924 | 56    | orf: CP (pfam00729)                                                                                           |
| TC-Solemo-LV-50 | MR233-17E/22052 | 1310 nt | OR843502 | 17.1023 | 156   | orf1-par: CP (pfam00729); orf2                                                                                |
| TC-Solemo-LV-51 | MR233-17E/23527 | 1270 nt | OR843503 | 3.6189  | 32    | orf1-par: RdRp4 (pfam02123, cd23180); orf2-par                                                                |
| TC-Solemo-LV-52 | MR233-17E/26654 | 1409 nt | OR843504 | 11.1679 | 110   | orf-par: RdRp4 (pfam02123, cd23180)                                                                           |
| TC-Solemo-LV-53 | MR233-17E/28631 | 1152 nt | OR843505 | 7.08767 | 56    | orf-par: RdRp4 (pfam02123, cd23180)                                                                           |
| TC-Solemo-LV-54 | MR233-17E/29307 | 1138 nt | OR843506 | 10.8884 | 86    | orf-par: RdRp (cd23180)                                                                                       |
| TC-Solemo-LV-55 | MR233-17E/29415 | 2350 nt | OR843507 | 5.63861 | 96    | orf1-par: RdRp3 (pfam00998, cd23206); orf2: CP (pfam00729)                                                    |
| TC-Solemo-LV-56 | MR233-17E/29640 | 1132 nt | OR843508 | 8.61296 | 70    | orf: CP (pfam00729)                                                                                           |
| TC-Solemo-LV-57 | MR233-17E/1122  | 1122 nt | OR843509 | 18.4376 | 148   | orf: CP (pfam00729)                                                                                           |
| TC-Solemo-LV-58 | MR233-17E/30591 | 1115 nt | OR843510 | 12.9803 | 100   | orf-par: Barnaviridae RdRp (cd23184)                                                                          |
| TC-Solemo-LV-59 | MR233-17E/33157 | 1073 nt | OR843511 | 8.21994 | 62    | orf-par: RdRp4 (pfam02123, cd23180)                                                                           |
| TC-Solemo-LV-60 | MR233-17E/34672 | 1050 nt | OR843512 | 7.34    | 54    | orf-par: RdRp4 (pfam02123, cd23180)                                                                           |
| TC-Solemo-LV-61 | MR233-17E/1352  | 5454 nt | OR843513 | 14.8604 | 574   | orf1: Barnaviridae RdRp (cd23184); orf2; orf3                                                                 |
| TC-Solemo-LV-62 | MR233-17E/2602  | 5566 nt | OR843514 | 16.1985 | 632   | orf1: Barnaviridae RdRp (cd23184); orf2; orf3                                                                 |
| TC-Solemo-LV-63 | MR233-17E/19827 | 1380 nt | OR843515 | 6.64058 | 68    | orf: Barnaviridae RdRp (cd23184)                                                                              |
| H-Tombus-LV-1   | MR644-18E/776   | 3628 nt | OR843516 | 231.065 | 6110  | suppression of UAG and UAA codons, orf1-par; orf2: RdRp3 (pfam00998, cd23206); orf3: CP (pfam00729); orf4-par |
| H-Tombus-LV-2   | MR644-18E/176   | 5005 nt | OR843517 | 26.3447 | 956   | orf1: VMethylTr (pfam01660), RdRp3 (pfam00998, cd01699); orf2: CP (pfam00729)                                 |
| H-Tombus-LV-3   | MR644-18E/190   | 4848 nt | OR843518 | 79.4837 | 2762  | orf1; orf2: RdRp3 (pfam00998, cd23179); orf3; orf4                                                            |
| H-Tombus-LV-4   | MR644-18E/210   | 4611 nt | OR843519 | 504.292 | 17142 | orf1; orf2: RdRp3 (pfam00998, cd23179); orf3                                                                  |
| H-Tombus-LV-5   | MR644-18E/214   | 4542 nt | OR843520 | 17.6449 | 576   | orf1; orf2: ReRp3 (pfam00998, cd23179); orf3: CP (pfam00729)                                                  |
| H-Tombus-LV-6   | MR644-18E/225   | 4455 nt | OR843521 | 118.905 | 3996  | orf1: P33 (pfam08500); orf2: RdRp3 (pfam00998, cd23242); orf3: PLA2 (cd04706), CP (pfam00729)                 |
| H-Tombus-LV-7   | MR644-18E/228   | 4431 nt | OR843522 | 23.2009 | 738   | orf1; orf2: RdRp3 (pfam00998, cd23242); orf3: CP (pfam00729)                                                  |
| H-Tombus-LV-8   | MR644-18E/233   | 4389 nt | OR843523 | 816.977 | 26116 | orf1; orf2: RdRp3 (pfam00998, cd23242); orf3: CP (pfam00729)                                                  |
| H-Tombus-LV-9   | MR644-18E/235   | 4381 nt | OR843524 | 30.3093 | 962   | orf1; orf2: RdRp3 (pfam00998, cd23179); orf3: CP (pfam00729)                                                  |
| H-Tombus-LV-10  | MR644-18E/242   | 4319 nt | OR843525 | 58.2079 | 1816  | orf1; orf2: RdRp3 (pfam00998, cd23179); orf3                                                                  |
| H-Tombus-LV-11  | MR644-18E/245   | 4283 nt | OR843526 | 140.799 | 4342  | orf1-par: P33 (pfam08500); orf2: RdRp3 (pfam00998, cd23242); orf3: CP (pfam00729)                             |
| H-Tombus-LV-12  | MR644-18E/248   | 4253 nt | OR843527 | 23.6906 | 728   | orf1; orf2: RdRp3 (pfam00998, cd23239); orf3: CP (pfam00729)                                                  |
| H-Tombus-LV-13  | MR644-18E/251   | 4244 nt | OR843528 | 38.504  | 1186  | orf1; orf2: RdRp3 (pfam00998, cd23242); orf3: CP (pfam00729)                                                  |
| H-Tombus-LV-14  | MR644-18E/259   | 4208 nt | OR843529 | 40.222  | 1256  | orf1-par: P33 (pfam08500); orf2: RdRp3 (pfam00998, cd23242); orf3: PLA2 (cd04706), CP (pfam00729)             |
| H-Tombus-LV-15  | MR644-18E/265   | 4162 nt | OR843530 | 38.8787 | 1244  | orf1-par; orf2: RdRp3 (pfam00998, cd23242); orf3: CP (pfam00729)                                              |
| H-Tombus-LV-16  | MR644-18E/266   | 4158 nt | OR843531 | 157.897 | 4774  | orf1-par: Panicovirus-RdRp (cd23238); orf2: RdRp3 (pfam00998, cd23242); orf3: CP (pfam00729)                  |
| H-Tombus-LV-17  | MR644-18E/275   | 4081 nt | OR843532 | 36.5812 | 1102  | orf1-par: P33 (pfam08500); orf2: RdRp3 (pfam00998, cd23242); orf3: PLA2 (cd04706), CP (pfam00729)             |

|                |                 |         |          |         |       |                                                                                                                                                             |
|----------------|-----------------|---------|----------|---------|-------|-------------------------------------------------------------------------------------------------------------------------------------------------------------|
| H-Tombus-LV-18 | MR644-18E/284   | 4008 nt | OR843533 | 23.7625 | 694   | orf1: P33 (pfam08500, cd23238); orf2: RdRp3 (pfam00998, cd23206); orf3: CP (pfam00729)                                                                      |
| H-Tombus-LV-19 | MR644-18E/285   | 4006 nt | OR843534 | 52.4201 | 1524  | orf1-par; orf2: RdRp3 (pfam00998, cd23241); orf3: CP (pfam00729)                                                                                            |
| H-Tombus-LV-20 | MR644-18E/286   | 3997 nt | OR843535 | 16.9039 | 488   | orf1-par; orf2: RdRp3 (pfam00998, cd23179); orf3: CP (pfam00729)                                                                                            |
| H-Tombus-LV-21 | MR644-18E/296   | 3948 nt | OR843536 | 27.0385 | 774   | orf1-par; orf2: RdRp3 (pfam00998, cd23179); orf3: CP (pfam00729)                                                                                            |
| H-Tombus-LV-22 | MR644-18E/300   | 3925 nt | OR843537 | 32.9386 | 938   | orf1: Panicovirus-RdRp (cd23238); orf2: RdRp3 (pfam00998, cd23242); orf3: MP (pfam05318); orf4: CP (pfam00729)                                              |
| H-Tombus-LV-23 | MR644-18E/303   | 3909 nt | OR843538 | 33.3904 | 950   | orf1-par, orf2: RdRp3 (pfam00998, cd23239); orf3                                                                                                            |
| H-Tombus-LV-24 | MR644-18E/323   | 3768 nt | OR843539 | 26.4639 | 752   | orf1-par, orf2: RdRp3 (pfam00998, cd23242); orf3: CP (pfam00729)                                                                                            |
| H-Tombus-LV-25 | MR644-18E/328   | 3739 nt | OR843540 | 3401.89 | 92598 | orf1, orf2: RdRp3 (pfam00998, cd23242); orf3: CP (pfam00729)                                                                                                |
| H-Tombus-LV-26 | MR644-18E/331   | 3735 nt | OR843541 | 41.2817 | 1120  | suppression of UAG and UAA codons; orf1-par, orf2: RdRp3 (pfam00998, cd23206); orf3: CP (pfam00729)                                                         |
| H-Tombus-LV-27 | MR644-18E/338   | 3720 nt | OR843542 | 411.815 | 11160 | orf1-par: P33 (pfam08500); orf2: RdRp3 (pfam00998, cd23244); orf3; orf4; orf5                                                                               |
| H-Tombus-LV-28 | MR644-18E/342   | 3703 nt | OR843543 | 15.3408 | 418   | orf1, orf2: RdRp3 (pfam00998, cd23242); orf3                                                                                                                |
| H-Tombus-LV-29 | MR644-18E/351   | 4097 nt | OR843544 | 33.575  | 966   | orf1-par: P33 (pfam08500); orf2: RdRp3 (pfam00998, cd23206); orf3: CP (pfam00729)                                                                           |
| H-Tombus-LV-30 | MR644-18E/357   | 3604 nt | OR843545 | 21.5591 | 564   | suppression of UAG and UAA codons, orf1; orf2: RdRp3 (pfam00998, cd23206); orf3: CP (pfam00729)                                                             |
| H-Tombus-LV-31 | MR644-18E/362   | 5490 nt | OR843546 | 22.5811 | 898   | orf1, orf2: RdRp3 (pfam00998, cd23242); orf3: CP (pfam00729)                                                                                                |
| H-Tombus-LV-32 | MR644-18E/394   | 3459 nt | OR843547 | 25.2732 | 670   | orf1: RdRp3 (pfam00998, cd23206); orf2: CP (pfam00729)                                                                                                      |
| H-Tombus-LV-33 | MR644-18E/429   | 4703 nt | OR843548 | 38.2492 | 1312  | orf1: P33 (pfam08500); orf2: RdRp3 (pfam00998, cd23236); orf3: CP (pfam00729); orf4: P22/MP (pfam03558); orf5: P19/silencing suppressor protein (pfam03220) |
| H-Tombus-LV-34 | MR644-18D/3709  | 3202 nt | OR843549 | 78.6324 | 1816  | orf1-par; orf2: RdRp3 (pfam00998, cd23206); orf3                                                                                                            |
| H-Tombus-LV-35 | MR644-18E/506   | 4506 nt | OR843550 | 10.5202 | 344   | orf1; orf2: RdRp (pfam00998, cd23179); orf3; orf4                                                                                                           |
| H-Tombus-LV-36 | MR644-18E/522   | 3570 nt | OR843551 | 20.1157 | 522   | orf1-par; orf2: RdRp3 (pfam00998, cd23179); orf3; orf4                                                                                                      |
| H-Tombus-LV-37 | MR644-18E/542   | 2825 nt | OR843552 | 7.32035 | 152   | orf1-par; orf2: RdRp (pfam00998, cd23179)                                                                                                                   |
| H-Tombus-LV-38 | MR644-18E/586   | 2739 nt | OR843553 | 34.0661 | 682   | orf1-par: RdRp (pfam00998, cd23242); orf2: PLA2 (cd04706), CP (pfam00729)                                                                                   |
| H-Tombus-LV-39 | MR644-18E/593   | 2724 nt | OR843554 | 14.489  | 290   | orf1-par; orf2: RdRp3 (pfam00998, cd23206); orf3-par                                                                                                        |
| H-Tombus-LV-40 | MR644-18E/642   | 2611 nt | OR843555 | 8.40061 | 156   | orf1: p33 (pfam08500); orf2-par: RdRp (pfam00998, cd23242)                                                                                                  |
| H-Tombus-LV-41 | MR644-18E/710   | 2482 nt | OR843556 | 13.9363 | 254   | orf1: RdRp (pfam00998, cd23206); orf2                                                                                                                       |
| H-Tombus-LV-42 | MR644-18E/715   | 3537 nt | OR843557 | 3.78513 | 98    | orf1-par; orf2: RdRp (pfam00998, cd23242); orf3                                                                                                             |
| H-Tombus-LV-43 | MR644-18E/864   | 2255 nt | OR843558 | 7.21818 | 116   | orf1-par; orf2-par: RdRp3 (pfam00998, cd23206)                                                                                                              |
| H-Tombus-LV-44 | MR644-18E/1014  | 2092 nt | OR843559 | 13.1826 | 198   | orf1-par; orf2: RdRp3 (pfam00998, cd23242)                                                                                                                  |
| H-Tombus-LV-45 | MR644-18E/1044  | 2068 nt | OR843560 | 13.6654 | 204   | orf1-par: RdRp3 (pfam00998, cd23206); orf2-par: Peptidase M3 (pfam01432)                                                                                    |
| H-Tombus-LV-46 | MR644-18E/1090  | 2026 nt | OR843561 | 8.58144 | 128   | orf1-par: Panicovirus-RdRp (pfam23238); orf2-par: RdRp3 (pfam00998, cd23206)                                                                                |
| H-Tombus-LV-47 | MR644-18D/24915 | 2058 nt | OR843562 | 16.2799 | 244   | orf: RdRp3 (pfam00998, cd23242)                                                                                                                             |
| H-Tombus-LV-48 | MR644-18E/1202  | 1939 nt | OR843563 | 8.9608  | 130   | orf1-par: RdRp3 (pfam00998, cd23242); orf2                                                                                                                  |
| H-Tombus-LV-49 | MR644-18E/1381  | 1804 nt | OR843564 | 12.1818 | 156   | orf: RdRp3 (pfam00998, cd23241)                                                                                                                             |
| H-Tombus-LV-50 | MR644-18E/1473  | 1756 nt | OR843565 | 6.9049  | 86    | orf-par: RdRp3 (pfam00998, cd23179)                                                                                                                         |
| H-Tombus-LV-51 | MR644-18E/1683  | 1644 nt | OR843566 | 7.90937 | 96    | orf-par: RdRp3 (pfam00998, cd23242)                                                                                                                         |
| H-Tombus-LV-52 | MR644-18E/1816  | 1590 nt | OR843567 | 5.12075 | 60    | orf1-par: P33 (pfam08500); orf2-par: RdRp3 (pfam00998, cd23206)                                                                                             |
| H-Tombus-LV-53 | MR644-18E/2394  | 1605 nt | OR843568 | 7.16885 | 84    | orf1-par: RdRp3 (pfam00998, cd23206); orf2-par                                                                                                              |
| H-Tombus-LV-54 | MR644-18E/2840  | 1330 nt | OR843569 | 20.5624 | 200   | orf-par: CP (pfam00729)                                                                                                                                     |
| H-Tombus-LV-55 | MR644-18E/3317  | 1388 nt | OR843570 | 10.3876 | 110   | orf-par: RdRp3 (pfam00998, cd23206)                                                                                                                         |
| H-Tombus-LV-56 | MR644-18E/4252  | 1142 nt | OR843571 | 10.0009 | 82    | orf-par                                                                                                                                                     |
| H-Tombus-LV-57 | MR644-18D/19461 | 4480 nt | OR843572 | 25.7656 | 864   | orf1; orf2: RdRp3 (pfam00998, cd23241)                                                                                                                      |
| H-Tombus-LV-58 | MR644-18E/359   | 3589 nt | OR843573 | 33.0666 | 868   | suppression of UAG and UAA codons, orf1-par; orf2: RdRp3 (pfam00998, cd23206); orf3: CP (pfam00729);                                                        |
| H-Tombus-LV-59 | MR644-18E/363   | 3567 nt | OR843574 | 104.635 | 2706  | orf1-par: P33 (pfam08500); orf2: RdRp3 (pfam00998, cd23243); orf3: CP (pfam00729); orf4; orf5                                                               |
| H-Tombus-LV-60 | MR644-18E/421   | 3321 nt | OR843575 | 15.9807 | 384   | orf1; orf2: RdRp3 (pfam00998, cd23179)                                                                                                                      |
| H-Tombus-LV-61 | MR644-18E/491   | 2960 nt | OR843576 | 29.4956 | 634   | orf-par: VMethylTr (pfam01660), RdRp3 (pfam00998, cd23179)                                                                                                  |
| H-Tombus-LV-62 | MR644-18E/527   | 2872 nt | OR843577 | 102.256 | 2154  | orf1; orf2: RdRp (cd23179)                                                                                                                                  |
| H-Tombus-LV-63 | MR644-18E/532   | 2860 nt | OR843578 | 20.1888 | 420   | orf1-par; orf2-par: RdRp3 (pfam00998, cd01699)                                                                                                              |
| H-Tombus-LV-64 | MR644-18E/555   | 2797 nt | OR843579 | 11.1963 | 232   | orf1-par: RdRp3 (pfam00998, cd23179); orf2                                                                                                                  |
| H-Tombus-LV-65 | MR644-18E/564   | 2784 nt | OR843580 | 10.0295 | 200   | orf1; orf2-par: RdRp3 (pfam00998, cd23179)                                                                                                                  |
| H-Tombus-LV-66 | MR644-18E/978   | 2128 nt | OR843581 | 10.0498 | 152   | orf-par: RdRp3 (pfam00998, cd23179)                                                                                                                         |

|                 |                 |         |          |         |       |                                                                                                               |
|-----------------|-----------------|---------|----------|---------|-------|---------------------------------------------------------------------------------------------------------------|
| H-Tombus-LV-67  | MR644-18E/1331  | 2396 nt | OR843582 | 14.2684 | 248   | orf1-par: RdRp3 (pfam00998, cd23179); orf2: CP (pfam00729)                                                    |
| H-Tombus-LV-68  | MR644-18E/1477  | 1753 nt | OR843583 | 24.7296 | 322   | orf1-par: Panicovirus-RdRp (cd23238); orf2-par: RdRp3 (pfam00998, cd23206)                                    |
| H-Tombus-LV-69  | MR644-18E/1675  | 1646 nt | OR843584 | 11.9034 | 140   | orf: RdRp3 (pfam00998, cd23242)                                                                               |
| H-Tombus-LV-70  | MR644-18E/1703  | 1637 nt | OR843585 | 10.1179 | 124   | orf1-par: RdRp3 (pfam00998, cd23239); orf2-par: CP (pfam00719)                                                |
| H-Tombus-LV-71  | MR644-18D/13390 | 1662 nt | OR843586 | 12.6679 | 156   | orf: RdRp3 (pfam00998, cd23242)                                                                               |
| H-Tombus-LV-72  | MR644-18E/2085  | 1506 nt | OR843587 | 10.9934 | 122   | orf-par: RdRp2 (pfam00978, cd01699)                                                                           |
| H-Tombus-LV-73  | MR644-18E/2179  | 1480 nt | OR843588 | 6.55135 | 70    | orf-par: RdRp3 (pfam00998, cd23206)                                                                           |
| H-Tombus-LV-74  | MR644-18E/2210  | 1472 nt | OR843589 | 4.68886 | 52    | orf1-par: RdRp3 (pfam00998, cd23206); orf2-par                                                                |
| H-Tombus-LV-75  | MR644-18E/2225  | 1467 nt | OR843590 | 7.00341 | 76    | orf-par: RdRp3 (pfam00998, cd23179)                                                                           |
| H-Tombus-LV-76  | MR644-18E/20890 | 1385 nt | OR843591 | 9.33405 | 92    | orf-par: CP (pfam00729)                                                                                       |
| H-Tombus-LV-77  | MR644-18E/2950  | 2664 nt | OR843592 | 12.914  | 258   | orf1; orf2: RdRp3 (pfa,00998, cd23242)                                                                        |
| H-Tombus-LV-78  | MR644-18E/3051  | 1800 nt | OR843593 | 5.98278 | 78    | orf1; orf2: RdRp3 (pfam00998, cd23179); orf3-par                                                              |
| H-Tombus-LV-79  | MR644-18E/3199  | 1269 nt | OR843594 | 10.4027 | 92    | orf1-par: RdRp3 (pfam00998, cd23179); orf2-par                                                                |
| H-Tombus-LV-80  | MR644-18E/3256  | 1261 nt | OR843595 | 4.85408 | 44    | orf1: RdRp (pfam00998, cd23238); orf2-par: PLA 2 (cd04706), CP (pfam00729)                                    |
| H-Tombus-LV-81  | MR644-18E/3474  | 1229 nt | OR843596 | 5.53377 | 48    | orf1-par: RdRp3 (pfam00998, cd23242); orf2-par                                                                |
| H-Tombus-LV-82  | MR644-18E/3654  | 1205 nt | OR843597 | 14.1867 | 124   | orf1-par: P33 (pfam08500); orf2-par: RdRp3 (pfam00998, cd23242)                                               |
| H-Tombus-LV-83  | MR644-18D/54690 | 1439 nt | OR843598 | 5.9319  | 62    | orf-par: RdRp3 (pfam00998, cd23179)                                                                           |
| H-Tombus-LV-84  | MR644-18E/3932  | 1174 nt | OR843599 | 36.2116 | 316   | orf-par: CP (pfam00729)                                                                                       |
| H-Tombus-LV-85  | MR644-18E/4150  | 1152 nt | OR843600 | 4.23351 | 36    | orf1-par: CP (pfam00729); orf2-par: silencing suppressor protein (pfam19239)                                  |
| H-Tombus-LV-86  | MR644-18E/4228  | 1144 nt | OR843601 | 6.27972 | 50    | orf1-par; orf2-par: RdRp3 (pfam00998, cd23242)                                                                |
| H-Tombus-LV-87  | MR644-18E/4715  | 1096 nt | OR843602 | 11.7318 | 96    | orf-par: CP (pfam00729)                                                                                       |
| H-Tombus-LV-88  | MR644-18E/4859  | 1083 nt | OR843603 | 19.0905 | 92    | suppression of UAG and UAA codons; orf-par: CP (pfam00729)                                                    |
| H-Tombus-LV-89  | MR644-18E/1585  | 3291 nt | OR843604 | 9.0869  | 148   | orf1-par; orf2-par: RdRp3 (pfam00998, cd23206)                                                                |
| H-Tombus-LV-90  | MR644-18E/5288  | 1048 nt | OR843605 | 19.9485 | 222   | orf-par: CP (pfam00729)                                                                                       |
| H-Tombus-LV-91  | MR644-18E/5410  | 1039 nt | OR843606 | 9.08566 | 154   | orf-par                                                                                                       |
| H-Tombus-LV-92  | MR644-18E/5898  | 1002 nt | OR843607 | 3.76946 | 66    | orf1-par: RdRp3 (pfam00998, cd23242); orf2-par                                                                |
| H-Tombus-LV-93  | MR644-18D/78707 | 873 nt  | OR843608 | 8.49255 | 28    | orf-par: RdRp3 (pfam00998, cd23243)                                                                           |
| H-Tombus-LV-94  | MR644-18E/373   | 3538 nt | OR843609 | 17.7337 | 52    | suppression of UAG and UAA codons; orf1-par; orf2: RdRp3 (pfam00998, cd23206); orf3: CP (pfam00729)           |
| H-Tombus-LV-95  | MR644-18E/384   | 3490 nt | OR843610 | 32.1544 | 452   | suppression of UAG and UAA codons; orf1; orf2: RdRp3 (pfam00998, cd23206); orf3: CP (pfam00729)               |
| H-Tombus-LV-96  | MR644-18E/389   | 3482 nt | OR843611 | 35.2823 | 812   | suppression of UAG and UAA codons; orf1-par; orf2: RdRp3 (pfam00998, cd23206); orf3: CP (pfam00729)           |
| H-Tombus-LV-97  | MR644-18E/571   | 2769 nt | OR843612 | 18.1585 | 894   | suppression of UAG and UAA codons; orf1-par; orf2: RdRp3 (pfam00998, cd23206); orf3-par: CP (pfam00729)       |
| H-Tombus-LV-98  | MR644-18D/18329 | 2602 nt | OR843613 | 16.0415 | 364   | suppression of UAG and UAA codons; orf1-par: RdRp3 (pfam00998, cd23206); orf2: CP (pfam00729)                 |
| H-Tombus-LV-99  | MR644-18E/22849 | 562 nt  | OR843614 | 5.37011 | 296   | orf-par: RdRp3 (pfam00998, cd23206)                                                                           |
| H-Tombus-LV-100 | MR644-18E/805   | 2346 nt | OR843615 | 12.3457 | 22    | orf1-par; orf2: RdRp (cd23179)                                                                                |
| H-Tombus-LV-101 | MR644-18E/1214  | 2199 nt | OR843616 | 8.51387 | 214   | orf1-par; orf2-par: RdRp (cd23179)                                                                            |
| H-Tombus-LV-102 | MR644-18E/1545  | 1706 nt | OR843617 | 10.2884 | 136   | orf1-par; orf2-par: CP (pfam00729)                                                                            |
| H-Tombus-LV-103 | MR644-18E/2001  | 1529 nt | OR843618 | 31.6344 | 128   | orf: CP (pfam00729)                                                                                           |
| H-Tombus-LV-104 | MR644-18E/3839  | 1184 nt | OR843619 | 6.95524 | 62    | orf1-par; orf2: RdRp3 (pfam00998, cd23244)                                                                    |
| H-Tombus-LV-105 | MR644-18E/5912  | 1001 nt | OR843620 | 4.99201 | 36    | orf-par: CP (pfam00729)                                                                                       |
| TC-Tombus-LV-1  | MR233-17E/8915  | 2760 nt | OR843621 | 38.9449 | 770   | orf1; orf2: RdRp3 (pfam00998, cd23240); orf3                                                                  |
| TC-Tombus-LV-2  | MR233-17E/8986  | 2056 nt | OR843622 | 17.3234 | 250   | orf1: RdRp3 (pfam00998, cd23179); orf2-par                                                                    |
| TC-Tombus-LV-3  | MR233-17D/20250 | 2236 nt | OR843623 | 34.4615 | 548   | orf1-par: RdRp3 (pfam00998, cd23242); orf2: CP (pfam00729)                                                    |
| TC-Tombus-LV-4  | MR233-17E/9475  | 2017 nt | OR843624 | 14.76   | 210   | orf1-par: RdRp (cd23179); orf2: CP (pfam00729)                                                                |
| TC-Tombus-LV-5  | MR233-17E/9475  | 2002 nt | OR843625 | 67.0772 | 1016  | orf; orf1; orf2-par: RdRp3 (pfam00998, cd23242)                                                               |
| TC-Tombus-LV-6  | MR233-17D/10091 | 3455 nt | OR843626 | 66.2955 | 1644  | suppression of UAG and UAA codons; orf1-par; orf2: RdRp3 (pfam00998, cd23206); orf3: CP (pfam00729); orf4-par |
| TC-Tombus-LV-7  | MR233-17E/3079  | 3613 nt | OR843627 | 12.873  | 336   | orf1: VMethylTr (pfam01660), RdRp2 (pfam00978, cd23179); orf2-par: CP (pfam00729)                             |
| TC-Tombus-LV-8  | MR233-17E/807   | 6910 nt | OR843628 | 725.653 | 35746 | orf1: RdRp1 (pfam00680, cd01699); orf2: CP (pfam00729)                                                        |
| TC-Tombus-LV-9  | MR233-17E/1240  | 5678 nt | OR843629 | 26.0859 | 1058  | orf1; orf2: RdRp (cd23179); orf3: Peptidase A21 (pfam03566)                                                   |
| TC-Tombus-LV-10 | MR233-17E/1713  | 4851 nt | OR843630 | 1955.97 | 67772 | orf1; orf2: RdRp3 (pfam00998, cd23179); orf3; orf4                                                            |
| TC-Tombus-LV-11 | MR233-17E/1726  | 4832 nt | OR843631 | 91.1163 | 3144  | orf1; orf2: RdRp3 (pfam00998, cd23179); orf3; orf4                                                            |
| TC-Tombus-LV-12 | MR233-17E/1729  | 4829 nt | OR843632 | 1425.57 | 49166 | orf1; orf2: RdRp3 (pfam00998, cd23179); orf3                                                                  |

|                 |                |         |          |         |        |                                                                                               |
|-----------------|----------------|---------|----------|---------|--------|-----------------------------------------------------------------------------------------------|
| TC-Tombus-LV-13 | MR233-17E/1593 | 5024 nt | OR843633 | 35.3607 | 1266   | orf1: VMethylTr (pfam01660), RdRp3 (pfam0998, cd23179); orf2: orf3: CP (pfam00729)            |
| TC-Tombus-LV-14 | MR233-17E/1701 | 4868 nt | OR843634 | 155.143 | 5352   | orf1: RdRp3 (pfam0998, cd23179)                                                               |
| TC-Tombus-LV-15 | MR233-17E/1765 | 4776 nt | OR843635 | 45.3185 | 1550   | orf1-par; orf2: CBPV-like RdRp (cd23174)                                                      |
| TC-Tombus-LV-16 | MR233-17E/1861 | 4644 nt | OR843636 | 72.2752 | 2390   | orf1: VMethylTr (pfam01660), RdRp3 (pfam0998, cd23179); orf2: CP (pfam00729)                  |
| TC-Tombus-LV-17 | MR233-17E/1924 | 4575 nt | OR843637 | 52.6424 | 1720   | orf1; orf2: RdRp3 (pfam0998, cd23206); orf3: CP (pfam00729)                                   |
| TC-Tombus-LV-18 | MR233-17D/3535 | 4988 nt | OR843638 | 183.23  | 6558   | orf1; orf2: RdRp3 (pfam0998, cd23179); orf3: CP (pfam00729)                                   |
| TC-Tombus-LV-19 | MR233-17E/1949 | 4537 nt | OR843639 | 82.8475 | 2688   | orf-par: RdRp1 (pfam00680, cd01699)                                                           |
| TC-Tombus-LV-20 | MR233-17E/1954 | 4533 nt | OR843640 | 80.3722 | 2602   | orf1; orf2: RdRp3 (pfam0998, cd23206); orf3: CP (pfam00729)                                   |
| TC-Tombus-LV-21 | MR233-17E/1970 | 4516 nt | OR843641 | 15.0983 | 490    | orf1; orf2: RdRp3 (pfam0998, cd23179), orf3                                                   |
| TC-Tombus-LV-22 | MR233-17E/4509 | 4509 nt | OR843642 | 44.0189 |        | orf1: VMethylTr (pfam01660), RdRp3 (pfam0998, cd23179), orf2: PLA2 (cd04706), CP (pfam00729)  |
| TC-Tombus-LV-23 | MR233-17E/2010 | 4456 nt | OR843643 | 118.136 | 3754   | orf1; orf2: RdRp3 (pfam0998, cd23206); orf3: CP (pfam00729)                                   |
| TC-Tombus-LV-24 | MR233-17E/2024 | 4441 nt | OR843644 | 43.7976 | 1396   | orf1: P33 (pfam08500); orf2: RdRp3 (pfam0998, cd23242); orf3: PLA2 (cd04706), CP (pfam00729)  |
| TC-Tombus-LV-25 | MR233-17E/2038 | 4429 nt | OR843645 | 20.9621 | 654    | orf1-par; orf2: RdRp3 (pfam0998, cd23179); orf3-par                                           |
| TC-Tombus-LV-26 | MR233-17E/2056 | 4412 nt | OR843646 | 2585.88 | 80818  | orf1; orf2: RdRp3 (pfam0998, cd23206); orf3: CP (pfam00729)                                   |
| TC-Tombus-LV-27 | MR233-17E/2060 | 4410 nt | OR843647 | 27.1474 | 866    | orf1; orf2: RdRp3 (pfam0998, cd23179); orf3: CP (pfam00729)                                   |
| TC-Tombus-LV-28 | MR233-17E/2061 | 4408 nt | OR843648 | 17.801  | 560    | orf1: VMethylTr (pfam01660), RdRp3 (pfam0998, cd23179); orf2                                  |
| TC-Tombus-LV-29 | MR233-17E/2073 | 4400 nt | OR843649 | 33.417  | 1050   | orf1; orf2: RdRp3 (pfam0998, cd23241); orf3: PLA2 (cd04706), CP (pfam00729)                   |
| TC-Tombus-LV-30 | MR233-17E/2084 | 4385 nt | OR843650 | 51.8951 | 1622   | suppression of UAG and UAA codons; orf1-par: RdRp3 (pfam0998, cd23179); orf2: CP (pfam00729)  |
| TC-Tombus-LV-31 | MR233-17E/2120 | 4342 nt | OR843651 | 24.0661 | 740    | orf1; orf2: RdRp3 (pfam0998, cd23239); orf3: CP (pfam00729)                                   |
| TC-Tombus-LV-32 | MR233-17E/2125 | 4338 nt | OR843652 | 19.503  | 612    | orf1: P33 (pfam08500); orf2: RdRp3 (pfam0998, cd23238); orf3: PLA2 (cd04706), CP (pfam00729)  |
| TC-Tombus-LV-33 | MR233-17E/2133 | 4328 nt | OR843653 | 96.7442 | 2986   | orf1; orf2: RdRp3 (pfam0998, cd23242); orf3: CP (pfam00729)                                   |
| TC-Tombus-LV-34 | MR233-17E/2145 | 4315 nt | OR843654 | 237.387 | 7294   | orf1: P33 (pfam08500); orf2: RdRp3 (pfam0998, cd23243); orf3: CP (pfam00729); orf4            |
| TC-Tombus-LV-35 | MR233-17E/9436 | 2007 nt | OR843655 | 19.0169 | 274    | orf1: Panicovirus-RdRp (cd23238); orf2: RdRp3 (pfam0998, cd23206)                             |
| TC-Tombus-LV-36 | MR233-17E/2164 | 4300 nt | OR843656 | 33.8837 | 1032   | orf1-par; orf2: RdRp3 (pfam0998, cd23179); orf3                                               |
| TC-Tombus-LV-37 | MR233-17E/2184 | 4280 nt | OR843657 | 13.8769 | 422    | orf1; orf2: RdRp3 (pfam0998, cd23242); orf3: CP (pfam00729)                                   |
| TC-Tombus-LV-38 | MR233-17E/2195 | 4268 nt | OR843658 | 140.045 | 4248   | orf1; orf2: RdRp3 (pfam0998, cd23179); orf3                                                   |
| TC-Tombus-LV-39 | MR233-17E/2218 | 4247 nt | OR843659 | 179.283 | 5442   | orf1: Panicovirus-RdRp (cd23238); orf2: RdRp3 (pfam0998, cd23242); orf3: CP (pfam00729)       |
| TC-Tombus-LV-40 | MR233-17E/2236 | 4227 nt | OR843660 | 991.116 | 30124  | orf1; orf2: RdRp3 (pfam0998, cd23242); orf3: CP (pfam00729)                                   |
| TC-Tombus-LV-41 | MR233-17E/2238 | 4224 nt | OR843661 | 121.123 | 3660   | orf1; orf2: RdRp3 (pfam0998, cd23206); orf3: CP (pfam00729)                                   |
| TC-Tombus-LV-42 | MR233-17E/2241 | 4220 nt | OR843662 | 42.1308 | 1276   | orf1: Panicovirus-RdRp (cd23238); orf2: RdRp3 (pfam0998, cd23242); orf3: CP (pfam00729)       |
| TC-Tombus-LV-43 | MR233-17E/2257 | 4201 nt | OR843663 | 200.493 | 6054   | orf1; orf2                                                                                    |
| TC-Tombus-LV-44 | MR233-17E/2275 | 4182 nt | OR843664 | 16.1478 | 490    | suppression of UAG and UAA codons; orf1-par: RdRp2 (pfam00978, cd01699); orf2: CP (pfam00729) |
| TC-Tombus-LV-45 | MR233-17E/2279 | 4178 nt | OR843665 | 353.539 | 10440  | orf1-par; orf2: RdRp3 (pfam0998, cd23206); orf3: CP (pfam00729)                               |
| TC-Tombus-LV-46 | MR233-17E/2286 | 4176 nt | OR843666 | 18.2426 | 544    | orf1-par: RdRp3 (pfam0998, cd01699); orf2-par: CP (pfam00729)                                 |
| TC-Tombus-LV-47 | MR233-17E/2291 | 4172 nt | OR843667 | 13.9456 | 416    | orf1: P33 (pfam08500); orf2: RdRp3 (pfam0998, cd23242); orf3: CP (pfam00729)                  |
| TC-Tombus-LV-48 | MR233-17E/2293 | 4171 nt | OR843668 | 66.3045 | 1954   | orf1; orf2: RdRp3 (pfam0998, cd23179); orf3: CP (pfam00729)                                   |
| TC-Tombus-LV-49 | MR233-17E/2299 | 4164 nt | OR843669 | 34.4625 | 1016   | orf1; orf2: RdRp3 (pfam0998, cd23242); orf3: CP (pfam00729)                                   |
| TC-Tombus-LV-50 | MR233-17E/2300 | 4163 nt | OR843670 | 212.074 | 6284   | orf1-par: P33 (pfam08500); orf2: RdRp3 (pfam0998, cd23242); orf3: CP (pfam00729); orf4        |
| TC-Tombus-LV-51 | MR233-17E/2318 | 4145 nt | OR843671 | 147.754 | 4360   | orf1; orf2: RdRp3 (pfam0998, cd23179); orf3: CP (pfam00729)                                   |
| TC-Tombus-LV-52 | MR233-17E/2326 | 4139 nt | OR843672 | 142.963 | 4240   | orf1; orf2: RdRp3 (pfam0998, cd23206); orf3: CP (pfam00729)                                   |
| TC-Tombus-LV-53 | MR233-17E/2328 | 4137 nt | OR843673 | 17.7832 | 516    | orf1; orf2: CBPV-RdRp (cd23174)                                                               |
| TC-Tombus-LV-54 | MR233-17E/2345 | 4120 nt | OR843674 | 157.643 | 4614   | orf1; orf2: RdRp3 (pfam0998, cd23206); orf3: CP (pfam00729)                                   |
| TC-Tombus-LV-55 | MR233-17E/2365 | 4096 nt | OR843675 | 25.552  | 742    | orf1: P33 (pfam08500); orf2: RdRp3 (pfam0998, cd23242); orf3                                  |
| TC-Tombus-LV-56 | MR233-17E/2374 | 4089 nt | OR843676 | 16.8831 | 486    | orf1-par; orf2: RdRp3 (pfam0998, cd23206); orf3: CP (pfam00729)                               |
| TC-Tombus-LV-57 | MR233-17E/2385 | 4082 nt | OR843677 | 20918.6 | 608386 | orf1-par; orf2: RdRp3 (pfam0998, cd23179); orf3: CP (pfam00729)                               |
| TC-Tombus-LV-58 | MR233-17E/2413 | 4062 nt | OR843678 | 23.2937 | 674    | orf1; orf2: RdRp3 (pfam0998, cd23242); orf3: CP (pfam00729)                                   |

|                  |                |         |          |         |       |                                                                                                                                            |
|------------------|----------------|---------|----------|---------|-------|--------------------------------------------------------------------------------------------------------------------------------------------|
| TC-Tombus-LV-59  | MR233-17E/2435 | 4042 nt | OR843679 | 56.9807 | 1642  | orf1-par: P33 (pfam08500); orf2: RdRp3 (pfam00998, cd23242); orf3: CP (pfam00729)                                                          |
| TC-Tombus-LV-60  | MR233-17E/2438 | 4040 nt | OR843680 | 31.4067 | 904   | orf1; orf2: RdRp3 (pfam00998, cd23206); orf3: CP (pfam00729)                                                                               |
| TC-Tombus-LV-61  | MR233-17E/2466 | 4021 nt | OR843681 | 23.4628 | 674   | orf1: P33 (pfam08500); orf2: RdRp3 (pfam00998, cd23243); orf3: CP (pfam00729); orf4: P22 (pfam03558)                                       |
| TC-Tombus-LV-62  | MR233-17E/2471 | 4017 nt | OR843682 | 20.6433 | 582   | orf1; orf2: RdRp3 (pfam00998, cd23242); orf3: CP (pfam00729)                                                                               |
| TC-Tombus-LV-63  | MR233-17E/2497 | 3994 nt | OR843683 | 54.6557 | 1540  | orf1-par; orf2: RdRp3 (cd23241); orf3: CP (pfam00729)                                                                                      |
| TC-Tombus-LV-64  | MR233-17E/2502 | 3991 nt | OR843684 | 16.132  | 468   | orf1; orf2: RdRp3 (pfam00998, cd23242); orf3: CP (pfam00729)                                                                               |
| TC-Tombus-LV-65  | MR233-17E/2510 | 3982 nt | OR843685 | 28.0771 | 798   | orf1-par: P33 (pfam08500); orf2: RdRp3 (pfam00998, cd23242); orf3                                                                          |
| TC-Tombus-LV-66  | MR233-17D/4666 | 4211 nt | OR843686 | 69.2954 | 2086  | orf1; orf2: RdRp3 (pfam00998, cd23242); orf3: CP (pfam00729)                                                                               |
| TC-Tombus-LV-67  | MR233-17E/2542 | 3954 nt | OR843687 | 22.0693 | 626   | orf1-par: Panicovirus-RdRp (cd23238); orf2: RdRp3 (pfam00998, cd23206); orf3: CP (pfam00729)                                               |
| TC-Tombus-LV-68  | MR233-17E/2552 | 3949 nt | OR843688 | 88.7691 | 2516  | orf1-par; orf2: RdRp3 (pfam00998, cd23179); orf3                                                                                           |
| TC-Tombus-LV-69  | MR233-17E/2582 | 3929 nt | OR843689 | 28.5182 | 790   | orf1; orf2: RdRp3 (pfam00998, cd23242); orf3: CP (pfam00729)                                                                               |
| TC-Tombus-LV-70  | MR233-17D/1252 | 4189 nt | OR843690 | 76.0208 | 2300  | orf1; orf2: RdRp3 (pfam00998, cd23242); orf3: CP (pfam00729)                                                                               |
| TC-Tombus-LV-71  | MR233-17E/2625 | 3897 nt | OR843691 | 23.7259 | 664   | orf1-par: Panicovirus-RdRp (cd23238); orf2: RdRp3 (pfam00998, cd23242); orf3: CP (pfam00729)                                               |
| TC-Tombus-LV-72  | MR233-17E/2663 | 3871 nt | OR843692 | 49.4368 | 1360  | orf1-par: P33 (pfam08500); orf2: RdRp3 (pfam00998, cd23242); orf3: CP (pfam00729)                                                          |
| TC-Tombus-LV-73  | MR233-17E/2665 | 3871 nt | OR843693 | 22.504  | 624   | orf1-par: P33 (pfam08500); orf2: RdRp3 (pfam00998, cd23242); orf3: CP (pfam00729)                                                          |
| TC-Tombus-LV-74  | MR233-17E/2704 | 3847 nt | OR843694 | 23.8505 | 656   | orf1; orf2: RdRp3 (pfam00998, cd23242); orf3                                                                                               |
| TC-Tombus-LV-75  | MR233-17E/2724 | 3829 nt | OR843695 | 31.695  | 858   | orf1-par: P33 (pfam08500); orf2: RdRp3 (cd23239); orf3: CP (pfam00729)                                                                     |
| TC-Tombus-LV-76  | MR233-17E/2727 | 3828 nt | OR843696 | 25.61   | 686   | orf1; orf2: RdRp3 (pfam00998, cd23242); orf3: CP (pfam00729)                                                                               |
| TC-Tombus-LV-77  | MR233-17E/2739 | 3822 nt | OR843697 | 19.9969 | 544   | orf1-par; orf2: RdRp3 (pfam00998, cd23179); orf3: CP (pfam00729)                                                                           |
| TC-Tombus-LV-78  | MR233-17E/2882 | 3725 nt | OR843698 | 41.1487 | 1094  | orf1: P33 (pfam08500); orf2: RdRp3 (pfam00998, cd23242); orf3: CP (pfam00729)                                                              |
| TC-Tombus-LV-79  | MR233-17E/2941 | 3697 nt | OR843699 | 30.6833 | 800   | orf1; orf2: RdRp3 (pfam00998, cd23206); orf3                                                                                               |
| TC-Tombus-LV-80  | MR233-17E/2989 | 3665 nt | OR843700 | 13.743  | 358   | orf1; orf2: RdRp (cd23233); orf3-par: MP (pfam01573)                                                                                       |
| TC-Tombus-LV-81  | MR233-17E/3004 | 3659 nt | OR843701 | 22.9002 | 604   | orf1-par; orf2: RdRp3 (pfam00998, cd23179); orf3                                                                                           |
| TC-Tombus-LV-82  | MR233-17E/3033 | 3636 nt | OR843702 | 735.523 | 19118 | orf1: Panicovirus-RdRp (cd23238); orf2: RdRp3 (pfam00998, cd23242); orf3: MP1 (pfam05318); orf4: MP2 (pfam06692); orf5-par: CP (pfam00729) |
| TC-Tombus-LV-83  | MR233-17E/3068 | 3618 nt | OR843703 | 35.202  | 910   | orf1-par; orf2: RdRp3 (pfam00998, cd23241); orf3: CP (pfam00729)                                                                           |
| TC-Tombus-LV-84  | MR233-17E/3086 | 3608 nt | OR843704 | 23.6014 | 610   | orf1; orf2: RdRp3 (pfam00998, cd23206); orf3                                                                                               |
| TC-Tombus-LV-85  | MR233-17E/3091 | 3606 nt | OR843705 | 199.647 | 5124  | suppression of UAG and UAA codons; orf1-par; orf2: RdRp3 (pfam00998, cd23206); orf3: CP (pfam00729)                                        |
| TC-Tombus-LV-86  | MR233-17E/3106 | 3597 nt | OR843706 | 39.5076 | 1010  | orf1: P33 (pfam08500); orf2: RdRp3 (pfam00998, cd23206); orf3                                                                              |
| TC-Tombus-LV-87  | MR233-17E/3122 | 3587 nt | OR843707 | 188.892 | 4804  | suppression of UAG and UAA codons; orf1-par; orf2: RdRp3 (pfam00998, cd23206); orf3: CP (pfam00729)                                        |
| TC-Tombus-LV-88  | MR233-17E/3124 | 3587 nt | OR843708 | 26.4653 | 676   | orf1: RdRp3 (pfam00998, cd23179); orf2: Peptidase A21 (pfam03566)                                                                          |
| TC-Tombus-LV-89  | MR233-17E/3246 | 3529 nt | OR843709 | 33.9974 | 856   | orf1; orf2: RdRp3 (pfam00998, cd23179)                                                                                                     |
| TC-Tombus-LV-90  | MR233-17E/3270 | 3515 nt | OR843710 | 14.5807 | 364   | orf1: P33 (pfam08500); orf2: RdRp3 (pfam00998, cd23206); orf3                                                                              |
| TC-Tombus-LV-91  | MR233-17E/3280 | 3507 nt | OR843711 | 79.8155 | 1998  | orf1: P33 (pfam08500); orf2: RdRp3 (pfam00998, cd23206); orf3                                                                              |
| TC-Tombus-LV-92  | MR233-17E/3296 | 3497 nt | OR843712 | 24.0972 | 610   | orf1; orf2: RdRp3 (pfam00998, cd23179); orf3                                                                                               |
| TC-Tombus-LV-93  | MR233-17E/3303 | 3493 nt | OR843713 | 12.3856 | 308   | orf1-par: RdRp3 (pfam00998, cd23237); orf2; orf3-par                                                                                       |
| TC-Tombus-LV-94  | MR233-17E/3323 | 3480 nt | OR843714 | 22.9282 | 576   | orf1-par: P33 (pfam08500); orf2: RdRp (cd23243); orf3: CP (pfam00729)                                                                      |
| TC-Tombus-LV-95  | MR233-17E/3376 | 3458 nt | OR843715 | 44.2964 | 1104  | orf1-par: P33 (pfam08500); orf2: RdRp3 (pfam00998, cd23242); orf3: CP (pfam00729)                                                          |
| TC-Tombus-LV-96  | MR233-17E/3403 | 3449 nt | OR843716 | 13.1806 | 318   | orf1-par; orf2: RdRp3 (pfam00998, cd23206); orf3                                                                                           |
| TC-Tombus-LV-97  | MR233-17E/3478 | 3411 nt | OR843717 | 15.3313 | 372   | orf1-par; orf2-par: CP (pfam00729)                                                                                                         |
| TC-Tombus-LV-98  | MR233-17E/3511 | 3394 nt | OR843718 | 18.5854 | 462   | orf1: Panicovirus-RdRp (cd23238); orf2: RdRp3 (pfam00998, cd23206); orf3                                                                   |
| TC-Tombus-LV-99  | MR233-17E/3532 | 3383 nt | OR843719 | 13.4478 | 322   | orf1-par; orf2: RdRp3 (pfam00998, cd23237); orf3: CP (pfam00729); orf4                                                                     |
| TC-Tombus-LV-100 | MR233-17E/3551 | 3371 nt | OR843720 | 153.231 | 4878  | orf1-par; orf2: RdRp3 (pfam00998, cd23241); orf3: CP (pfam00729)                                                                           |
| TC-Tombus-LV-101 | MR233-17E/3562 | 3365 nt | OR843721 | 13.9955 | 328   | orf1-par; orf2: RdRp3 (pfam00998, cd23206); orf3: CP (pfam00729)                                                                           |
| TC-Tombus-LV-102 | MR233-17E/3580 | 3349 nt | OR843722 | 4143.25 | 94568 | orf1; orf2: RdRp3 (pfam00998, cd23206); orf3                                                                                               |
| TC-Tombus-LV-103 | MR233-17E/3591 | 3345 nt | OR843723 | 43.3229 | 1032  | orf1-par: Panicovirus-RdRp (cd23238); orf2: RdRp3 (pfam00998, cd23242); orf3                                                               |
| TC-Tombus-LV-104 | MR233-17E/3653 | 3320 nt | OR843724 | 28.775  | 678   | orf1-par; orf2: RdRp3 (pfam00998, cd23206); orf3                                                                                           |
| TC-Tombus-LV-105 | MR233-17E/3713 | 3296 nt | OR843725 | 10.034  | 236   | orf1-par; orf2: RdRp3 (pfam00998, cd23179)                                                                                                 |



|                  |                |         |          |         |        |                                                                                                                          |
|------------------|----------------|---------|----------|---------|--------|--------------------------------------------------------------------------------------------------------------------------|
| TC-Tombus-LV-106 | MR233-17E/3742 | 3284 nt | OR843726 | 38.5253 | 900    | orf1-par; orf2: RdRp3 (pfam00998, cd23206); orf3; orf4                                                                   |
| TC-Tombus-LV-107 | MR233-17E/3814 | 3248 nt | OR843727 | 105.969 | 2446   | orf1: P33 (pfam08500); orf2: RdRp3 (pfam00998, cd23241); orf3; orf4-par                                                  |
| TC-Tombus-LV-108 | MR233-17E/3849 | 3230 nt | OR843728 | 694.082 | 16036  | orf1; orf2: RdRp3 (pfam00998, cd23179)                                                                                   |
| TC-Tombus-LV-109 | MR233-17E/3857 | 3227 nt | OR843729 | 1054.12 | 24454  | orf1; orf2: RdRp3 (pfam00998, cd23179)                                                                                   |
| TC-Tombus-LV-110 | MR233-17E/3903 | 3208 nt | OR843730 | 59.6162 | 1846   | orf1; orf2: RdRp3 (pfam00998, cd23242); orf3: CP (pfam00729)                                                             |
| TC-Tombus-LV-111 | MR233-17E/3948 | 3186 nt | OR843731 | 64.9972 | 2006   | orf1; orf2: RdRp3 (pfam00998, cd23242); orf3: CP (pfam00729)                                                             |
| TC-Tombus-LV-112 | MR233-17E/3966 | 3178 nt | OR843732 | 37.5409 | 842    | orf1-par: P33 (pfam08500); orf2: RdRp3 (pfam00998, cd23242); orf3                                                        |
| TC-Tombus-LV-113 | MR233-17E/4271 | 3051 nt | OR843733 | 41.6317 | 1208   | orf1-par: P33 (pfam08500); orf2: RdRp3 (pfam00998, cd23244); orf3: MP1 (pfam17493); orf4: MP2; orf5: CP (pfam00729)      |
| TC-Tombus-LV-114 | MR233-17E/4333 | 3019 nt | OR843734 | 5535.93 | 145204 | orf1: ParB (pfam02195); orf2: RdRp3 (pfam00998, cd23179)                                                                 |
| TC-Tombus-LV-115 | MR233-17E/4395 | 3000 nt | OR843735 | 14.684  | 312    | orf1-par: P33 (pfam08500); orf2: RdRp3 (pfam00998, cd23242); orf3: CP (pfam00729)                                        |
| TC-Tombus-LV-116 | MR233-17E/4425 | 2988 nt | OR843736 | 90.0977 | 1914   | orf1-par: Panicovirus-RdRp (cd23238); orf2: RdRp3 (pfam00998, cd23241); orf3                                             |
| TC-Tombus-LV-117 | MR233-17E/4436 | 2983 nt | OR843737 | 253.643 | 5392   | orf1-par: Panicovirus-RdRp (cd23238); orf2: RdRp3 (pfam00998, cd23241); orf3: CP (pfam00729)                             |
| TC-Tombus-LV-118 | MR233-17E/4442 | 2982 nt | OR843738 | 10.3667 | 242    | orf1; orf2: RdRp3 (pfam00998, cd23241); orf3-par: CP (pfam00729)                                                         |
| TC-Tombus-LV-119 | MR233-17E/4454 | 2977 nt | OR843739 | 17.3863 | 368    | orf-par: VMethylTr (pfam01660), RdRp3 (pfam00998, cd23179)                                                               |
| TC-Tombus-LV-120 | MR233-17E/4468 | 2972 nt | OR843740 | 141.761 | 3004   | suppression of UAG and UAA codons; orf1-par: RdRp3 (pfam00998, cd23206); orf2: CP (pfam00729)                            |
| TC-Tombus-LV-121 | MR233-17E/4545 | 2941 nt | OR843741 | 35.4352 | 748    | orf1: Panicovirus-RdRp (cd23238); orf2: RdRp3 (pfam00998, cd23240); orf3                                                 |
| TC-Tombus-LV-122 | MR233-17E/4567 | 2934 nt | OR843742 | 47.3473 | 984    | orf1-par; orf2: RdRp3 (pfam00998, cd23179); orf3-par: CP (pfam00729)                                                     |
| TC-Tombus-LV-123 | MR233-17E/4573 | 2932 nt | OR843743 | 21.8663 | 456    | orf1-par; orf2: RdRp3 (pfam00998, cd23242); orf3-par: CP (pfam00729)                                                     |
| TC-Tombus-LV-124 | MR233-17E/4628 | 2916 nt | OR843744 | 150.824 | 3134   | orf1-par; orf2: RdRp3 (pfam00998, cd23242); orf3: CP (pfam00729)                                                         |
| TC-Tombus-LV-125 | MR233-17E/4634 | 2912 nt | OR843745 | 67.4681 | 1400   | orf1-par; orf2: RdRp3 (pfam00998, cd23241); orf3                                                                         |
| TC-Tombus-LV-126 | MR233-17E/4652 | 2906 nt | OR843746 | 133.734 | 2768   | orf1-par; orf2: RdRp3 (pfam00998, cd23242); orf3: CP (pfam00729)                                                         |
| TC-Tombus-LV-127 | MR233-17E/4682 | 2894 nt | OR843747 | 127.313 | 2644   | orf1-par; orf2: RdRp3 (pfam00998, cd23239); orf3; orf4-par                                                               |
| TC-Tombus-LV-128 | MR233-17E/4701 | 2887 nt | OR843748 | 17.682  | 362    | orf1-par; orf2: RdRp3 (pfam00998, cd23242); orf3: CP (pfam00729)                                                         |
| TC-Tombus-LV-129 | MR233-17E/4712 | 2882 nt | OR843749 | 18.432  | 382    | orf1-par: RdRp3 (pfam00998, cd23206); orf2: CP (pfam00729)                                                               |
| TC-Tombus-LV-130 | MR233-17D/6096 | 2958 nt | OR843750 | 32.1018 | 678    | suppression of UAG and UAA codons; orf1-par: RdRp3 (pfam00998, cd23206); orf2: CP (pfam00729)                            |
| TC-Tombus-LV-131 | MR233-17E/4740 | 2871 nt | OR843751 | 39.3152 | 806    | orf1-par; orf2: RdRp3 (pfam00998, cd23240); orf3-par                                                                     |
| TC-Tombus-LV-132 | MR233-17E/4770 | 2861 nt | OR843752 | 28.8724 | 582    | orf1-par; orf2: RdRp3 (pfam00998, cd23240); orf3                                                                         |
| TC-Tombus-LV-133 | MR233-17E/4812 | 2852 nt | OR843753 | 350.341 | 8872   | suppression of UAG and UAA codons; orf1-par; orf2: RdRp3 (pfam00998, cd23206); orf3: CP (pfam00729)                      |
| TC-Tombus-LV-134 | MR233-17E/4821 | 2848 nt | OR843754 | 530.532 | 10730  | orf1-par: P33 (pfam08500); orf2: RdRp3 (pfam00998, cd23242); orf3                                                        |
| TC-Tombus-LV-135 | MR233-17E/4828 | 2846 nt | OR843755 | 283.855 | 5726   | orf1-par; orf2: RdRp3 (pfam00998, cd23242); orf3                                                                         |
| TC-Tombus-LV-136 | MR233-17E/4839 | 2843 nt | OR843756 | 30.3345 | 618    | orf1; orf2; orf3-par: RdRp3 (pfam00998, cd23206)                                                                         |
| TC-Tombus-LV-137 | MR233-17E/4906 | 2826 nt | OR843757 | 152.048 | 3050   | orf1: P33 (pfam08500); orf2: RdRp3 (pfam00998, cd23242); orf3: CP (pfam00729)                                            |
| TC-Tombus-LV-138 | MR233-17E/4932 | 2818 nt | OR843758 | 50.1838 | 998    | orf1: P33 (pfam08500); orf2: RdRp3 (pfam00998, cd23240); orf3: CP (pfam00729)                                            |
| TC-Tombus-LV-139 | MR233-17E/4948 | 2813 nt | OR843759 | 1472.17 | 38374  | orf1: ParB (pfam02195); orf2: RdRp3 (pfam00998, cd23179)                                                                 |
| TC-Tombus-LV-140 | MR233-17E/4951 | 2813 nt | OR843760 | 13.3957 | 268    | orf1-par; orf2: RdRp3 (pfam00998, cd23242); orf3: CP (pfam00729)                                                         |
| TC-Tombus-LV-141 | MR233-17E/4965 | 2809 nt | OR843761 | 19.7156 | 396    | orf1-par; orf2: RdRp3 (pfam00680, cd23174)                                                                               |
| TC-Tombus-LV-142 | MR233-17E/4967 | 2808 nt | OR843762 | 34.7714 | 696    | orf1-par: RdRp3 (pfam00998, cd23206); orf2: CP (pfam00729)                                                               |
| TC-Tombus-LV-143 | MR233-17E/5032 | 2789 nt | OR843763 | 32.8021 | 652    | orf1-par: P33 (pfam08500); orf2: RdRp3 (pfam00998, cd23240); orf3: CP (pfam00729)                                        |
| TC-Tombus-LV-144 | MR233-17E/5085 | 2774 nt | OR843764 | 30.9211 | 608    | orf1; orf2: RdRp3 (pfam00998, cd23179)                                                                                   |
| TC-Tombus-LV-145 | MR233-17E/5164 | 2754 nt | OR843765 | 13.8021 | 274    | orf1; orf2: CBPV-RdRp (cd23174)                                                                                          |
| TC-Tombus-LV-146 | MR233-17E/5202 | 2743 nt | OR843766 | 17.3358 | 356    | orf1-par; orf2: RdRp3 (pfam00998, cd23206); orf3                                                                         |
| TC-Tombus-LV-147 | MR233-17E/5213 | 3830 nt | OR843767 | 119.424 | 3264   | orf1-par; orf2: RdRp3 (pfam00998, cd23206); orf3: CP (pfam00729)                                                         |
| TC-Tombus-LV-148 | MR233-17E/5352 | 2708 nt | OR843768 | 14.0798 | 274    | orf1-par: RdRp3 (pfam00998, cd23206); orf2: CP (pfam00729)                                                               |
| TC-Tombus-LV-149 | MR233-17E/9898 | 3547 nt | OR843769 | 49.3045 | 1254   | orf0-par; orf1; orf2: RdRp3 (pfam00998, cd23206); orf3-par                                                               |
| TC-Tombus-LV-150 | MR233-17E/5470 | 2676 nt | OR843770 | 764.984 | 14550  | orf1-par; orf2: RdRp3 (pfam00998, cd23179)                                                                               |
| TC-Tombus-LV-151 | MR233-17E/5518 | 2662 nt | OR843771 | 95.9574 | 3006   | orf1; orf2: RdRp3 (pfam00998, cd23206); orf3: CP (pfam00729)                                                             |
| TC-Tombus-LV-152 | MR233-17E/5562 | 2650 nt | OR843772 | 13.9389 | 266    | orf1-par: RdRp3 (pfam00998, cd23206); orf2                                                                               |
| TC-Tombus-LV-153 | MR233-17E/5662 | 2624 nt | OR843773 | 26.1598 | 704    | orf1: Panicovirus-RdRp (cd23238); orf2: RdRp3 (pfam00998, cd23242); orf3: MP/p7A (pfam05318); orf4; orf5: CP (pfam00729) |

|                  |                 |         |          |         |         |                                                                                                         |
|------------------|-----------------|---------|----------|---------|---------|---------------------------------------------------------------------------------------------------------|
| TC-Tombus-LV-154 | MR233-17E/5707  | 2613 nt | OR843774 | 11.9399 | 224     | orf1-par: P33 (pfam08500); orf2: RdRp3 (pfam00998, cd23206)                                             |
| TC-Tombus-LV-155 | MR233-17E/14189 | 4178 nt | OR843775 | 23.7645 | 700     | orf1: P33 (pfam08500); orf2: RdRp3 (pfam00998, cd23242); orf3: CP (pfam00729)                           |
| TC-Tombus-LV-156 | MR233-17E/5746  | 2604 nt | OR843776 | 8.08909 | 154     | orf1-par; orf2: RdRp3 (pfam00998, cd23242)                                                              |
| TC-Tombus-LV-157 | MR233-17E/5754  | 2601 nt | OR843777 | 12.3779 | 248     | orf1-par: RdRp3 (pfam00998, cd23179); orf2: CP (pfam00729)                                              |
| TC-Tombus-LV-158 | MR233-17E/5758  | 4221 nt | OR843778 | 11.2507 | 336     | orf1; orf2: RdRp3 (pfam00998, cd23242); orf3: PLA2 (cd04706), CP (pfam00729)                            |
| TC-Tombus-LV-159 | MR233-17E/5821  | 2587 nt | OR843779 | 17.4682 | 424     | orf1: ParB (pfam02195); orf2-par: RdRp2 (pfam00978, cd23179)                                            |
| TC-Tombus-LV-160 | MR233-17E/5835  | 2584 nt | OR843780 | 17.4981 | 318     | orf1-par; orf2: RdRp3 (pfam00998, cd23179)                                                              |
| TC-Tombus-LV-161 | MR233-17E/5870  | 2578 nt | OR843781 | 18.922  | 344     | orf1: RdRp3 (pfam00998, cd23206); orf2                                                                  |
| TC-Tombus-LV-162 | MR233-17E/5910  | 4587 nt | OR843782 | 22.5701 | 740     | orf1; orf2: RdRp3 (pfam00998, cd23242); orf3: CP (pfam00729)                                            |
| TC-Tombus-LV-163 | MR233-17E/5953  | 2555 nt | OR843783 | 13.319  | 240     | orf1-par: RdRp3 (pfam00998, cd23242); orf2; orf3                                                        |
| TC-Tombus-LV-164 | MR233-17E/6073  | 2526 nt | OR843784 | 10.3234 | 184     | orf1-par: RdRp3 (pfam00998, cd23179); orf2                                                              |
| TC-Tombus-LV-165 | MR233-17E/6207  | 4168 nt | OR843785 | 29.0054 | 838     | orf1: P33 (pfam0855); orf2: RdRp3 (pfam00998, cd23239); orf3: CP (pfam00729)                            |
| TC-Tombus-LV-166 | MR233-17E/6222  | 2495 nt | OR843786 | 10.2834 | 188     | orf1-par: RdRp3 (pfam00998, cd23239); orf2: CP (pfam00729)                                              |
| TC-Tombus-LV-167 | MR233-17E/6255  | 4258 nt | OR843787 | 53.7586 | 1644    | orf1; orf2: RdRp3 (pfam00998, cd23242); orf3; orf4: CP (pfam00729)                                      |
| TC-Tombus-LV-168 | MR233-17E/6454  | 2449 nt | OR843788 | 559.307 | 9788    | orf1-par; orf2: RdRp3 (pfam00998, cd23179)                                                              |
| TC-Tombus-LV-169 | MR233-17D/7860  | 3492 nt | OR843789 | 37.695  | 946     | orf1: P33 (pfam08500); orf2: RdRp3 (pfam00998, cd23206); orf3                                           |
| TC-Tombus-LV-170 | MR233-17E/6769  | 2386 nt | OR843790 | 13.0457 | 218     | orf1-par: P33 (pfam0855); orf2: RdRp3 (pfam00998, cd23242); orf3-par: CP (pfam00729)                    |
| TC-Tombus-LV-171 | MR233-17E/6842  | 4014 nt | OR843791 | 211.881 | 6060    | orf1-par: Panicovirus-RdRp (cd23238); orf2: RdRp3 (pfam00998, cd23242); orf3: CP (pfam00729); orf4      |
| TC-Tombus-LV-172 | MR233-17E/6924  | 2893 nt | OR843792 | 68815.7 | 1428396 | orf1; orf2: RdRp (cd23179)                                                                              |
| TC-Tombus-LV-173 | MR233-17E/6927  | 2356 nt | OR843793 | 24.927  | 414     | orf1; orf2: RdRp3 (pfam00998; cd23242)                                                                  |
| TC-Tombus-LV-174 | MR233-17E/6963  | 2348 nt | OR843794 | 18.7159 | 320     | orf1-par: RdRp3 (pfam00998, cd23239); orf2: PLA2 (cd04706), CP (pfam00729)                              |
| TC-Tombus-LV-175 | MR233-17E/6977  | 3888 nt | OR843795 | 25.1337 | 690     | orf1; orf2: RdRp3 (pfam00998, cd23179)                                                                  |
| TC-Tombus-LV-176 | MR233-17E/6986  | 2344 nt | OR843796 | 11.9646 | 198     | orf1-par: RdRp3 (pfam00998, cd23242); orf2: orf3: CP (pfam00729)                                        |
| TC-Tombus-LV-177 | MR233-17E/7001  | 2861 nt | OR843797 | 87.0003 | 1760    | orf1-par; orf2: RdRp3 (pfam00998, cd23179)                                                              |
| TC-Tombus-LV-178 | MR233-17E/7046  | 3264 nt | OR843798 | 13.8505 | 314     | orf1; orf2: RdRp3 (pfam00998, cd23242); orf3                                                            |
| TC-Tombus-LV-179 | MR233-17E/4881  | 4254 nt | OR843799 | 123.851 | 3728    | orf1; orf2: RdRp3 (pfam00998, cd23242); orf3: CP (pfam00729); orf4                                      |
| TC-Tombus-LV-180 | MR233-17E/7345  | 2286 nt | OR843800 | 13.0542 | 212     | suppression of UAG and UAA codons; orf1-par; orf2: RdRp3 (pfam00998, cd23206); orf3-par: CP (pfam00729) |
| TC-Tombus-LV-181 | MR233-17E/7357  | 3555 nt | OR843801 | 996.337 | 25298   | suppression of UAG and UAA codons: orf1-par; orf2: RdRp3 (pfam00998, cd23206); orf3: CP (pfam00729)     |
| TC-Tombus-LV-182 | MR233-17E/7451  | 2267 nt | OR843802 | 10.7186 | 176     | orf1-par: RdRp3 (pfam00998, cd23206); orf2-par: CP (pfam00729)                                          |
| TC-Tombus-LV-183 | MR233-17E/7474  | 2264 nt | OR843803 | 12.2597 | 196     | orf1-par; orf2: RdRp3 (pfam00998, cd23179); orf3-par: CP (pfam11729)                                    |
| TC-Tombus-LV-184 | MR233-17D/2652  | 2841 nt | OR843804 | 30.5945 | 626     | orf1-par; orf2: RdRp3 (pfam00998, cd23242); orf3                                                        |
| TC-Tombus-LV-185 | MR233-17E/7986  | 2186 nt | OR843805 | 14.57   | 226     | orf1-par: P33 (pfam08500); orf2: RdRp3 (pfam00998, cd23240)                                             |
| TC-Tombus-LV-186 | MR233-17E/8076  | 2174 nt | OR843806 | 16.1812 | 248     | orf1-par: RdRp3 (pfam00998, cd23242); orf2: CP (pfam00729)                                              |
| TC-Tombus-LV-187 | MR233-17E/8198  | 2156 nt | OR843807 | 28.9133 | 438     | orf1-par; orf2: RdRp3 (pfam00998, cd23242); orf3-par                                                    |
| TC-Tombus-LV-188 | MR233-17E/8280  | 2146 nt | OR843808 | 25.2307 | 382     | orf1: P33 (pfam08500); orf2-par: RdRp3 (pfam00998, cd23206)                                             |
| TC-Tombus-LV-189 | MR233-17E/8334  | 2138 nt | OR843809 | 23.703  | 360     | suppression of UAG and UAA codons; orf-par: CP (pfam00729)                                              |
| TC-Tombus-LV-190 | MR233-17E/8438  | 2122 nt | OR843810 | 12.6159 | 194     | suppression of UAG and UAA codons; orf1-par: RdRp3 (pfam00998, cd23244); orf2: CP (pfam00729)           |
| TC-Tombus-LV-191 | MR233-17E/8485  | 2863 nt | OR843811 | 25.8893 | 526     | orf1-par; orf2: RdRp3 (pfam00998, cd23240); orf3                                                        |
| TC-Tombus-LV-192 | MR233-17E/8559  | 2108 nt | OR843812 | 9.14469 | 136     | orf1-par; orf2: CP (pfam00729)                                                                          |
| TC-Tombus-LV-193 | MR233-17E/8570  | 2106 nt | OR843813 | 14.916  | 226     | orf1-par: RdRp3 (pfam00998, cd23206); orf2                                                              |
| TC-Tombus-LV-194 | MR233-17E/8636  | 3821 nt | OR843814 | 17.9142 | 484     | orf1; orf2: RdRp3 (pfam00998, cd23206); orf3: CP (pfam00729)                                            |
| TC-Tombus-LV-195 | MR233-17E/8673  | 2093 nt | OR843815 | 197.51  | 2960    | suppression of UAG and UAA codons: orf1-par; orf2-par: RdRp3 (pfam00998, cd23206)                       |
| TC-Tombus-LV-196 | MR233-17E/8761  | 2082 nt | OR843816 | 11.5672 | 168     | orf1-par: RdRp3 (pfam00998, cd23206); orf2                                                              |
| TC-Tombus-LV-197 | MR233-17E/4162  | 3095 nt | OR843817 | 1940.64 | 42732   | orf1-par; orf2: RdRp2 (pfam00978, cd01699)                                                              |
| TC-Tombus-LV-198 | MR233-17/5670   | 5024 nt | OR843818 | 149.401 | 5366    | orf1-par; orf2: RdRp1 (pfam00680, cd23173); orf3: CP (pfam00729)                                        |
| TC-Tombus-LV-199 | MR233-17E/1826  | 4982 nt | OR843819 | 353.77  | 12594   | orf1-par; orf2: RdRp1 (pfam00680, cd23173); orf3: CP (pfam00729)                                        |
| TC-Tombus-LV-200 | MR233-17E/10090 | 1938 nt | OR843820 | 23.4541 | 328     | orf1: P33 (pfam08500); orf2-par: RdRp3 (pfam00998, cd23244)                                             |
| TC-Tombus-LV-201 | MR233-17D/5671  | 2911 nt | OR843821 | 96.5946 | 2002    | orf1-par; orf2: RdRp1 (pfam00680; cd23173); orf3: CP (pfam00729)                                        |
| TC-Tombus-LV-202 | MR233-17/12072  | 1967 nt | OR843822 | 30.303  | 432     | orf1-par; orf2: CP (pfam00729)                                                                          |

|                  |                 |         |          |         |       |                                                                                                          |
|------------------|-----------------|---------|----------|---------|-------|----------------------------------------------------------------------------------------------------------|
| TC-Tombus-LV-203 | MR233-17E/9681  | 1981 nt | OR843823 | 43.3049 | 616   | orf1: Panicosvirus-RdRp (cd23238); orf2-par: RdRp3 (pfam00998, cd23242)                                  |
| TC-Tombus-LV-204 | MR233-17E/9685  | 1981 nt | OR843824 | 9.73195 | 140   | orf1-par: RdRp3 (pfam00998, cd23242); orf2: CP (pfam00729)                                               |
| TC-Tombus-LV-205 | MR233-17E/9781  | 2552 nt | OR843825 | 24.8734 | 454   | orf1-par: P33 (pfam08500); orf2: RdRp3 (pfam00998, cd23242); orf3-par                                    |
| TC-Tombus-LV-206 | MR233-17E/5426  | 2688 nt | OR843826 | 84.292  | 1622  | orf1-par; orf2: RdRp3 (pfam00998, cd23242)                                                               |
| TC-Tombus-LV-207 | MR233-17E/10491 | 2121 nt | OR843827 | 16.8029 | 254   | orf1-par: RdRp3 (pfam00998, cd23236); orf2: CP (pfam00729)                                               |
| TC-Tombus-LV-208 | MR233-17D/10691 | 2288 nt | OR843828 | 49.3239 | 802   | orf1-par: RdRp3 (pfam00998, cd23236); orf2: CP (pfam00729); orf3: P22 (pfam03558)                        |
| TC-Tombus-LV-209 | MR233-17E/13549 | 3791 nt | OR843829 | 252.348 | 6806  | orf1-par: P33 (pfam08500); orf2: RdRp3 (pfam00998, cd23236); orf3: CP (pfam00729); orf4: P22 (pfam03558) |
| TC-Tombus-LV-210 | MR233-17/17622  | 3545 nt | OR843830 | 77.4666 | 1970  | orf1-par: RdRp3 (pfam00998, cd23236); orf2: CP (pfam00729); orf3: P22 (pfam03558)                        |
| TC-Tombus-LV-211 | MR233-17E/1027  | 6472 nt | OR843831 | 56.5596 | 2624  | orf1-par; orf2: RdRp (cd01699)                                                                           |
| TC-Tombus-LV-212 | MR233-17E/814   | 6883 nt | OR843832 | 22.2024 | 1102  | orf1: RdRp (cd01699)                                                                                     |
| TC-Tombus-LV-213 | MR233-17E/1476  | 5199 nt | OR843833 | 278.516 | 10312 | orf1; orf2: RdRp3 (pfam00998, cd23179); orf3; orf4                                                       |
| TC-Tombus-LV-214 | MR233-17E/1336  | 5490 nt | OR843834 | 17.7424 | 696   | orf1; orf2-par: noda-like RdRp (cd23173)                                                                 |
| TC-Tombus-LV-215 | MR233-17D/76372 | 1906 nt | OR843835 | 19.4963 | 264   | orf1-par: RdRp3 (pfam00998, cd23236); orf2: CP (pfam00729); orf3-par: P22 (pfam03558)                    |
| TC-Tombus-LV-216 | MR233-17E/10743 | 2782 nt | OR843836 | 9.22466 | 178   | orf1-par: RdRp3 (pfam00998, cd23242); orf2: CP (pfam00729)                                               |
| TC-Tombus-LV-217 | MR233-17E/10904 | 1867 nt | OR843837 | 15.2989 | 202   | orf1-par: RdRp3 (pfam00998, cd23242); orf2                                                               |
| TC-Tombus-LV-218 | MR233-17E/10985 | 2384 nt | OR843838 | 37.5692 | 630   | orf1: P33 (pfam08500); orf2: RdRp (cd23240); orf3-par: CP (pfam00729)                                    |
| TC-Tombus-LV-219 | MR233-17E/11065 | 1852 nt | OR843839 | 20.0248 | 260   | orf1-par; orf2-par: RdRp3 (pfam00998, cd23206)                                                           |
| TC-Tombus-LV-220 | MR233-17E/12068 | 1774 nt | OR843840 | 9.11894 | 114   | orf1-par; orf2-par: RdRp3 (pfam00998, cd23179)                                                           |
| TC-Tombus-LV-221 | MR233-17E/10954 | 2846 nt | OR843841 | 76.9807 | 1564  | orf1-par: RdRp3 (pfam00998, cd23179); orf2                                                               |
| TC-Tombus-LV-222 | MR233-17D/2000  | 1359 nt | OR843842 | 237.829 | 2314  | orf1: CP (pfam00729); orf2                                                                               |
| TC-Tombus-LV-223 | MR233-17E/12101 | 1771 nt | OR843843 | 14.5726 | 182   | orf: CP (pfam00729)                                                                                      |
| TC-Tombus-LV-224 | MR233-17E/12241 | 1762 nt | OR843844 | 6.82804 | 86    | orf1-par; orf2-par: RdRp (cd23206)                                                                       |
| TC-Tombus-LV-225 | MR233-17E/12295 | 1758 nt | OR843845 | 6.7025  | 86    | orf-par: RdRp3 (pfam00998, cd23179)                                                                      |
| TC-Tombus-LV-226 | MR233-17E/12345 | 1754 nt | OR843846 | 14.0296 | 176   | orf1; orf2-par: RdRp3 (pfam00998, cd23206)                                                               |
| TC-Tombus-LV-227 | MR233-17E/12390 | 1751 nt | OR843847 | 11.9754 | 156   | orf1-par: RdRp3 (pfam00998, cd23206); orf2-par: CP (pfam00729)                                           |
| TC-Tombus-LV-228 | MR233-17E/12415 | 1749 nt | OR843848 | 22.1727 | 278   | orf1-par: RdRp3 (pfam00998, cd23244); orf2: CP (pfam00729)                                               |
| TC-Tombus-LV-229 | MR233-17E/12934 | 1713 nt | OR843849 | 5.95914 | 70    | orf1-par; orf2-par: RdRp3 (pfam00998, cd23206)                                                           |
| TC-Tombus-LV-230 | MR233-17E/12986 | 1914 nt | OR843850 | 22.3558 | 304   | orf1; orf2-par: RdRp3 (pfam00998, cd23206)                                                               |
| TC-Tombus-LV-231 | MR233-17E/13018 | 1707 nt | OR843851 | 9.42121 | 114   | orf1-par: RdRp3 (pfam00998, cd23206); orf2-par: CP (pfam00729)                                           |
| TC-Tombus-LV-232 | MR233-17E/13081 | 1703 nt | OR843852 | 9.35643 | 112   | orf1-par; orf2-par: RdRp3 (pfam00998, cd23240)                                                           |
| TC-Tombus-LV-233 | MR233-17E/13174 | 1697 nt | OR843853 | 956099  | 118   | orf1-par; orf2-par: RdRp3 (pfam00998, cd23179)                                                           |
| TC-Tombus-LV-234 | MR233-17E/13189 | 1696 nt | OR843854 | 9.898   | 122   | suppression of UAG and UAA codons; orf1-par; orf2-par: RdRp (cd23206)                                    |
| TC-Tombus-LV-235 | MR233-17E/8093  | 4091 nt | OR843855 | 101.536 | 2948  | orf1-par; orf2: RdRp3 (pfam00998, cd23206); orf3: CP (pfam00729)                                         |
| TC-Tombus-LV-236 | MR233-17E/13295 | 1689 nt | OR843856 | 10.2872 | 126   | orf1-par: RdRp3 (pfam00998, cd23237); orf2-par: CP (pfam00729)                                           |
| TC-Tombus-LV-237 | MR233-17E/13968 | 2961 nt | OR843857 | 10.4583 | 222   | orf1; orf2: RdRp3 (pfam00998, cd23242); orf3-par                                                         |
| TC-Tombus-LV-238 | MR233-17/13984  | 1782 nt | OR843858 | 12.5684 | 156   | orf1-par: P33 (pfam08500); orf2-par: RdRp3 (pfam00998, cd23240)                                          |
| TC-Tombus-LV-239 | MR233-17E/14041 | 1642 nt | OR843859 | 8.08709 | 94    | orf-par: RdRp3 (pfam00998, cd23179)                                                                      |
| TC-Tombus-LV-240 | MR233-17E/14258 | 3312 nt | OR843860 | 131.956 | 3144  | orf1-par: RdRp3 (pfam00998, cd23179); orf2: CP (pfam00729)                                               |
| TC-Tombus-LV-241 | MR233-17E/14259 | 2605 nt | OR843861 | 96.6614 | 1812  | orf-par: RdRp3 (pfam00998, cd23179)                                                                      |
| TC-Tombus-LV-242 | MR233-17E/14302 | 3099 nt | OR843862 | 6.62343 | 144   | orf1-par; orf2: RdRp3 (pfam00998, cd23242); orf3-par: CP (pfam00729)                                     |
| TC-Tombus-LV-243 | MR233-17E/14504 | 1614 nt | OR843863 | 5.47026 | 60    | suppression of UAG and UAA codons; orf1-par: RdRp3 (pfam00998, cd23206); orf2-par: CP (pfam00729)        |
| TC-Tombus-LV-244 | MR233-17E/15069 | 1743 nt | OR843864 | 8.69421 | 82    | orf1-par: RdRp3 (pfam00998, cd23239); orf2-par: PLA2 (cd00618), CP (pfam00729)                           |
| TC-Tombus-LV-245 | MR233-17E/31227 | 3022 nt | OR843865 | 24.6625 | 526   | orf1-par: P33 (pfam08500); orf2: RdRp3 (pfam00998, cd23244); orf3-par                                    |
| TC-Tombus-LV-246 | MR233-17E/15198 | 2898 nt | OR843866 | 14.1825 | 284   | orf1-par: P33 (pfam08500); orf2: RdRp3 (pfam00998, cd23206); orf3: CP (pfam00729)                        |
| TC-Tombus-LV-247 | MR233-17E/15460 | 1564 nt | OR843867 | 6.29923 | 70    | orf1-par; orf2-par: CBPV-RdRp (cd23174)                                                                  |
| TC-Tombus-LV-248 | MR233-17E/15832 | 1546 nt | OR843868 | 7.94955 | 86    | orf1-par; orf2-par: RdRp3 (pfam00998, cd23239)                                                           |
| TC-Tombus-LV-249 | MR233-17E/15888 | 1543 nt | OR843869 | 20.6086 | 226   | orf-par: CP (pfam00729)                                                                                  |
| TC-Tombus-LV-250 | MR233-17E/16172 | 2874 nt | OR843870 | 24.222  | 492   | orf1-par; orf2: RdRp3 (pfam00998, cd23206); orf3: CP (pfam00729)                                         |
| TC-Tombus-LV-251 | MR233-17E/16227 | 3259 nt | OR843871 | 36.4851 | 852   | orf1-par: RdRp3 (pfam00998, cd23206); orf2; orf3: CP (pfam00729)                                         |
| TC-Tombus-LV-252 | MR233-17E/16281 | 3864 nt | OR843872 | 120.952 | 3330  | orf1: P33 (pfam08500); orf2: RdRp3 (pfam00998, cd23244); orf3: CP (pfam00729)                            |
| TC-Tombus-LV-253 | MR233-17E/16474 | 1513 nt | OR843873 | 14.115  | 152   | orf-par: CP (pfam00729)                                                                                  |

|                  |                  |         |          |         |      |                                                                                                   |
|------------------|------------------|---------|----------|---------|------|---------------------------------------------------------------------------------------------------|
| TC-Tombus-LV-254 | MR233-17D/11999  | 2599 nt | OR843874 | 85.5278 | 1620 | orf1-par: RdRp3 (pfam00998, cd23244); orf2: CP (pfam00729)                                        |
| TC-Tombus-LV-255 | MR233-17E/16842  | 1497 nt | OR843875 | 9.42151 | 98   | orf1-par: RdRp3 (pfam00998, cd23206); orf2-par                                                    |
| TC-Tombus-LV-256 | MR233-17E/17057  | 1488 nt | OR843876 | 465.605 | 4952 | orf: CP (pfam11729)                                                                               |
| TC-Tombus-LV-257 | MR233-17E/17101  | 1487 nt | OR843877 | 7.01479 | 74   | orf1; orf2: RdRp3 (pfam00998, cd23179)                                                            |
| TC-Tombus-LV-258 | MR233-17E/17288  | 1479 nt | OR843878 | 12.3867 | 130  | orf1-par: RdRp3 (pfam00998, cd23206); orf2-par                                                    |
| TC-Tombus-LV-259 | MR233-17E/17568  | 1467 nt | OR843879 | 24.5106 | 258  | orf-par: CP (pfam00729)                                                                           |
| TC-Tombus-LV-260 | MR233-17E/17828  | 1457 nt | OR843880 | 15.0384 | 154  | orf1-par: RdRp3 (pfam00998, cd23206); orf2-par                                                    |
| TC-Tombus-LV-261 | MR233-17E/18091  | 1446 nt | OR843881 | 143.003 | 1486 | suppression of UAG and UAA codons; orf: CP (pfam00729)                                            |
| TC-Tombus-LV-262 | MR233-17E/18123  | 1445 nt | OR843882 | 8.48997 | 86   | orf1-par: RdRp3 (pfam00998, cd23242); orf2                                                        |
| TC-Tombus-LV-263 | MR233-17/18241   | 1440 nt | OR843883 | 9.91736 | 110  | orf1-par; orf2-par: RdRp3 (pfam00998, cd23241)                                                    |
| TC-Tombus-LV-264 | MR233-17E/18330  | 1977 nt | OR843884 | 36.9555 | 524  | orf1-par: RdRp3 (pfam00998, cd23242); orf2: CP (pfam00729)                                        |
| TC-Tombus-LV-265 | MR233-17E/18332  | 1436 nt | OR843885 | 15.9854 | 162  | orf-par: CP (pfam00729)                                                                           |
| TC-Tombus-LV-266 | MR233-17E/18411  | 1433 nt | OR843886 | 7.01256 | 72   | orf1-par; orf2-par: RdRp3 (pfam00998, cd23179)                                                    |
| TC-Tombus-LV-267 | MR233-17E/18776  | 1419 nt | OR843887 | 18.3805 | 190  | orf1; orf2-par: RdRp3 (pfam00998, cd23206)                                                        |
| TC-Tombus-LV-268 | MR233-17E/18779  | 1627 nt | OR843888 | 13.4831 | 156  | orf1-par: RdRp3 (pfam00998, cd23243); orf2-par: CP (pfam00729)                                    |
| TC-Tombus-LV-269 | MR233-17E/18874  | 1416 nt | OR843889 | 4.84534 | 48   | orf1-par: RdRp3 (pfam00998, cd23242); orf2                                                        |
| TC-Tombus-LV-270 | MR233-17E/19161  | 1634 nt | OR843890 | 4.85129 | 56   | orf1-par: Panicovirus-RdRp (cd23238); orf2-par: RdRp3 (pfam00998, cd23206)                        |
| TC-Tombus-LV-271 | MR233-17E/19317  | 1719 nt | OR843891 | 13.6353 | 164  | orf1-par; orf2-par: RdRp3 (pfam00998, cd23206)                                                    |
| TC-Tombus-LV-272 | MR233-17E/19417  | 1395 nt | OR843892 | 150.365 | 1504 | orf: CP (pfam00729)                                                                               |
| TC-Tombus-LV-273 | MR233-17E/19604  | 1388 nt | OR843893 | 6.43156 | 64   | orf-par: RdRp3 (pfam00998, cd23242)                                                               |
| TC-Tombus-LV-274 | MR233-17D/205827 | 1455 nt | OR843894 | 8.00275 | 84   | orf1-par: RdRp3 (pfam00998, cd23242); orf2-par                                                    |
| TC-Tombus-LV-275 | MR233-17E/19972  | 1375 nt | OR843895 | 22.9418 | 230  | orf: CP (pfam00729)                                                                               |
| TC-Tombus-LV-276 | MR233-17E/20039  | 1373 nt | OR843896 | 6.47706 | 62   | orf-par: RdRp3 (pfam00998, cd23179)                                                               |
| TC-Tombus-LV-277 | MR233-17E/20409  | 1360 nt | OR843897 | 188.612 | 2734 | orf: CP (pfam00729)                                                                               |
| TC-Tombus-LV-278 | MR233-17E/20792  | 1347 nt | OR843898 | 18.9272 | 182  | orf-par: RdRp (cd23206)                                                                           |
| TC-Tombus-LV-279 | MR233-17E/20873  | 1345 nt | OR843899 | 6.57621 | 62   | orf-par: RdRp3 (pfam00998, cd23179)                                                               |
| TC-Tombus-LV-280 | MR233-17E20967   | 1661 nt | OR843900 | 84.9825 | 1002 | orf1-par: RdRp3 (pfam00998, cd23242); orf2-par                                                    |
| TC-Tombus-LV-281 | MR233-17E/354003 | 2325 nt | OR843901 | 93.1996 | 1552 | orf1-par: RdRp3 (pfam00998, cd23236); orf2: CP (pfam00729); orf3-par: P22 (pfam03558)             |
| TC-Tombus-LV-282 | MR233-17E/21417  | 1329 nt | OR843902 | 3.80286 | 36   | suppression of UAG and UAA codons; orf1-par; orf2-par: CP (pfam00729)                             |
| TC-Tombus-LV-283 | MR233-17E/21461  | 1720 nt | OR843903 | 93.2884 | 1156 | suppression of UAG and UAA codons; orf1-par: RdRp (cd23243); orf2: CP (pfam00729); orf3-par       |
| TC-Tombus-LV-284 | MR233-17E/21823  | 1317 nt | OR843904 | 5.78664 | 54   | orf-par: RdRp2 (pfam00978, cd01699)                                                               |
| TC-Tombus-LV-285 | MR233-17E/102450 | 5410 nt | OR843905 | 32.9854 | 1270 | orf1; orf2: RdRp3 (pfam00998, cd23206); orf3: CP (pfam00729)                                      |
| TC-Tombus-LV-286 | MR233-17D/42383  | 4804 nt | OR843906 | 22.8494 | 794  | orf1; orf2; orf3: RdRp3 (pfam00998, cd23206); orf4-par: CP (pfam00729)                            |
| TC-Tombus-LV-287 | MR233-17E/21850  | 1316 nt | OR843907 | 7.51414 | 74   | orf1-par; orf2-par                                                                                |
| TC-Tombus-LV-288 | MR233-17E/22011  | 1540 nt | OR843908 | 4.32727 | 48   | orf1-par: RdRp3 (pfam00998, cd23206); orf2-par: CP (pfam00729)                                    |
| TC-Tombus-LV-289 | MR233-17E/22302  | 1303 nt | OR843909 | 19.0184 | 182  | orf1-par: RdRp3 (pfam00998, cd23206); orf2-par                                                    |
| TC-Tombus-LV-290 | MR233-17E/22533  | 1881 nt | OR843910 | 6.58745 | 88   | orf1-par: RdRp3 (pfam00998, cd23179); orf2-par                                                    |
| TC-Tombus-LV-291 | MR233-17E/22562  | 1295 nt | OR843911 | 9.04402 | 84   | orf1-par: CP (pfam00729); orf2-par                                                                |
| TC-Tombus-LV-292 | MR233-17E/23274  | 1276 nt | OR843912 | 10.5807 | 98   | orf: RdRp3 (pfam00998, cd23206)                                                                   |
| TC-Tombus-LV-293 | MR233-17E/23559  | 2388 nt | OR843913 | 7.2701  | 126  | orf1-par: RdRp3 (pfam00998, cd23206); orf2: CP (pfam00729)                                        |
| TC-Tombus-LV-294 | MR233-17E/40814  | 2885 nt | OR843914 | 224.069 | 4616 | orf1-par: P33 (pfam08500); orf2: RdRp3 (pfam00998, cd23239); orf3                                 |
| TC-Tombus-LV-295 | MR233-17E/24382  | 2076 nt | OR843915 | 7.35934 | 106  | orf1: RdRp3 (pfam00998, cd23242); orf2-par: CP (pfam00729)                                        |
| TC-Tombus-LV-296 | MR233-17E/24767  | 1237 nt | OR843916 | 5.32579 | 44   | orf1-par; orf2-par: RdRp3 (pfam00998, cd23242)                                                    |
| TC-Tombus-LV-297 | MR233-17E/24947  | 2522 nt | OR843917 | 7.17962 | 128  | orf1-par: RdRp3 (pfam00998, cd23206); orf2: CP (pfam00729)                                        |
| TC-Tombus-LV-298 | MR233-17E/25089  | 1229 nt | OR843918 | 7.72742 | 68   | orf1-par: RdRp3 (pfam00998, cd23242); orf2-par                                                    |
| TC-Tombus-LV-299 | MR233-17E/25566  | 1218 nt | OR843919 | 17.3259 | 152  | orf-par: RdRp3 (pfam00998, cd23179)                                                               |
| TC-Tombus-LV-300 | MR233-17E/26412  | 1199 nt | OR843920 | 6.52794 | 56   | orf1-par; orf2-par: CBPV-RdRp (cd23174)                                                           |
| TC-Tombus-LV-301 | MR233-17E/27668  | 1172 nt | OR843921 | 8.79352 | 72   | orf1-par; orf2-par: RdRp3 (pfam00998, cd23179)                                                    |
| TC-Tombus-LV-302 | MR233-17E/27959  | 1166 nt | OR843922 | 9.49657 | 80   | orf-par: RdRp3 (pfam00998, cd23206)                                                               |
| TC-Tombus-LV-303 | MR233-17E/28208  | 1388 nt | OR843923 | 4.79683 | 48   | orf-par: Peptidase A21 (pfam03566)                                                                |
| TC-Tombus-LV-304 | MR233-17E/28796  | 1149 nt | OR843924 | 5.34813 | 44   | orf-par: RdRp2 (pfam00978, cd23174)                                                               |
| TC-Tombus-LV-305 | MR233-17E/28925  | 1418 nt | OR843925 | 87.3611 | 886  | orf-par: CP (pfam00729); orf2-par                                                                 |
| TC-Tombus-LV-306 | MR233-17E/38212  | 1003 nt | OR843926 | 7.15354 | 50   | orf1-par: RdRp3 (pfam00998, cd23236); orf2-par                                                    |
| TC-Tombus-LV-307 | MR233-17E/29286  | 1139 nt | OR843927 | 4.81036 | 42   | orf-par: CP (pfam00729)                                                                           |
| TC-Tombus-LV-308 | MR233-17E/29532  | 1134 nt | OR843928 | 10.813  | 90   | suppression of UAG and UAA codons; orf1-par: RdRp3 (pfam00998, cd23242); orf2-par: CP (pfam00729) |

|                  |                 |         |          |         |      |                                                                  |
|------------------|-----------------|---------|----------|---------|------|------------------------------------------------------------------|
| TC-Tombus-LV-309 | MR233-17E/29541 | 1134 nt | OR843929 | 9.78836 | 78   | orf-par: RdRp3 (pfam00998, cd23238)                              |
| TC-Tombus-LV-310 | MR233-17E/29961 | 1126 nt | OR843930 | 14.4112 | 118  | orf1-par: CP (pfam00729); orf2: P22 (pfam03558)                  |
| TC-Tombus-LV-311 | MR233-17E/30235 | 1122 nt | OR843931 | 4.24866 | 34   | orf1-par: RdRp3 (pfam00998, cd23179); orf2-par                   |
| TC-Tombus-LV-312 | MR233-17E/30348 | 1447 nt | OR843932 | 52.9489 | 542  | orf1; orf2-par: RdRp3 (pfam00998, cd23241)                       |
| TC-Tombus-LV-313 | MR233-17E/30558 | 1116 nt | OR843933 | 6.43548 | 52   | orf1-par: RdRp3 (pfam00998, cd23239); orf2-par: CP (pfam00729)   |
| TC-Tombus-LV-314 | MR233-17E/30956 | 1109 nt | OR843934 | 5.74031 | 46   | orf1-par; orf2-par: RdRp3 (pfam00998, cd23240)                   |
| TC-Tombus-LV-315 | MR233-17E/31886 | 2840 nt | OR843935 | 71.218  | 1444 | orf1-par; orf2: RdRp3 (pfam00998, cd23240); orf3: CP (pfam00729) |
| TC-Tombus-LV-316 | MR233-17E/32931 | 1167 nt | OR843936 | 78.3779 | 660  | orf: P33 (pfam08500)                                             |
| TC-Tombus-LV-317 | MR233-17E/33228 | 1072 nt | OR843937 | 6.50933 | 52   | orf-par: RdRp3 (pfam00998, cd23242)                              |
| TC-Tombus-LV-318 | MR233-17E/33268 | 1071 nt | OR843938 | 8.23623 | 62   | orf-par: RdRp3 (pfam00998, cd01699)                              |
| TC-Tombus-LV-319 | MR233-17E/33346 | 1480 nt | OR843939 | 7.38188 | 74   | orf1-par: RdRp3 (pfam00998, cd23237); orf2-par: CP (pfam00729)   |
| TC-Tombus-LV-320 | MR233-17E/33411 | 1069 nt | OR843940 | 9.30964 | 68   | orf-par: CP (pfam00729)                                          |
| TC-Tombus-LV-321 | MR233-17E/33419 | 1676 nt | OR843941 | 7.06416 | 84   | orf1-par; orf2-par: RdRp3 (pfam00998, cd23206)                   |
| TC-Tombus-LV-322 | MR233-17E/34098 | 1059 nt | OR843942 | 3.60057 | 26   | orf-par: RdRp3 (pfam00998, cd23206)                              |
| TC-Tombus-LV-323 | MR233-17E/34177 | 1057 nt | OR843943 | 19.35   | 144  | orf1-par; orf2-par: RdRp3 (pfam00998, cd23234)                   |
| TC-Tombus-LV-324 | MR233-17E/34903 | 1047 nt | OR843944 | 6.0936  | 46   | orf-par: RdRp3 (pfam00998, cd23179)                              |
| TC-Tombus-LV-325 | MR233-17E/35444 | 1039 nt | OR843945 | 13.0308 | 100  | orf-par: RdRp3 (pfam00998, cd23234)                              |
| TC-Tombus-LV-326 | MR233-17/35596  | 1136 nt | OR843946 | 9.41109 | 74   | orf-par: RdRp3 (pfam00998, cd23206)                              |
| TC-Tombus-LV-327 | MR233-17E/35728 | 1035 nt | OR843947 | 11.4725 | 86   | orf-par: RdRp3 (pfam00998, cd23241)                              |

|              |                                                   |                  |         |          |         |        |                                                                                                                                   |
|--------------|---------------------------------------------------|------------------|---------|----------|---------|--------|-----------------------------------------------------------------------------------------------------------------------------------|
|              | TC-Tombus-LV-328                                  | MR233-17E/36503  | 1025 nt | OR843948 | 11.3688 | 84     | orf1-par: P33 (pfam08500); orf2-par: RdRp (cd23236)                                                                               |
|              | TC-Tombus-LV-329                                  | MR233-17/37009   | 2471 nt | OR843949 | 102.212 | 1794   | orf1: RdRp3 (pfam00998, cd23242); orf2: CP (pfam00729)                                                                            |
|              | TC-Tombus-LV-330                                  | MR233-17E/37080  | 1018 nt | OR843950 | 3.2554  | 24     | orf-par: CP (pfam00729)                                                                                                           |
|              | TC-Tombus-LV-331                                  | MR233-17E/37903  | 1007 nt | OR843951 | 10.2006 | 72     | orf1-par; orf2-par: RdRp3 (pfam00998, cd23241)                                                                                    |
|              | TC-Tombus-LV-332                                  | MR233-17E/557    | 8184 nt | OR843952 | 40.357  | 2352   | orf1; orf2; orf3: CBPV-RdRp (cd23174)                                                                                             |
|              | TC-Tombus-LV-333                                  | MR233-17E/488    | 8546 nt | OR843953 | 14.6201 | 886    | orf1; orf2; orf3: RdRp (cd01699)                                                                                                  |
|              | TC-Tombus-LV-334                                  | MR233-17E/48080  | 1049 nt | OR843954 | 9.82936 | 74     | orf-par: CP (pfam00729)                                                                                                           |
|              | TC-Tombus-LV-335                                  | MR233-17D/127838 | 1301 nt | OR843955 | 6.38432 | 58     | orf-par: PepA21 (pfam03566)                                                                                                       |
| Virgaviridae | Havel cucumber green mottle mosaic virus 1        | MR644-18D/6593   | 6487 nt | OR843956 | 196.244 | 9120   | orf1-2: VMethylTr (pfam01660), Helicase 1 (pfam01443), RdRp2 (pfam00978, cd23251); orf3: MP (pfam01107); orf4: CP (pfam00721)     |
|              | Havel cucumber green mottle mosaic virus 2        | MR644-18D/7065   | 4814 nt | OR843957 | 62.9887 | 2242   | orf1-2-par: Helicase 1 (pfam01443), RdRp2 (pfam00978, cd23251), orf3: MP (pfam01107), orf4: CP (pfam00721)                        |
|              | Havel cucumber green mottle mosaic virus 3        | MR644-18E/367    | 6394 nt | OR843958 | 74.2477 | 3404   | orf1-2: VMethylTr (pfam01660), Helicase 1 (pfam01443), RdRp2 (pfam00978, cd23251); orf3: MP (pfam01107); orf4: CP (pfam00721)     |
|              | Havel pepper mild mottle virus 1                  | MR644-18E/141    | 5723 nt | OR843959 | 67.7239 | 2794   | orf1-2: VMethylTr (pfam01660), Helicase 1 (pfam01443), RdRp2 (pfam00978, cd01699); orf3: MP (pfam0110)                            |
|              | Havel pepper mild mottle virus 2                  | MR644-18D/4643   | 3101 nt | OR843960 | 21.2828 | 466    | orf1-2-par: Helicase 1 (pfam01443), RdRp2 (pfam00978, cd23251), orf3-par: MP (pfam01107)                                          |
|              | Havel pepper mild mottle virus 3                  | MR644-18D/5625   | 1853 nt | OR843961 | 26.3357 | 356    | orf1-2-par: Helicase 1 (pfam01443), RdRp2 (pfam00978, cd23251)                                                                    |
|              | Havel tobacco mild green mosaic virus             | MR644-18/1455    | 2389 nt | OR843962 | 7.65365 | 144    | orf1-2-par: Helicase 1 (pfam01443), RdRp2 (pfam00978, cd23251)                                                                    |
|              | Havel tobacco mosaic virus 1                      | MR644-18E/1480   | 1954 nt | OR843963 | 11.1351 | 158    | orf1-par: Helicase 1 (pfam01443)                                                                                                  |
|              | Havel tobacco mosaic virus 2                      | MR644-18E/3430   | 2586 nt | OR843964 | 11.5557 | 216    | orf1-2-par: Helicase 1 (pfam01443), RdRp2 (pfam00978, cd23252); orf3-par: MP (pfam01107)                                          |
|              | Havel tobacco mosaic virus 3                      | MR644-18/10659   | 1083 nt | OR843965 | 14.8098 | 114    | orf2-par: RdRp2 (pfam00978, cd23252); orf3-par: MP (pfam01107)                                                                    |
|              | Havel turnip vein-clearing virus 1                | MR644-18E/2831   | 1332 nt | OR843966 | 6.81907 | 66     | orf3-par: MP (pfam01107); orf4: CP (pfam00721)                                                                                    |
|              | Havel turnip vein-clearing virus 2                | MR644-18D/30380  | 998 nt  | OR843967 | 5.56112 | 44     | orf1-par: VMethylTr (pfam01660)                                                                                                   |
|              | Teltow Canal African eggplant-associated virus    | MR233-17E/1297   | 5557 nt | OR843968 | 28.837  | 1644   | orf1-2-par: VMethylTr (pfam01660), Helicase 1 (pfam01443), RdRp2 (pfam00978, cd23251); orf3: MP (pfam01107); orf4: CP (pfam00721) |
|              | Teltow Canal chili pepper mild mottle virus       | MR233-17E/976    | 6303 nt | OR843969 | 36.5905 | 570194 | orf1-2: VMethylTr (pfam01660), Helicase 1 (pfam01443), RdRp2 (pfam00978, cd23251); orf3: MP (pfam01107); orf4: CP (pfam00721)     |
|              | Teltow Canal cucumber green mottle mosaic virus 1 | MR233-17E/3327   | 6478 nt | OR843970 | 12382.4 | 420216 | orf1-2: VMethylTr (pfam01660), Helicase 1 (pfam01443), RdRp2 (pfam00978, cd23251); orf3: MP (pfam01107); orf4: CP (pfam00721)     |
|              | Teltow Canal cucumber green mottle mosaic virus 2 | MR233-17E/1485   | 6465 nt | OR843971 | 9145.23 | 58     | orf1-2: VMethylTr (pfam01660), Helicase 1 (pfam01443), RdRp2 (pfam00978, cd23251); orf3: MP (pfam01107); orf4: CP (pfam00721)     |
|              | Teltow Canal Odontoglossum ringspot virus         | MR233-17E/19797  | 1381 nt | OR843972 | 5.95655 | 13782  | orf2-par: RdRp2 (pfam00978, cd23252)                                                                                              |
|              | Teltow Canal paprika mild mottle virus            | MR233-17E/920    | 6506 nt | OR843973 | 296.356 | 240544 | orf1-2: VMethylTr (pfam01660), Helicase 1 (pfam01443), RdRp2 (pfam00978, cd23251); orf3: MP (pfam01107); orf4: CP (pfam00721)     |
|              | Teltow Canal pepper mild mottle virus             | MR233-17E/1050   | 6342 nt | OR843974 | 5325.65 | 456    | orf1-2: VMethylTr (pfam01660), Helicase 1 (pfam01443), RdRp2 (pfam00978, cd23251); orf3: MP (pfam01107); orf4: CP (pfam00721)     |
|              | Teltow Canal Rehmannia mosaic virus 1             | MR233-17E/21037  | 1339 nt | OR843975 | 47.2651 | 534    | orf1-par: Helicase 1 (pfam01443)                                                                                                  |
|              | Teltow Canal Rehmannia mosaic virus 2             | MR233-17E/29780  | 1129 nt | OR843976 | 63.6492 | 430    | orf3: MP (pfam01107); orf4-par: CP (pfam00721)                                                                                    |
|              | Teltow Canal ribgrass mosaic virus 1              | MR233-17E/20436  | 1359 nt | OR843977 | 43.8102 | 420    | orf1-par: VMethylTr (pfam01660)                                                                                                   |
|              | Teltow Canal ribgrass mosaic virus 2              | MR233-17E/17110  | 1486 nt | OR843978 | 39.0834 | 816    | orf1-par: Helicase 1 (pfam01443)                                                                                                  |
|              | Teltow Canal ribgrass mosaic virus 3              | MR233-17E/21771  | 1975 nt | OR843979 | 57.679  | 21140  | orf1-2-par: Helicase 1 (pfam01443), RdRp2 (pfam00978, cd23251)                                                                    |
|              | Teltow Canal tobacco mild green mosaic virus      | MR233-17E/963    | 6332 nt | OR843980 | 468.094 | 860    | orf1-2: VMethylTr (pfam01660), Helicase 1 (pfam01443), RdRp2 (pfam00978, cd23251); orf3: MP (pfam01107); orf4: CP (pfam00721)     |
|              | Teltow Canal tobacco mosaic virus 1               | MR233-17E/27744  | 2229 nt | OR843981 | 53.5451 | 8498   | orf1: VMethylTr (pfam01660), Helicase 1 (pfam01443)                                                                               |
|              | Teltow Canal tobacco mosaic virus 2               | MR233-17E/14113  | 3662 nt | OR843982 | 322.641 | 10202  | orf1-2-par: VMethylTr (pfam01660), Helicase 1 (pfam01443), RdRp2 (pfam00978, cd23251)                                             |
|              | Teltow Canal tomato brown rugose fruit virus      | MR233-17E/2703   | 6364 nt | OR843983 | 223.728 | 36340  | orf1-2: VMethylTr (pfam01660), Helicase 1 (pfam01443), RdRp2 (pfam00978, cd23251); orf3: MP (pfam01107); orf4: CP (pfam00721)     |
|              | Teltow Canal tomato mosaic virus                  | MR233-17E/2015   | 6337 nt | OR843984 | 803.157 | 800    | orf1-2: VMethylTr (pfam01660), Helicase 1 (pfam01443), RdRp2 (pfam00978, cd23251); orf3: MP (pfam01107); orf4: CP (pfam00721)     |
|              | Teltow Canal tomato mottle mosaic virus           | MR233-17E/2807   | 5250 nt | OR843985 | 21.1244 | 1158   | orf1-2-par: VMethylTr (pfam01660), Helicase 1 (pfam01443), RdRp2 (pfam00978, cd23251); orf3: MP (pfam01107); orf4: CP (pfam00721) |
|              | Teltow Canal turnip vein-clearing virus 1         | MR233-17E/23953  | 3120 nt | OR843986 | 142.97  | 3186   | orf1-2-par: Helicase 1 (pfam01443), RdRp2 (pfam00978, cd23251)                                                                    |
|              | Teltow Canal turnip vein-clearing virus 2         | MR233-17E/25949  | 1209 nt | OR843987 | 64.1572 | 556    | orf2-par: RdRp2 (pfam00978, cd23251)                                                                                              |
|              | Teltow Canal turnip vein-clearing virus 3         | MR233-17E/37541  | 1011 nt | OR843988 | 54.9862 | 402    | orf1-par: VMethylTr (pfam01660)                                                                                                   |
